# Supplementary material for: Lewis acid-catalyzed (3 + 2) annulation of bicyclobutanes with ynamides: access to 2-amino-bicyclo[2.1.1]hexenes
Source: Royal Society of Chemistry journal article supplement (doi:10.1039/d4sc03893b), 2024-01-01

# Lewis acid-catalyzed (3+2) annulation of bicyclobutanes with ynamides: Access to 2-amino bicyclo[2.1.1]hexenes

Deeptanu Sarkar, Shiksha Deswal, Rohan Chandra Das and Akkattu T. Biju\*

*Department of Organic Chemistry, Indian Institute of Science, Bangalore-560012, India*

Email: [atbiju@iisc.ac.in](mailto:atbiju@iisc.ac.in)

## Supporting Information

|                                                                                                    |     |
|----------------------------------------------------------------------------------------------------|-----|
| 1. General Information                                                                             | S02 |
| 2. General Procedure for the Optimization of the Reaction Conditions                               | S03 |
| 3. General Procedure for the Lewis Acid-Catalyzed (3+2) Annulation of Bicyclobutanes with Ynamides | S04 |
| 4. Mechanistic Studies                                                                             | S05 |
| 5. X-ray Data of <b>3a</b>                                                                         | S07 |
| 6. Synthesis and Characterization of Substituted 2-Amino Bicyclo[2.1.1]hexene Derivatives          | S09 |
| 7. Product Functionalization                                                                       | S31 |
| 8. <sup>1</sup> H and <sup>13</sup> C NMR Spectra of 2-Amino Bicyclo[2.1.1]hexenes                 | S34 |

## 1. General Information

Unless otherwise specified, all reactions were carried out under an atmosphere of argon in oven-dried reaction vessels with Teflon screw caps. 30 °C corresponds to the room temperature (rt) of the lab when the experiments were carried out. CH<sub>2</sub>Cl<sub>2</sub> was freshly purified by distillation over CaH<sub>2</sub> under argon atmosphere. All BCBs were prepared following the reported literature procedures.<sup>1</sup> All ynamides and their derivatives were prepared following the literature procedure.<sup>2</sup>

Analytical thin layer chromatography was performed on TLC Silica gel 60 F<sub>254</sub>. All the isolated new compounds were confirmed to be a single spot on TLC. Visualization was accomplished with short wave UV light or KMnO<sub>4</sub> staining solutions followed by heating. Column chromatography was performed on silica gel (230-400 mesh) by standard techniques eluting with Pet. Ether-EtOAc solvent system.

All compounds were fully characterized. <sup>1</sup>H and <sup>13</sup>C NMR spectra were recorded on Bruker Ultrashield spectrometer in CDCl<sub>3</sub> as solvent. Chemical shifts (δ) are given in ppm. The residual solvent signals were used as references and the chemical shifts converted to the TMS scale (CDCl<sub>3</sub>: δ<sub>H</sub> = 7.26 ppm, δ<sub>C</sub> = 77.16 ppm). Infrared (FT-IR) spectra were recorded on a Bruker Alfa FT-IR, ν-max in cm<sup>-1</sup>. HRMS (ESI) data were recorded on a Waters Xevo G2-XS Q-TOF instrument.

---

<sup>1</sup> R. Guo, Y. Chang, L. Herter, C. Salome, S. E. Braley, T. C. Fessard and M. K. Brown, *J. Am. Chem. Soc.*, 2022, **144**, 7988.

<sup>2</sup> (a) K. Murakami, J. Imoto, H. Matsubara, S. Yoshida, H. Yorimitsu and K. Oshima, *Chem. Eur. J.*, 2013, **19**, 5625. (b) M. Chen, N. Sun, H. Chen and Y. Liu, *Chem. Commun.*, 2016, **52**, 6324.

## 2. General Procedure for the Optimization of the Reaction Conditions

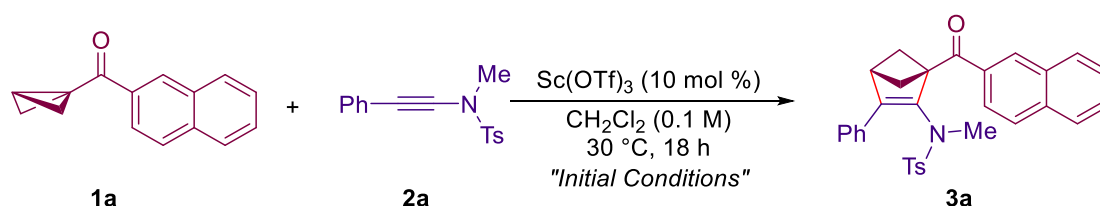

To an oven-dried Schlenk tube equipped with a magnetic stir bar was added bicyclo[1.1.0]butan-1-yl(naphthalen-2-yl)methanone **1a** (21 mg, 0.1 mmol) and CH<sub>2</sub>Cl<sub>2</sub> (1.0 ml) under argon atmosphere. To this mixture, Sc(OTf)<sub>3</sub> (5 mg, 0.01 mmol) was added and then *N*,4-dimethyl-*N*-(phenylethynyl)benzenesulfonamide **2a** (57 mg, 0.2 mmol) was added and kept for stirring at 30 °C for 18 h under argon atmosphere. After the reaction completion (monitored by TLC), solvent was evaporated, and the crude mixture was passed through a pad of silica gel and eluted with EtOAc (3x10 mL). The reaction mixture was concentrated under reduced pressure and then the yield of **3a** was determined by the <sup>1</sup>H NMR analysis of the crude reaction mixture using 1,3,5-trimethoxybenzene as the internal standard.

**Table S1.** Optimization Studies

| entry           | variation of the initial conditions <sup>a</sup>                                        | yield of <b>3a</b> (%) <sup>b</sup> |
|-----------------|-----------------------------------------------------------------------------------------|-------------------------------------|
| 1               | None ( <b>2a</b> added at the end)                                                      | 62 (61)                             |
| 2               | Yb(OTf) <sub>3</sub> instead of Sc(OTf) <sub>3</sub>                                    | 50                                  |
| 3               | Bi(OTf) <sub>3</sub> instead of Sc(OTf) <sub>3</sub>                                    | 20                                  |
| 4               | TMS-OTf instead of Sc(OTf) <sub>3</sub>                                                 | 51                                  |
| 5               | Eu(OTf) <sub>3</sub> instead of Sc(OTf) <sub>3</sub>                                    | 38                                  |
| 6               | AlCl <sub>3</sub> instead of Sc(OTf) <sub>3</sub>                                       | 23                                  |
| 7               | CHCl <sub>3</sub> instead of CH <sub>2</sub> Cl <sub>2</sub>                            | 60                                  |
| 8               | Toluene instead of CH <sub>2</sub> Cl <sub>2</sub>                                      | 53                                  |
| 9               | MeCN instead of CH <sub>2</sub> Cl <sub>2</sub>                                         | 50                                  |
| 10              | DCE instead of CH <sub>2</sub> Cl <sub>2</sub>                                          | 43                                  |
| 11              | With 4 Å MS as the additive                                                             | 56                                  |
| 12              | 50 °C instead of 30 °C                                                                  | 63                                  |
| 13              | 20 °C instead of 30 °C                                                                  | 51                                  |
| 14              | 12 h instead of 18 h                                                                    | 52                                  |
| 15              | 24 h instead of 18 h                                                                    | 61                                  |
| 16              | 2.0 equiv of <b>1a</b> and 1.0 of equiv <b>2a</b>                                       | 54                                  |
| 17              | 0.05 M CH <sub>2</sub> Cl <sub>2</sub> instead of 0.1 M CH <sub>2</sub> Cl <sub>2</sub> | 49                                  |
| 18              | 5 mol % Sc(OTf) <sub>3</sub> instead of 10 mol %                                        | 59                                  |
| 19              | 15 mol % Sc(OTf) <sub>3</sub> instead of 10 mol %                                       | 62                                  |
| 20 <sup>c</sup> | Sc(OTf) <sub>3</sub> added at the end                                                   | 65 (65)                             |
| 21              | reaction in the absence of Sc(OTf) <sub>3</sub>                                         | <5                                  |

<sup>a</sup> Initial conditions: **1a** (0.1 mmol), **2a** (2.0 equiv), Sc(OTf)<sub>3</sub> (10 mol %), CH<sub>2</sub>Cl<sub>2</sub> (0.1 M), 30 °C, 18 h.

<sup>b</sup> The <sup>1</sup>H NMR yield of the crude products determined with the aid of 1,3,5-trimethoxybenzene as an internal standard. <sup>c</sup> Sc(OTf)<sub>3</sub> was added at the last.

### 3. General Procedure for the Lewis Acid-Catalyzed (3+2) Annulation of Bicyclobutanes with Ynamides

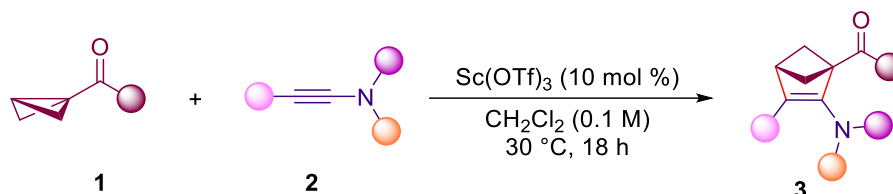

To an oven-dried Schlenk tube equipped with a magnetic stir bar was added BCBs **1** (0.2 mmol) and CH<sub>2</sub>Cl<sub>2</sub> (2.0 ml) under argon atmosphere. To this mixture, the ynamide derivatives **2** (0.4 mmol) was added, then Sc(OTf)<sub>3</sub> (0.02 mmol) was added to it and kept for stirring at 30 °C for 18 h under argon atmosphere. After the reaction completion (monitored by TLC), solvent was evaporated, and the crude residue was pre-adsorbed on silica and purified by column chromatography (Pet. Ether-EtOAc as the eluent) to afford **3** in good to excellent yields.

#### Procedure for the 2.0 mmol Scale Reaction for the synthesis of **3a**

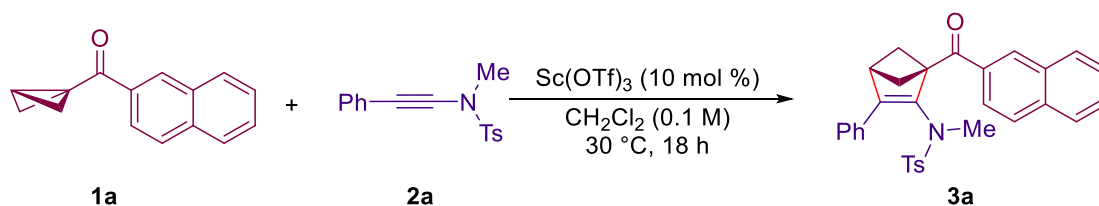

To an oven-dried Schlenk tube equipped with a magnetic stir bar was added bicyclo[1.1.0]butan-1-yl(naphthalen-2-yl)methanone **1a** (416 mg, 2.0 mmol) and CH<sub>2</sub>Cl<sub>2</sub> (20 ml) under argon atmosphere. To this mixture, *N*,4-dimethyl-*N*-(phenylethynyl)benzene sulfonamide **2a** (1141 mg, 4.0 mmol) was added, then Sc(OTf)<sub>3</sub> (98 mg, 0.2 mmol) was added to it and kept for stirring at 30 °C for 18 h under argon atmosphere. After the reaction completion (monitored by TLC), solvent was evaporated, and the crude residue was pre-adsorbed on silica and purified by column chromatography (Pet. Ether-EtOAc as the eluent) to afford **3a** as a white solid (592 mg, 60% yield).

#### Unsuccessful substrates in this (3+2) annulation

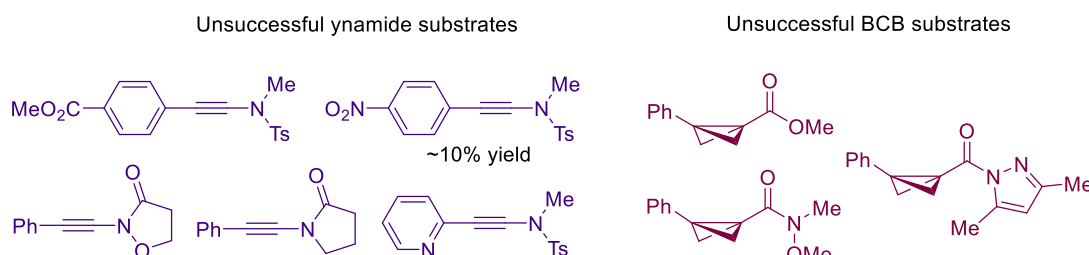



## 4. Mechanistic Studies

### 1. Competition experiment between BCB and donor-acceptor cyclopropane:

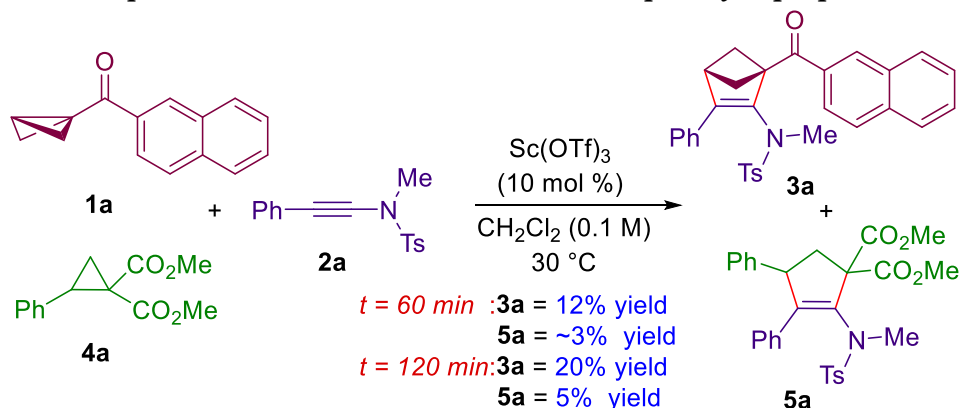

To an oven-dried Schlenk tube equipped with a magnetic stir bar was added bicyclo[1.1.0]butan-1-yl(naphthalen-2-yl)methanone **1a** (10.4 mg, 0.05 mmol) and CH<sub>2</sub>Cl<sub>2</sub> (1.0 ml) under argon atmosphere. To this mixture, dimethyl 2-phenylcyclopropane-1,1-dicarboxylate **4a** (11.7 mg, 0.05 mmol), *N*,4-dimethyl-*N*-(phenylethynyl)benzenesulfonamide **2a** (57.1 mg, 0.2 mmol) was added, then Sc(OTf)<sub>3</sub> (5 mg, 0.01 mmol) was added to it and purged with argon gas. The reaction mixture is then kept for stirring at 30 °C for different time intervals (see table below). The reaction mixture is diluted with CH<sub>2</sub>Cl<sub>2</sub> (2.0 mL) and filtered through a short pad of silica gel and eluted with ethyl acetate (10 mL). The solvent was then evaporated, and the crude product was analyzed using <sup>1</sup>H NMR spectroscopy using 1,3,5-trimethoxybenzene (16.8 mg, 0.1 mmol) as the internal standard.

| entry | time (min) | yield of <b>3a</b> (%) | yield of <b>5a</b> (%) |
|-------|------------|------------------------|------------------------|
| 1     | 60         | 12                     | ~3                     |
| 2     | 120        | 20                     | 5                      |

### <sup>1</sup>H NMR of **3a**:

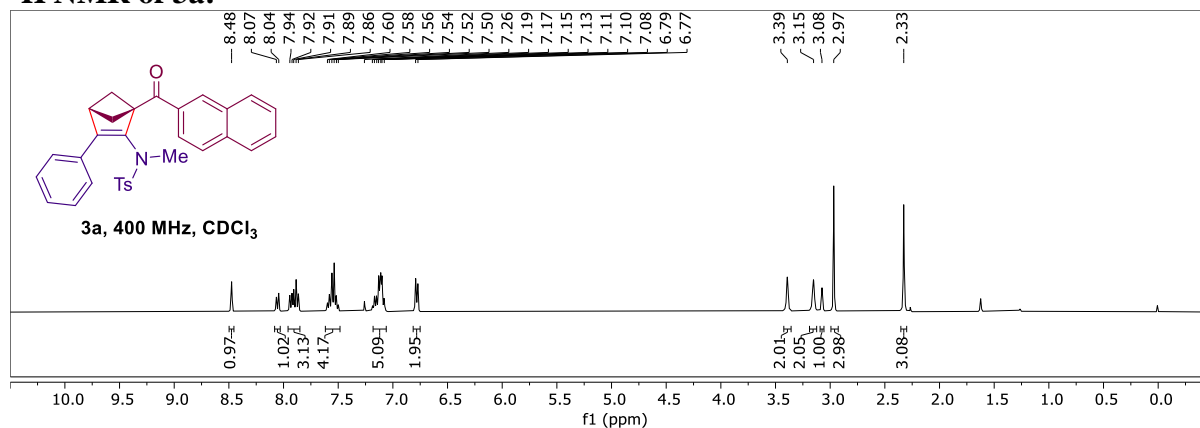

### $^1\text{H}$ NMR of **5a**:

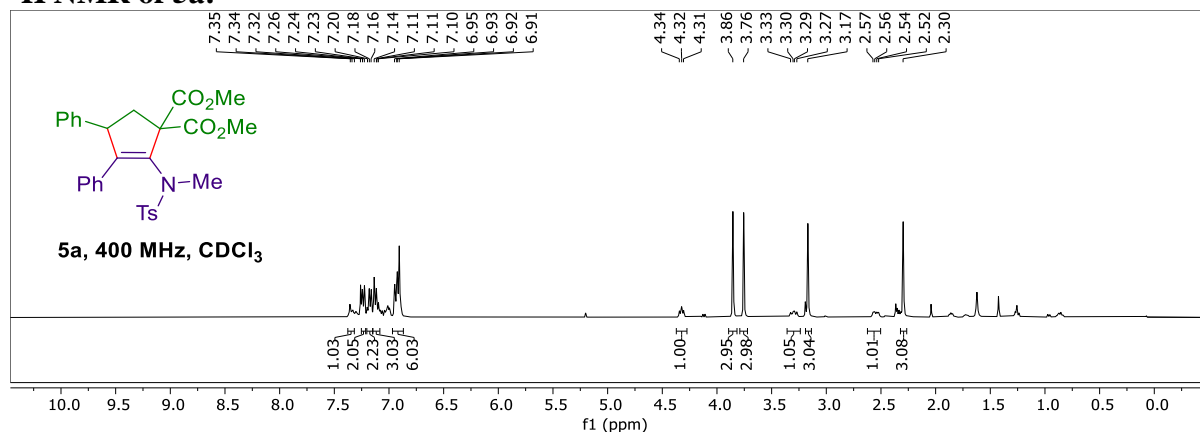

### $^1\text{H}$ NMR of the crude reaction mixture after 60 min ( $\text{CDCl}_3$ ):

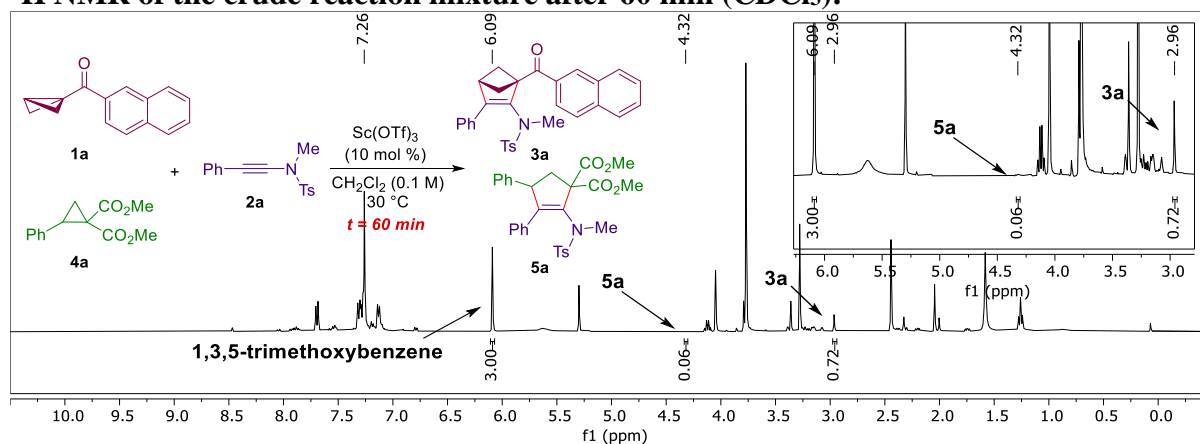

### $^1\text{H}$ NMR of the crude reaction mixture after 120 min ( $\text{CDCl}_3$ ):

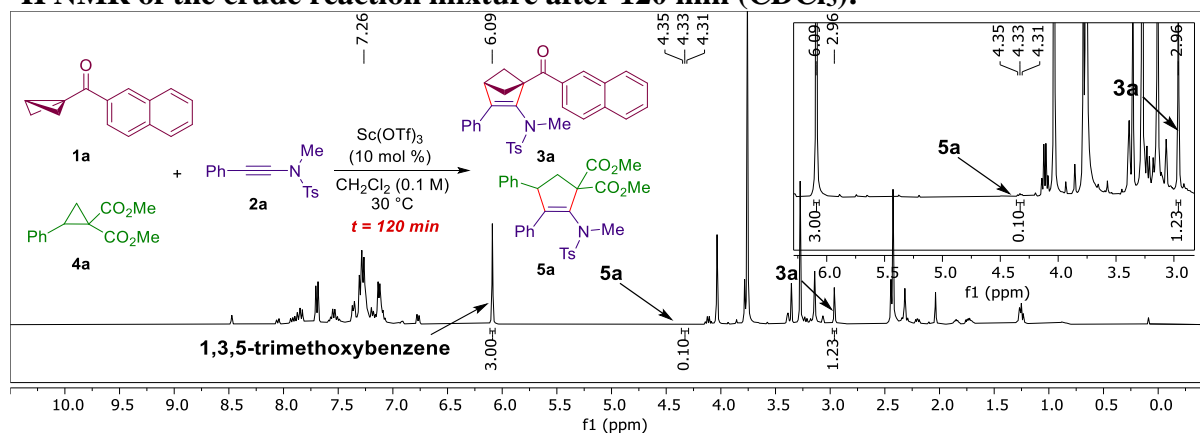

## 2. Attempt to intercept the enolate intermediate:

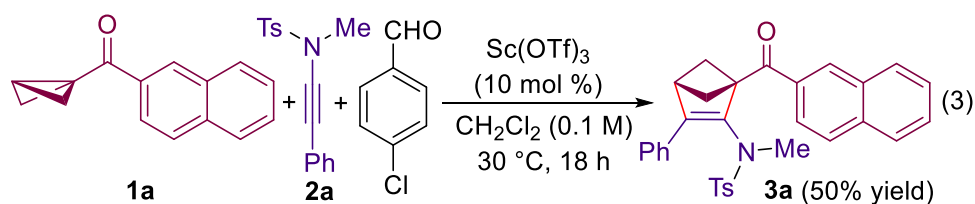

To an oven-dried Schlenk tube equipped with a magnetic stir bar was added bicyclo[1.1.0]butan-1-yl(naphthalen-2-yl)methanone **1a** (21 mg, 0.1 mmol) and  $\text{CH}_2\text{Cl}_2$  (1.0 ml) under argon atmosphere. To this mixture, 4-chlorobenzaldehyde **4a** (14 mg, 0.1 mmol),

*N*,4-dimethyl-*N*-(phenylethynyl)benzenesulfonamide **2a** (57 mg, 0.2 mmol) was added, then Sc(OTf)<sub>3</sub> (5 mg, 0.01 mmol) was added to it and purged with argon gas. The reaction mixture is then kept for stirring at 30 °C for different time intervals (see table below). The reaction mixture is diluted with CH<sub>2</sub>Cl<sub>2</sub> (2.0 mL) and filtered through a short pad of silica gel and eluted with ethyl acetate (10 mL). The solvent was then evaporated, and the crude product was analyzed using <sup>1</sup>H NMR spectroscopy using 1,3,5-trimethoxybenzene (16.8 mg, 0.1 mmol) as the internal standard.

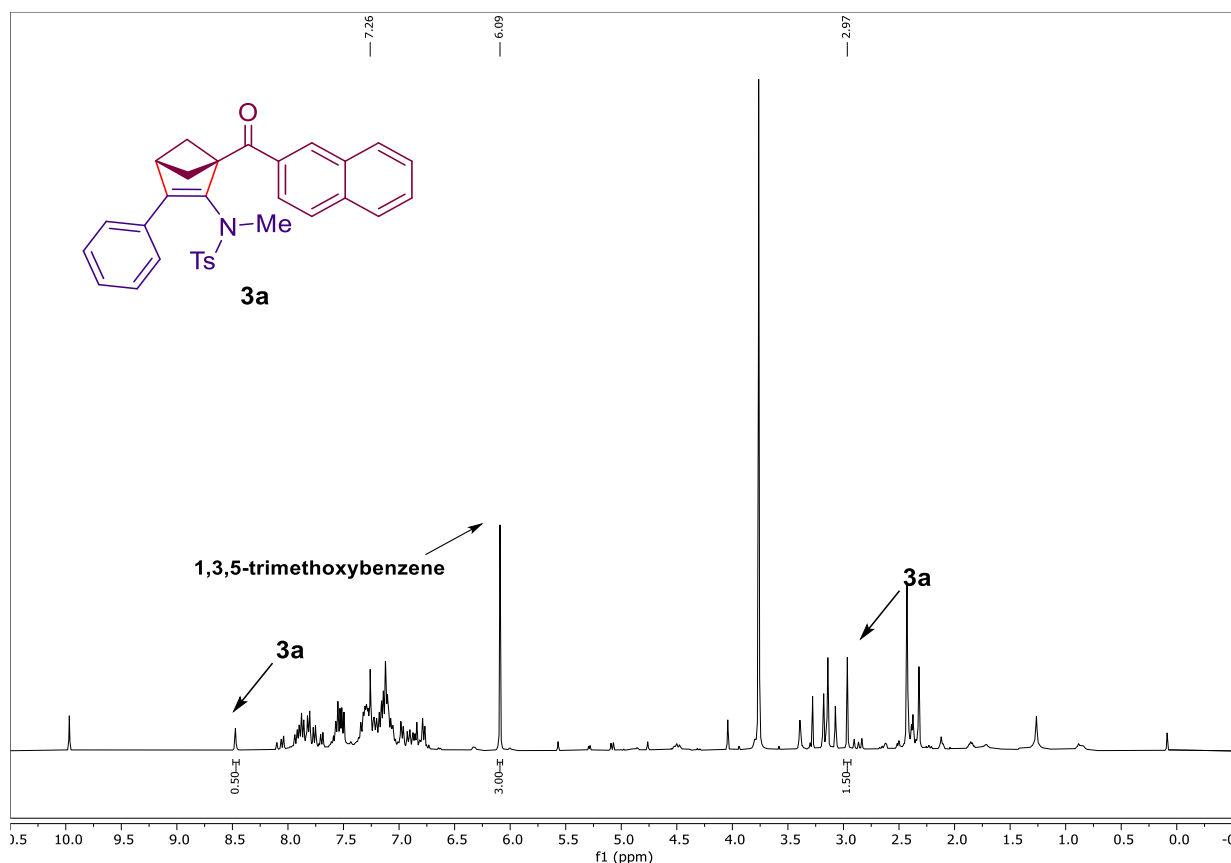

## 5. X-ray Data of **3a**

Single crystal of **3a** (recrystallized from CHCl<sub>3</sub>/*n*-hexane at 25 °C) was mounted and the diffraction data was collected at 120 K on a Bruker APEX-II CCD diffractometer using SMART/SAINT software. Intensity data were collected using MoK $\alpha$  radiation ( $\lambda=0.71073$  Å). The single crystal was affixed to a Hampton Research cryoloop using Paratone-N oil. Data collection and reduction was performed using Bruker APEX2 and Bruker SAINT, respectively. The structure was solved by direct methods using the SHELX-97 and refined by full-matrix leastsquares on F<sub>2</sub>. Empirical absorption corrections were applied with SADABS. All Nonhydrogen atoms were refined anisotropically and hydrogen atoms were included in

geometric positions. Structure was drawn using Olex-2 and Mercury-3. CCDC 2358094 (**3a**) contains the supplementary crystallographic data for this paper. This data can be obtained free of charge from the Data Centre via [www.ccdc.cam.ac.uk/data\\_request/cif](http://www.ccdc.cam.ac.uk/data_request/cif). The crystallographic refinement parameters are given below:

|                                   |                                                                                     |
|-----------------------------------|-------------------------------------------------------------------------------------|
| Compound                          | <b>3a</b>                                                                           |
| Empirical formula                 | C <sub>31</sub> H <sub>27</sub> NO <sub>3</sub> S                                   |
| Formula weight                    | 493.59                                                                              |
| Temperature                       | 120(2) K                                                                            |
| Wavelength                        | 0.71073 Å                                                                           |
| Crystal system                    | Monocyclic                                                                          |
| Space group                       | P2 <sub>1</sub> /c                                                                  |
| Unit cell dimensions              | a = 6.8078(18) Å, b = 31.102(8) Å, c = 12.122(3) Å, α = 90°, β = 99.747(8), γ = 90° |
| Volume                            | 2529.7(11) Å <sup>3</sup>                                                           |
| Z                                 | 4                                                                                   |
| Density (calculated)              | 1.296 g/cm <sup>3</sup>                                                             |
| Absorption coefficient            | 0.162 mm <sup>-1</sup>                                                              |
| F(000)                            | 1040                                                                                |
| Theta range for data collection   | 2.620 to 31.542°                                                                    |
| Index ranges                      | -9 ≤ h ≤ 10, -45 ≤ k ≤ 45, -17 ≤ l ≤ 17                                             |
| Reflections collected             | 94382                                                                               |
| Independent reflections           | 8403 [R <sub>int</sub> = 0.0445, R <sub>sigma</sub> = 0.0206]                       |
| Data / restraints / parameters    | 8403/0/327                                                                          |
| Goodness-of-fit on F <sup>2</sup> | 1.097                                                                               |
| Final R indices [I > 2σ(I)]       | R <sub>I</sub> = 0.0427, wR <sub>2</sub> = 0.1056                                   |
| R indices (all data)              | R <sub>I</sub> = 0.0475, wR <sub>2</sub> = 0.1083                                   |

**Table S2** Crystal Data and structure refinement for **3a**

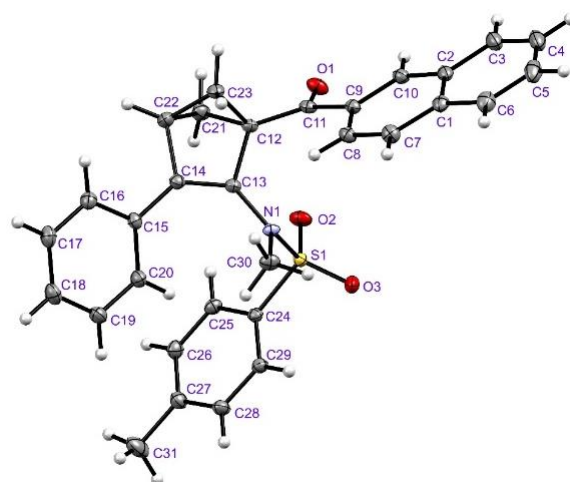

**Figure S1.** Crystal Structure of **3a**

## 6. Synthesis and Characterization of Substituted 2-Amino Bicyclo[2.1.1]hexene Derivatives

### *N*-(1-(2-Naphthoyl)-3-phenylbicyclo[2.1.1]hex-2-en-2-yl)-*N*,4-dimethylbenzenesulfonamide (**3a**)

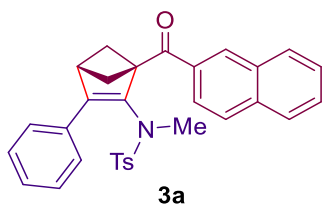

Following the general procedure, treatment of bicyclo[1.1.0]butan-1-yl(naphthalen-2-yl)methanone **1a** (42 mg, 0.2 mmol) and *N*,4-dimethyl-*N*-(phenylethynyl)benzenesulfonamide **2a** (114 mg, 0.4 mmol) with Sc(OTf)<sub>3</sub> (10 mg, 0.02 mmol) in CH<sub>2</sub>Cl<sub>2</sub> (2.0 mL) at 30 °C for 18 h followed by column chromatography (Pet. ether/EtOAc = 90/10) of the crude reaction mixture using silica gel afforded *N*-(1-(2-naphthoyl)-3-phenylbicyclo[2.1.1]hex-2-en-2-yl)-*N*,4-dimethylbenzenesulfonamide **3a** as white solid (64 g, 65% yield).

*R<sub>f</sub>* (Pet. ether/EtOAc = 90/10): 0.23; <sup>1</sup>H NMR (400 MHz, CDCl<sub>3</sub>) δ 8.48 (s, 1H), 8.05 (d, *J* = 8.7 Hz, 1H), 7.94 – 7.86 (m, 3H), 7.60 – 7.50 (m, 4H), 7.19 – 7.08 (m, 5H), 6.78 (d, *J* = 8.5 Hz, 2H), 3.39 (s, 2H), 3.15 (s, 2H), 3.08 (s, 1H), 2.97 (s, 3H), 2.33 (s, 3H). <sup>13</sup>C NMR (100 MHz, CDCl<sub>3</sub>) δ 197.9, 148.1, 147.4, 143.7, 135.6, 135.5, 134.5, 133.1, 132.5, 131.3, 129.7, 128.3, 128.1, 127.9, 127.8, 127.5, 126.6, 126.5, 125.2, 65.8, 41.0, 37.9, 21.5 (2 signals in the aromatic region and 2 signals in the aliphatic region are overlapping). HRMS (ESI) *m/z*: [M+Na]<sup>+</sup> calcd for C<sub>31</sub>H<sub>27</sub>NO<sub>3</sub>SNa 516.1604; found 516.1607. FTIR (cm<sup>-1</sup>) 2924, 2358, 1664, 1461, 1215, 752.

### *N*-(1-(2-Naphthoyl)-3-(4-methoxyphenyl)bicyclo[2.1.1]hex-2-en-2-yl)-*N*,4-dimethylbenzenesulfonamide (**3b**)

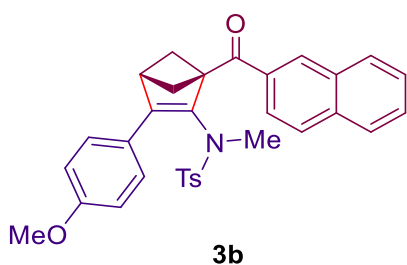

Following the general procedure, treatment of bicyclo[1.1.0]butan-1-yl(naphthalen-2-yl)methanone **1a** (42 mg, 0.2 mmol) and *N*-((4-methoxyphenyl)phenyl)ethynyl)-*N*,4-dimethylbenzenesulfonamide **2b** (126 mg, 0.4 mmol) with Sc(OTf)<sub>3</sub> (10 mg, 0.02 mmol) in CH<sub>2</sub>Cl<sub>2</sub> (2.0 mL) at 30 °C for 18 h followed by column chromatography (Pet. ether/EtOAc = 90/10) of the crude reaction mixture using silica gel afforded *N*-(1-(2-naphthoyl)-3-(4-methoxyphenyl)bicyclo[2.1.1]hex-2-en-2-yl)-*N*,4-dimethylbenzenesulfonamide **3b** as white solid (75 mg, 71% yield).

*R<sub>f</sub>* (Pet. ether/EtOAc = 90/10): 0.12; <sup>1</sup>H NMR (400 MHz, CDCl<sub>3</sub>) δ 8.47 (s, 1H), 8.04 (d, *J* = 8.6 Hz, 1H), 7.94 – 7.86 (m, 3H), 7.59 – 7.49 (m, 4H), 7.10 (d, *J* = 7.9 Hz, 2H), 6.77 (d, *J* = 8.6 Hz, 2H), 6.64 (d, *J* = 8.6 Hz, 2H), 3.77 (s, 3H), 3.36 (s, 2H), 3.13 (s, 2H), 3.05 (s, 1H), 2.98

(s, 3H), 2.31 (s, 3H).  $^{13}\text{C}$  NMR (100 MHz,  $\text{CDCl}_3$ )  $\delta$  198.2, 159.2, 147.8, 145.2, 143.6, 135.9, 135.4, 134.5, 132.4, 131.2, 129.6, 129.6, 128.3, 128.0, 127.9, 127.8, 127.4, 126.6, 125.7, 125.2, 113.7, 65.5, 55.3, 40.9, 37.8, 21.5 (2 signals in the aliphatic region are overlapping). HRMS (ESI)  $m/z$ :  $[\text{M}+\text{Na}]^+$  calcd for  $\text{C}_{32}\text{H}_{29}\text{NO}_4\text{SNa}$  546.1710; found 546.1714. FTIR ( $\text{cm}^{-1}$ ) 2988, 2357, 1662, 1506, 1346, 1155.

***N*-(1-(2-Naphthoyl)-3-(*p*-tolyl)bicyclo[2.1.1]hex-2-en-2-yl)-*N*,4-dimethylbenzene sulfonamide (3c)**

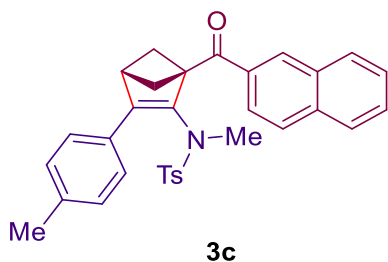

Following the general procedure, treatment of bicyclo[1.1.0]butan-1-yl(naphthalen-2-yl)methanone **1a** (42 mg, 0.2 mmol) and *N*,4-dimethyl-*N*-(*p*-tolylethynyl)benzenesulfonamide **2c** (119 mg, 0.4 mmol) with  $\text{Sc}(\text{OTf})_3$  (10 mg, 0.02 mmol) in  $\text{CH}_2\text{Cl}_2$  (2.0 mL) at 30 °C for 18 h followed by column chromatography (Pet. ether/EtOAc = 90/10) of the crude reaction mixture using silica gel afforded *N*-(1-(2-naphthoyl)-3-(*p*-tolyl)bicyclo[2.1.1]hex-2-en-2-yl)-*N*,4-dimethylbenzene sulfonamide **3c** as white solid (66 mg, 66% yield).

$R_f$  (Pet. ether/EtOAc = 85/15): 0.37;  $^1\text{H}$  NMR (400 MHz,  $\text{CDCl}_3$ )  $\delta$  8.48 (s, 1H), 8.06 (d,  $J$  = 8.6 Hz, 1H), 7.94 – 7.86 (m, 3H), 7.60 – 7.50 (m, 4H), 7.12 (d,  $J$  = 7.9 Hz, 2H), 6.91 (d,  $J$  = 7.8 Hz, 2H), 6.67 (d,  $J$  = 7.8 Hz, 2H), 3.38 (s, 2H), 3.14 (s, 2H), 3.05 (s, 1H), 2.97 (s, 3H), 2.34 (s, 3H), 2.30 (s, 3H).  $^{13}\text{C}$  NMR (100 MHz,  $\text{CDCl}_3$ )  $\delta$  198.0, 148.1, 146.4, 143.6, 137.8, 135.7, 135.4, 134.5, 132.4, 131.3, 130.3, 129.6, 128.9, 128.3, 128.0, 127.9, 127.4, 126.6, 126.4, 125.2, 65.7, 41.0, 37.9, 21.5, 21.3 (1 signal in the aromatic region and 2 signals in the aliphatic region are overlapping). HRMS (ESI)  $m/z$ :  $[\text{M}+\text{Na}]^+$  calcd for  $\text{C}_{32}\text{H}_{29}\text{NO}_3\text{SNa}$  530.1760; found 530.1761. FTIR ( $\text{cm}^{-1}$ ) 2990, 2358, 1663, 1463, 1350, 1159.

***N*-(1-(2-Naphthoyl)-3-(4-(*tert*-butyl)phenyl)bicyclo[2.1.1]hex-2-en-2-yl)-*N*,4-dimethylbenzenesulfonamide (3d)**

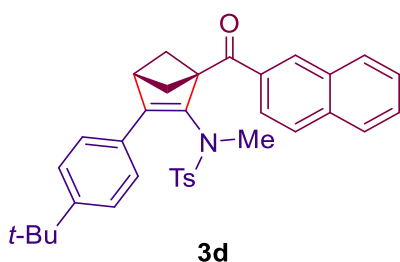

Following the general procedure, treatment of bicyclo[1.1.0]butan-1-yl(naphthalen-2-yl)methanone **1a** (42 mg, 0.2 mmol) and *N*-((4-(*tert*-butyl)phenyl)ethynyl)-*N*,4-dimethylbenzene sulfonamide **2d** (137 mg, 0.4 mmol) with  $\text{Sc}(\text{OTf})_3$  (10 mg, 0.02 mmol) in  $\text{CH}_2\text{Cl}_2$  (2.0 mL) at 30 °C for 18 h followed by column chromatography (Pet. ether/EtOAc = 90/10) of the crude reaction mixture using silica gel afforded *N*-(1-(2-

naphthoyl)-3-(4-(*tert*-butyl)phenyl)bicyclo[2.1.1]hex-2-en-2-yl)-*N*,4-dimethylbenzene sulfonamide **3d** as white solid (77 mg, 70% yield).

**R<sub>f</sub>** (Pet. ether/EtOAc = 90/10): 0.22; **<sup>1</sup>H NMR (400 MHz, CDCl<sub>3</sub>)** δ 8.47 (s, 1H), 8.06 (d, *J* = 8.5 Hz, 1H), 7.94 – 7.87 (m, 3H), 7.60 – 7.50 (m, 4H), 7.13 (d, *J* = 6.2 Hz, 4H), 6.77 (d, *J* = 8.2 Hz, 2H), 3.37 (s, 2H), 3.14 – 3.10 (m, 3H), 3.00 (s, 3H), 2.33 (s, 3H), 1.29 (s, 9H). **<sup>13</sup>C NMR (100 MHz, CDCl<sub>3</sub>)** δ 198.1, 151.0, 148.0, 146.5, 143.5, 135.8, 135.4, 134.5, 132.4, 131.2, 130.0, 129.7, 129.6, 128.3, 128.0, 127.9, 127.4, 126.6, 126.3, 125.2, 125.2, 65.7, 40.7, 37.9, 34.6, 31.3, 21.5 (2 signals in the aliphatic region are overlapping). **HRMS (ESI)** *m/z*: [M+Na]<sup>+</sup> calcd for C<sub>35</sub>H<sub>35</sub>NO<sub>3</sub>SNa 572.2230; found 572.2236. **FTIR (cm<sup>-1</sup>)** 2959, 2356, 1663, 1463, 1349, 1155.

***N*-(1-(2-Naphthoyl)-3-(4-bromophenyl)bicyclo[2.1.1]hex-2-en-2-yl)-*N*,4-dimethylbenzene sulfonamide (3e)**

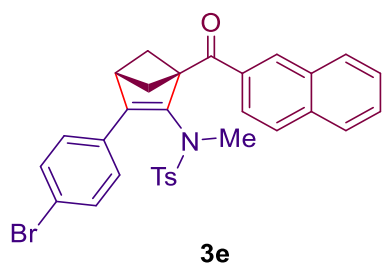

Following the general procedure, treatment of bicyclo[1.1.0] butan-1-yl(naphthalen-2-yl)methanone **1a** (42 mg, 0.2 mmol) and *N*-((4-bromophenyl)ethynyl)-*N*,4-dimethylbenzene sulfonamide **2e** (146 mg, 0.4 mmol) with Sc(OTf)<sub>3</sub> (10 mg, 0.02 mmol) in CH<sub>2</sub>Cl<sub>2</sub> (2.0 mL) at 30 °C for 18 h followed by column chromatography (Pet. ether/EtOAc = 90/10) of the crude reaction mixture using silica gel afforded *N*-(1-(2-naphthoyl)-3-(4-bromophenyl)bicyclo[2.1.1]hex-2-en-2-yl)-*N*,4-dimethylbenzenesulfonamide **3e** as white solid (60 mg, 53% yield).

**R<sub>f</sub>** (Pet. ether/EtOAc = 85/15): 0.39; **<sup>1</sup>H NMR (400 MHz, CDCl<sub>3</sub>)** δ 8.47 (s, 1H), 8.03 (d, *J* = 8.6 Hz, 1H), 7.94 (d, *J* = 8.1 Hz, 1H), 7.88 (t, *J* = 8.3 Hz, 2H), 7.58 (t, *J* = 7.5 Hz, 1H), 7.54 – 7.49 (m, 3H), 7.21 (d, *J* = 8.6 Hz, 2H), 7.10 (d, *J* = 7.9 Hz, 2H), 6.68 (d, *J* = 6.6 Hz, 2H), 3.39 (s, 2H), 3.14 (s, 2H), 3.02 (s, 1H), 2.97 (s, 3H), 2.34 (s, 3H). **<sup>13</sup>C NMR (100 MHz, CDCl<sub>3</sub>)** δ 197.9, 148.4, 147.3, 143.9, 135.8, 135.5, 134.3, 132.4, 132.0, 131.4, 131.3, 129.7, 128.4, 128.1, 128.0, 127.9, 127.3, 126.7, 125.1, 121.7, 65.7, 40.9, 38.0, 21.6 (1 signal in the aromatic region and 2 signals in the aliphatic region are overlapping). **HRMS (ESI)** *m/z*: [M+Na]<sup>+</sup> calcd for C<sub>31</sub>H<sub>26</sub>BrNO<sub>3</sub>SNa 594.0709; found 530.0719. **FTIR (cm<sup>-1</sup>)** 2990, 2357, 1663, 1479, 1349, 1160.

***N*-(1-(2-Naphthoyl)-3-(4-chlorophenyl)bicyclo[2.1.1]hex-2-en-2-yl)-*N*,4-dimethylbenzene sulfonamide (3f)**

Following the general procedure, treatment of bicyclo[1.1.0] butan-1-yl(naphthalen-2-yl)methanone **1a** (42 mg, 0.2 mmol) and *N*-((4-chlorophenyl)ethynyl)-*N*,4-dimethylbenzene

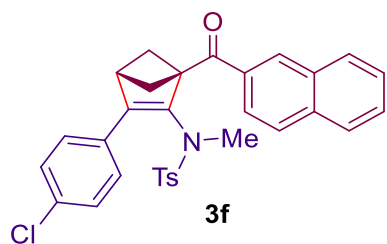

sulfonamide **2f** (129 mg, 0.4 mmol) with  $\text{Sc}(\text{OTf})_3$  (10 mg, 0.02 mmol) in  $\text{CH}_2\text{Cl}_2$  (2.0 mL) at 30 °C for 18 h followed by column chromatography (Pet. ether/EtOAc = 90/10) of the crude reaction mixture using silica gel afforded *N*-(1-(2-naphthoyl)-3-(4-chlorophenyl)bicyclo[2.1.1]hex-2-en-2-yl)-*N*,4-dimethylbenzenesulfonamide **3f** as white solid (89 mg, 85% yield).

$R_f$  (Pet. ether/EtOAc = 90/10): 0.3;  $^1\text{H NMR}$  (400 MHz,  $\text{CDCl}_3$ )  $\delta$  8.47 (s, 1H), 8.03 (d,  $J$  = 8.7 Hz, 1H), 7.94 (d,  $J$  = 8.7 Hz, 1H), 7.88 (t,  $J$  = 7.4 Hz, 2H), 7.58 (t,  $J$  = 6.9 Hz, 1H), 7.54-7.50 (m, 3H), 7.11-7.05 (m, 4H), 6.75 (d,  $J$  = 8.3 Hz, 2H), 3.39 (s, 2H), 3.14 (s, 2H), 3.02 (s, 1H), 2.97 (s, 3H), 2.34 (s, 3H).  $^{13}\text{C NMR}$  (100 MHz,  $\text{CDCl}_3$ )  $\delta$  198.0, 148.2, 147.3, 143.9, 135.8, 135.5, 134.4, 133.6, 132.4, 131.6, 131.3, 129.7, 129.7, 128.5, 128.4, 128.1, 127.9, 127.7, 127.4, 126.7, 125.1, 65.7, 41.0, 38.0, 21.6 (2 signals in the aliphatic region are overlapping). **HRMS (ESI)**  $m/z$ :  $[\text{M}+\text{Na}]^+$  calcd for  $\text{C}_{31}\text{H}_{26}\text{NClO}_3\text{SNa}$  550.1214; found 550.1227. **FTIR** ( $\text{cm}^{-1}$ ) 2994, 1762, 1664, 1594, 1488, 1352.

#### *N*-(1-(2-Naphthoyl)-3-(3-methoxyphenyl)bicyclo[2.1.1]hex-2-en-2-yl)-*N*,4-dimethylbenzenesulfonamide (**3g**)

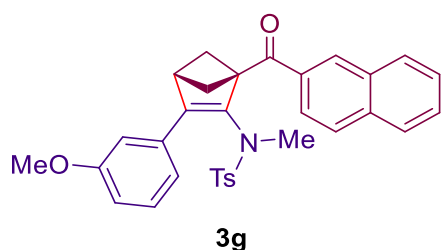

Following the general procedure, treatment of bicyclo[1.1.0]butan-1-yl(naphthalen-2-yl)methanone **1a** (42 mg, 0.2 mmol) and *N*-((3-methoxyphenyl)phenyl)ethynyl)-*N*,4-dimethylbenzenesulfonamide **2g** (126 mg, 0.4 mmol) with  $\text{Sc}(\text{OTf})_3$  (10 mg, 0.02 mmol) in

$\text{CH}_2\text{Cl}_2$  (2.0 mL) at 30 °C for 18 h followed by column chromatography (Pet. ether/EtOAc = 90/10) of the crude reaction mixture using silica gel afforded *N*-(1-(2-naphthoyl)-3-(3-methoxyphenyl)bicyclo[2.1.1]hex-2-en-2-yl)-*N*,4-dimethylbenzenesulfonamide **3g** as white solid (85 mg, 81% yield).

$R_f$  (Pet. ether/EtOAc = 90/10): 0.11;  $^1\text{H NMR}$  (400 MHz,  $\text{CDCl}_3$ )  $\delta$  8.48 (s, 1H), 8.04 (d,  $J$  = 8.6 Hz, 1H), 7.94 – 7.86 (m, 3H), 7.59 – 7.50 (m, 4H), 7.08 – 7.0 (m, 3H), 6.75 – 6.73 (m, 1H), 6.54 (s, 1H), 6.45 (d,  $J$  = 7.6 Hz, 1H), 3.68 (s, 3H), 3.41 (s, 2H), 3.14 (s, 2H), 3.06 (s, 1H), 2.99 (s, 3H), 2.30 (s, 3H).  $^{13}\text{C NMR}$  (100 MHz,  $\text{CDCl}_3$ )  $\delta$  198.0, 159.5, 147.7, 143.7, 135.4, 134.5, 134.4, 132.4, 131.3, 129.7, 129.6, 129.2, 128.3, 128.0, 127.9, 127.4, 126.6, 125.2, 119.0, 113.5, 112.1, 65.7, 55.2, 41.1, 37.9, 21.5 (2 signals in the aromatic region and 2 signals in the aliphatic region are overlapping). **HRMS (ESI)**  $m/z$ :  $[\text{M}+\text{Na}]^+$  calcd for  $\text{C}_{32}\text{H}_{29}\text{NO}_4\text{SNa}$  546.1710; found 546.1711. **FTIR** ( $\text{cm}^{-1}$ ) 2991, 2358, 1663, 1467, 1348, 1157.



***N*-(1-(2-Naphthoyl)-3-(*m*-tolyl)bicyclo[2.1.1]hex-2-en-2-yl)-*N*,4-dimethylbenzene sulfonamide (**3h**)**

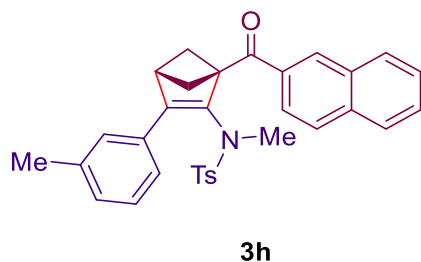

Following the general procedure, treatment of bicyclo[1.1.0] butan-1-yl(naphthalen-2-yl)methanone **1a** (42 mg, 0.2 mmol) and *N*,4-dimethyl-*N*-(*m*-tolylethynyl)benzenesulfonamide **2h** (119 mg, 0.4 mmol) with Sc(OTf)<sub>3</sub> (10 mg, 0.02 mmol) in CH<sub>2</sub>Cl<sub>2</sub> (2.0 mL) at 30 °C for 18 h followed by column chromatography (Pet. ether/EtOAc = 90/10) of the crude reaction mixture using silica gel afforded *N*-(1-(2-naphthoyl)-3-(*m*-tolyl)bicyclo[2.1.1]hex-2-en-2-yl)-*N*,4-dimethylbenzenesulfonamide **3h** as white solid (71 mg, 70% yield).

**R<sub>f</sub>** (Pet. ether/EtOAc = 85/15): 0.38; **<sup>1</sup>H NMR (400 MHz, CDCl<sub>3</sub>)** δ 8.49 (s, 1H), 8.07 (d, *J* = 8.6 Hz, 1H), 7.94 – 7.87 (m, 3H), 7.60 – 7.56 (m, 3H), 7.51 (t, *J* = 7.4 Hz, 1H), 7.16 (d, *J* = 7.9 Hz, 2H), 7.03 (t, *J* = 7.8 Hz, 1H), 6.98 (d, *J* = 7.6 Hz, 1H), 6.67 (d, *J* = 7.6 Hz, 1H), 6.43 (s, 1H), 3.38 (s, 2H), 3.16 (s, 2H), 3.07 (s, 1H), 2.95 (s, 3H), 2.35 (s, 3H), 2.08 (s, 3H). **<sup>13</sup>C NMR (100 MHz, CDCl<sub>3</sub>)** δ 197.8, 147.8, 147.2, 143.6, 137.8, 135.6, 135.5, 134.5, 133.2, 132.5, 131.3, 129.8, 129.7, 128.6, 128.3, 128.2, 128.1, 127.9, 127.5, 127.2, 126.6, 125.3, 123.6, 65.9, 41.1, 37.8, 21.6, 21.3 (2 signals in the aliphatic region are overlapping). **HRMS (ESI)** *m/z*: [M+Na]<sup>+</sup> calcd for C<sub>32</sub>H<sub>29</sub>NO<sub>3</sub>SNa 530.1760; found 530.1779. **FTIR (cm<sup>-1</sup>)** 2989, 2357, 1665, 1464, 1350, 1158.

***N*-(1-(2-Naphthoyl)-3-(3-chlorophenyl)bicyclo[2.1.1]hex-2-en-2-yl)-*N*,4-dimethylbenzene sulfonamide (**3i**)**

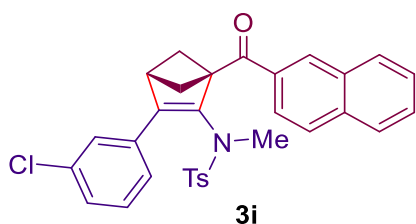

Following the general procedure, treatment of bicyclo[1.1.0] butan-1-yl(naphthalen-2-yl)methanone **1a** (42 mg, 0.2 mmol) and *N*-((3-chlorophenyl)ethynyl)-*N*,4-dimethylbenzenesulfonamide **2i** (129 mg, 0.4 mmol) with Sc(OTf)<sub>3</sub> (10 mg, 0.02 mmol) in CH<sub>2</sub>Cl<sub>2</sub> (2.0 mL) at 30 °C for 18 h followed by column chromatography (Pet. ether/EtOAc = 90/10) of the crude reaction mixture using silica gel afforded *N*-(1-(2-naphthoyl)-3-(3-chlorophenyl)bicyclo[2.1.1]hex-2-en-2-yl)-*N*,4-dimethylbenzene sulfonamide **3i** as white solid (83 mg, 79% yield).

**R<sub>f</sub>** (Pet. ether/EtOAc = 90/10): 0.35; **<sup>1</sup>H NMR (400 MHz, CDCl<sub>3</sub>)** δ 8.47 (s, 1H), 8.05 (d, *J* = 9.2 Hz, 1H), 7.95 – 7.86 (m, 3H), 7.56 – 7.50 (m, 4H), 7.17 – 7.12 (m, 3H), 7.09-7.05 (m, 1H), 6.80 (d, *J* = 6.9 Hz, 1H), 6.51 (s, 1H), 3.39 (s, 2H), 3.16 (s, 2H), 3.03 (s, 1H), 2.96 (s, 3H), 2.35 (s, 3H). **<sup>13</sup>C NMR (100 MHz, CDCl<sub>3</sub>)** δ 197.6, 149.0, 146.6, 144.1, 135.5, 135.3, 135.0, 134.4, 134.3, 132.5, 131.3, 130.0, 129.7, 129.5, 128.7, 128.1, 128.0, 127.7, 127.2, 126.7, 126.4, 125.2,

124.6, 65.9, 41.1, 38.0, 21.6 (2 signals in the aliphatic region are overlapping). **HRMS (ESI)** m/z:  $[M+Na]^+$  calcd for  $C_{31}H_{26}NClO_3SNa$  550.1214; found 550.1220. **FTIR (cm<sup>-1</sup>)** 2994, 2357, 1757, 1664, 1594, 1469.

***N*-(1-(2-Naphthoyl)-3-(*o*-tolyl)bicyclo[2.1.1]hex-2-en-2-yl)-*N*,4-dimethylbenzenesulfonamide (3j)**

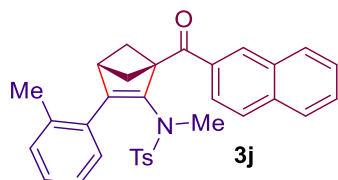

Following the general procedure, treatment of bicyclo[1.1.0]butan-1-yl(naphthalen-2-yl)methanone **1a** (42 mg, 0.2 mmol) and *N*,4-dimethyl-*N*-(*o*-tolylethynyl)benzenesulfonamide **2j** (119 mg, 0.4 mmol) with  $Sc(OTf)_3$  (10 mg, 0.02 mmol) in  $CH_2Cl_2$  (2.0 mL) at 30 °C for 18 h followed by column chromatography (Pet. ether/EtOAc = 90/10) of the crude reaction mixture using silica gel afforded *N*-(1-(2-naphthoyl)-3-(*o*-tolyl)bicyclo[2.1.1]hex-2-en-2-yl)-*N*,4-dimethylbenzenesulfonamide **3j** as white solid (60 mg, 59% yield).

**R<sub>f</sub>** (Pet. ether/EtOAc = 85/15): 0.35; **<sup>1</sup>H NMR (400 MHz, CDCl<sub>3</sub>)** δ 8.61 (s, 1H), 8.12 (dd,  $J_1 = 8.6$  Hz,  $J_2 = 1.8$  Hz, 1H), 7.99 (d,  $J = 7.1$  Hz, 1H), 7.93 – 7.87 (m, 2H), 7.61 – 7.51 (m, 2H), 7.35 (d,  $J = 8.2$  Hz, 2H), 7.14 – 7.08 (m, 4H), 6.79 – 6.74 (m, 1H), 6.16 (d,  $J = 7.6$  Hz, 1H), 3.48 (dd,  $J_1 = 1.3$  Hz,  $J_2 = 1.8$  Hz, 2H), 3.13 (t,  $J = 3.1$  Hz, 2H), 2.77 (s, 4H), 2.36 (s, 3H), 2.30 (s, 3H). **<sup>13</sup>C NMR (100 MHz, CDCl<sub>3</sub>)** δ 197.9, 149.1, 148.8, 143.5, 135.6, 135.0, 134.5, 133.9, 132.6, 131.9, 130.2, 129.9, 129.5, 128.9, 128.4, 128.2, 128.0, 127.9, 127.6, 126.6, 125.5, 125.1, 65.1, 42.3, 38.1, 21.6, 20.8 (1 signal in the aromatic region and 2 signals in the aliphatic region are overlapping). **HRMS (ESI)** m/z:  $[M+Na]^+$  calcd for  $C_{32}H_{29}NO_3SNa$  530.1760; found 530.1768. **FTIR (cm<sup>-1</sup>)** 2990, 2356, 1663, 1463, 1350, 1159.

***N*-(1-(2-Naphthoyl)-3-(naphthalen-2-yl)bicyclo[2.1.1]hex-2-en-2-yl)-*N*,4-dimethylbenzenesulfonamide (3k)**

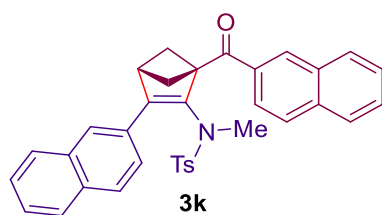

Following the general procedure, treatment of bicyclo[1.1.0]butan-1-yl(naphthalen-2-yl)methanone **1a** (42 mg, 0.2 mmol) and *N*,4-dimethyl-*N*-(naphthalen-2-ylethynyl)benzenesulfonamide **2k** (135 mg, 0.4 mmol) with  $Sc(OTf)_3$  (10 mg, 0.02 mmol) in  $CH_2Cl_2$  (2.0 mL) at 30 °C for 18 h followed by column chromatography (Pet. ether/EtOAc = 90/10) of the crude reaction mixture using silica gel afforded *N*-(1-(2-naphthoyl)-3-(naphthalen-2-yl)bicyclo[2.1.1]hex-2-en-2-yl)-*N*,4-dimethylbenzenesulfonamide **3k** as white solid (75 mg, 69% yield).

**R<sub>f</sub>** (Pet. ether/EtOAc = 90/10): 0.3; **<sup>1</sup>H NMR (400 MHz, CDCl<sub>3</sub>)** δ 8.52 (s, 1H), 8.09 (d,  $J = 8.8$  Hz, 1H), 7.96 – 7.87 (m, 3H), 7.80 – 7.73 (m, 1H), 7.61 – 7.56 (m, 3H), 7.54 – 7.52 (m,

2H), 7.43 (s, 3H), 7.12 – 7.10 (m, 3H), 7.02 (d,  $J = 8.8$  Hz, 1H), 3.46 (s, 2H), 3.21 (s, 3H), 3.01 (s, 3H), 2.96 (s, 3H).  $^{13}\text{C}$  NMR (100 MHz,  $\text{CDCl}_3$ )  $\delta$  200.8, 149.7, 148.8, 148.7, 147.4, 147.0, 147.0, 143.5, 136.6, 136.5, 135.4, 134.1, 132.9, 132.2, 130.9, 129.6, 128.3, 128.3, 128.2, 128.2, 127.7, 127.6, 127.4, 126.5, 126.4, 126.3, 124.0, 66.5, 40.2, 37.9, 21.6 (2 signals in the aliphatic region are overlapping). HRMS (ESI)  $m/z$ :  $[\text{M}+\text{Na}]^+$  calcd for  $\text{C}_{35}\text{H}_{29}\text{NO}_3\text{SNa}$  566.1760; found 566.1763. FTIR ( $\text{cm}^{-1}$ ) 2986, 2357, 1761, 1663, 1501, 1462.

***N*-(1-(2-Naphthoyl)-3-(thiophen-2-yl)bicyclo[2.1.1]hex-2-en-2-yl)-*N*,4-dimethylbenzene sulfonamide (3l)**

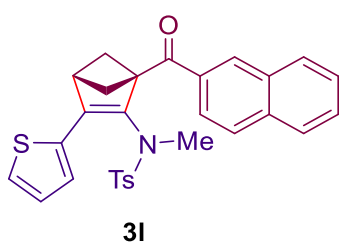

Following the general procedure, treatment of bicyclo[1.1.0]butan-1-yl(naphthalen-2-yl)methanone **1a** (42 mg, 0.2 mmol) and *N*,4-dimethyl-*N*-(thiophen-2-ylethynyl)benzenesulfonamide **2l** (117 mg, 0.4 mmol) with  $\text{Sc}(\text{OTf})_3$  (10 mg, 0.02 mmol) in  $\text{CH}_2\text{Cl}_2$  (2.0 mL) at 30 °C for 18 h followed by column chromatography

(Pet. ether/EtOAc = 90/10) of the crude reaction mixture using silica gel afforded *N*-(1-(2-naphthoyl)-3-(thiophen-2-yl)bicyclo[2.1.1]hex-2-en-2-yl)-*N*,4-dimethylbenzenesulfonamide **3l** as white solid (65 mg, 65% yield).

$R_f$  (Pet. ether/EtOAc = 90/10): 0.18;  $^1\text{H}$  NMR (400 MHz,  $\text{CDCl}_3$ )  $\delta$  8.39 (s, 1H), 7.98 – 7.86 (m, 5H), 7.60 – 7.51 (m, 4H), 7.19 (d,  $J = 5.1$  Hz, 1H), 7.05 (d,  $J = 8.0$  Hz, 2H), 6.90 – 6.88 (m, 1H), 6.65 (d,  $J = 3.5$  Hz, 1H), 3.38 (s, 2H), 3.15 (s, 2H), 3.11 (s, 1H), 3.10 (s, 3H), 2.26 (s, 3H).  $^{13}\text{C}$  NMR (100 MHz,  $\text{CDCl}_3$ )  $\delta$  198.1, 145.1, 143.6, 143.1, 136.7, 135.4, 135.0, 134.5, 132.4, 131.0, 129.6, 129.6, 128.4, 128.1, 127.9, 127.4, 127.2, 126.7, 126.4, 125.4, 125.1, 65.5, 41.9, 37.6, 21.5 (2 signals in the aliphatic region are overlapping). HRMS (ESI)  $m/z$ :  $[\text{M}+\text{Na}]^+$  calcd for  $\text{C}_{29}\text{H}_{25}\text{NO}_3\text{S}_2\text{Na}$  522.1168; found 522.1176. FTIR ( $\text{cm}^{-1}$ ) 2987, 2358, 1662, 1462, 1347, 1155.

***N*-(1-(2-Naphthoyl)-3-phenylbicyclo[2.1.1]hex-2-en-2-yl)-4-chloro-*N*-methylbenzene sulfonamide (3m)**

Following the general procedure, treatment of bicyclo[1.1.0]butan-1-yl(naphthalen-2-yl)methanone **1a** (42 mg, 0.2 mmol) and 4-chloro-*N*-methyl-*N*-(phenylethynyl)benzenesulfonamide **2m** (122 mg, 0.4 mmol) with  $\text{Sc}(\text{OTf})_3$  (10 mg, 0.02 mmol) in  $\text{CH}_2\text{Cl}_2$  (2.0 mL) at 30 °C for 18 h followed by column chromatography (Pet. ether/EtOAc = 90/10) of the crude reaction mixture using silica gel afforded *N*-(1-(2-naphthoyl)-3-

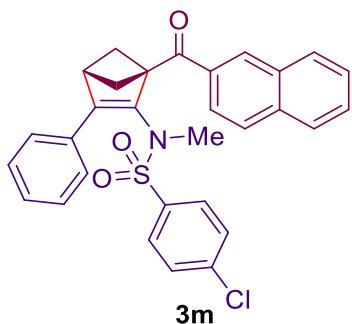

phenylbicyclo[2.1.1]hex-2-en-2-yl)-4-chloro-*N*-methylbenzenesulfonamide **3m** as white solid (60 mg, 59% yield).

$R_f$  (Pet. ether/EtOAc = 90/10): 0.24;  $^1\text{H NMR}$  (400 MHz,  $\text{CDCl}_3$ )  $\delta$  8.48 (s, 1H), 8.02 (dd,  $J$  = 8.6, 1.7 Hz, 1H), 7.94 (d,  $J$  = 7.9 Hz, 1H), 7.89 (t,  $J$  = 8.0 Hz, 2H), 7.59 (t,  $J$  = 8.3 Hz, 1H), 7.54 (d,  $J$  = 8.7 Hz, 3H), 7.23 – 7.14 (m, 5H), 6.92 (d,  $J$  = 7.0 Hz,

2H), 3.42 – 3.41 (m, 2H), 3.17 – 3.15 (m, 2H), 3.09 (t,  $J$  = 2.7 Hz, 1H), 3.03 (s, 3H).  $^{13}\text{C NMR}$  (100 MHz,  $\text{CDCl}_3$ )  $\delta$  198.2, 149.3, 147.2, 139.3, 137.6, 135.5, 134.4, 132.9, 132.5, 131.3, 129.7, 129.2, 128.8, 128.5, 128.5, 128.2, 128.1, 128.0, 126.8, 126.4, 125.0, 65.5, 41.0, 38.4 (2 signals in the aliphatic region are overlapping). **HRMS (ESI)**  $m/z$ :  $[\text{M}+\text{Na}]^+$  calcd for  $\text{C}_{31}\text{H}_{27}\text{NO}_3\text{SNa}$  536.1058; found 536.1064. **FTIR** ( $\text{cm}^{-1}$ ) 3059, 2988, 1664, 1470, 1353, 1159, 753.

#### *N*-(1-(2-Naphthoyl)-3-phenylbicyclo[2.1.1]hex-2-en-2-yl)-*N*-methyl-[1,1'-biphenyl]-4-sulfonamide (**3n**)

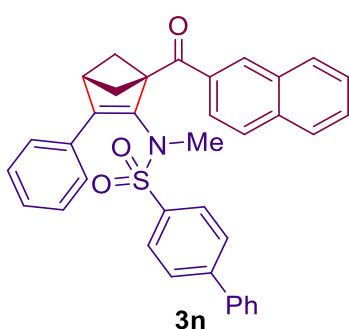

Following the general procedure, treatment of bicyclo[1.1.0]butan-1-yl(naphthalen-2-yl)methanone **1a** (42 mg, 0.2 mmol) and *N*-methyl-*N*-(phenylethynyl)-[1,1'-biphenyl]-4-sulfonamide **2n** (139 mg, 0.4 mmol) with  $\text{Sc}(\text{OTf})_3$  (10 mg, 0.02 mmol) in  $\text{CH}_2\text{Cl}_2$  (2.0 mL) at 30 °C for 18 h followed by column chromatography (Pet. ether/EtOAc = 90/10) of the crude reaction mixture using silica gel afforded

*N*-(1-(2-naphthoyl)-3-phenylbicyclo[2.1.1]hex-2-en-2-yl)-*N*-methyl-[1,1'-biphenyl]-4-sulfonamide **3n** as white solid (59 mg, 53% yield).

$R_f$  (Pet. ether/EtOAc = 90/10): 0.26;  $^1\text{H NMR}$  (400 MHz,  $\text{CDCl}_3$ )  $\delta$  8.51 (s, 1H), 8.06 (dd,  $J$  = 8.6, 1.8 Hz, 1H), 7.94 (d,  $J$  = 8.1 Hz, 1H), 7.91 – 7.86 (m, 2H), 7.72 (d,  $J$  = 8.5 Hz, 2H), 7.58 (t,  $J$  = 6.8 Hz, 1H), 7.54 – 7.41 (m, 8H), 7.14 – 7.06 (m, 3H), 6.85 (d,  $J$  = 8.1 Hz, 2H), 3.44 – 3.44 (m, 2H), 3.19 – 3.17 (m, 2H), 3.10 (t,  $J$  = 2.7 Hz, 1H), 3.04 (s, 3H).  $^{13}\text{C NMR}$  (100 MHz,  $\text{CDCl}_3$ )  $\delta$  198.1, 148.6, 147.4, 145.8, 139.5, 137.3, 135.5, 134.5, 133.1, 132.2, 131.3, 129.7, 129.1, 128.5, 128.4, 128.1, 128.0, 127.9, 127.9, 127.7, 127.4, 126.7, 126.5, 125.2, 65.7, 41.1, 38.2 (1 signal in the aromatic region and 2 signals in the aliphatic region are overlapping). **HRMS (ESI)**  $m/z$ :  $[\text{M}+\text{Na}]^+$  calcd for  $\text{C}_{36}\text{H}_{29}\text{NO}_3\text{SNa}$  578.1760; found 578.1766. **FTIR** ( $\text{cm}^{-1}$ ) 3057, 2985, 1666, 1472, 1353, 1160, 759.

***N*-(1-(2-Naphthoyl)-3-phenylbicyclo[2.1.1]hex-2-en-2-yl)-*N*,3-dimethylbenzene sulfonamide (3o)**

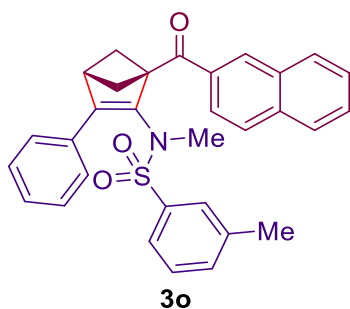

Following the general procedure, treatment of bicyclo[1.1.0]butan-1-yl(naphthalen-2-yl)methanone **1x** (42 mg, 0.2 mmol) and *N*,3-dimethyl-*N*-(phenylethynyl)benzene sulfonamide **2o** (114 mg, 0.4 mmol) with Sc(OTf)<sub>3</sub> (10 mg, 0.02 mmol) in CH<sub>2</sub>Cl<sub>2</sub> (2.0 mL) at 30 °C for 18 h followed by column chromatography (Pet. ether/EtOAc = 90/10) of the crude reaction

mixture using silica gel afforded *N*-(1-(2-naphthoyl)-3-phenylbicyclo[2.1.1]hex-2-en-2-yl)-*N*,3-dimethylbenzenesulfonamide **3o** as white solid (60 mg, 61% yield).

**R<sub>f</sub>** (Pet. ether/EtOAc = 90/10): 0.27; **<sup>1</sup>H NMR (400 MHz, CDCl<sub>3</sub>)** δ 8.50 (s, 1H), 8.06 (dd, *J* = 8.6, 1.8 Hz, 1H), 7.94 (d, *J* = 8.1 Hz, 1H), 7.89 (t, *J* = 8.6 Hz, 2H), 7.58 (t, *J* = 6.8 Hz, 1H), 7.54 – 7.48 (m, 2H), 7.45 (s, 1H), 7.26 – 7.23 (m, 2H), 7.17 (t, *J* = 7.3 Hz, 1H), 7.11 (t, *J* = 7.3 Hz, 2H), 6.84 (d, *J* = 6.9 Hz, 2H), 3.41 – 3.40 (m, 2H), 3.16 – 3.14 (m, 2H), 3.08 (t, *J* = 2.7 Hz, 1H), 2.98 (s, 3H), 2.24 (s, 3H). **<sup>13</sup>C NMR (100 MHz, CDCl<sub>3</sub>)** δ 198.0, 148.3, 147.4, 139.4, 138.5, 135.5, 134.5, 133.6, 133.1, 132.5, 131.3, 129.7, 128.9, 128.3, 128.1, 127.9, 127.9, 127.8, 126.6, 126.5, 125.2, 124.7, 65.7, 41.0, 38.0, 21.3 (*1 signal in the aromatic region and 2 signals in the aliphatic region are overlapping*). **HRMS (ESI) m/z:** [M+Na]<sup>+</sup> calcd for C<sub>31</sub>H<sub>27</sub>NO<sub>3</sub>SNa 516.1604; found 516.1609. **FTIR (cm<sup>-1</sup>)** 3058, 2943, 1664, 1468, 1350, 1153, 756.

***N*-(1-(2-Naphthoyl)-3-phenylbicyclo[2.1.1]hex-2-en-2-yl)-*N*-methylbutane-1-sulfonamide (3p)**

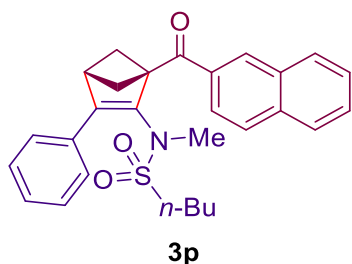

Following the general procedure, treatment of bicyclo[1.1.0]butan-1-yl(naphthalen-2-yl)methanone **1a** (42 mg, 0.2 mmol) and *N*-methyl-*N*-(phenylethynyl)butane-1-sulfonamide **2p** (101 mg, 0.4 mmol) with Sc(OTf)<sub>3</sub> (10 mg, 0.02 mmol) in CH<sub>2</sub>Cl<sub>2</sub> (2.0 mL) at 30 °C for 18 h followed by column chromatography (Pet. ether/EtOAc = 95/05) of the crude

reaction mixture using silica gel afforded *N*-(1-(2-naphthoyl)-3-phenylbicyclo[2.1.1]hex-2-en-2-yl)-*N*-methylbutane-1-sulfonamide **3p** as white solid (51 mg, 55% yield).

**R<sub>f</sub>** (Pet. ether/EtOAc = 95/05): 0.25; **<sup>1</sup>H NMR (400 MHz, CDCl<sub>3</sub>)** δ 8.58 (s, 1H), 8.06 (d, *J* = 8.6 Hz, 1H), 7.97 (d, *J* = 8.2 Hz, 1H), 7.92 – 7.87 (m, 2H), 7.62 – 7.53 (m, 4H), 7.41 (t, *J* = 6.7 Hz, 2H), 7.33 – 7.29 (m, 1H), 3.44 – 4.43 (m, 2H), 3.13 – 3.09 (m, 6H), 2.56 – 2.52 (m, 2H), 1.50 – 1.42 (m, 2H), 1.06 – 0.96 (m, 2H), 0.61 (t, *J* = 7.4 Hz, 3H). **<sup>13</sup>C NMR (100 MHz, CDCl<sub>3</sub>)**

$\delta$  199.5, 149.4, 148.0, 135.6, 134.2, 133.2, 132.5, 131.7, 129.9, 128.8, 128.8, 128.4, 128.2, 127.9, 126.9, 126.8, 124.8, 65.0, 52.8, 40.7, 38.2, 25.1, 21.5, 13.3 (2 signals in the aliphatic region are overlapping). **HRMS (ESI)**  $m/z$ :  $[M+Na]^+$  calcd for  $C_{28}H_{29}NO_3SNa$  482.1760; found 482.1766. **FTIR** ( $cm^{-1}$ ) 3276, 2957, 1693, 1403, 1349, 1155.

***N*-(1-(2-Naphthoyl)-3-phenylbicyclo[2.1.1]hex-2-en-2-yl)-*N*-methylcyclopropane sulfonamide (3q)**

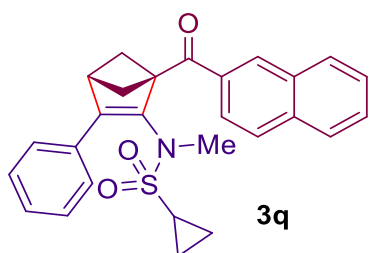

Following the general procedure, treatment of bicyclo[1.1.0]butan-1-yl(naphthalen-2-yl)methanone **1a** (42 mg, 0.2 mmol) and *N*-methyl-*N*-(phenylethynyl)cyclopropane sulfonamide **2q** (94 mg, 0.4 mmol) with  $Sc(OTf)_3$  (10 mg, 0.02 mmol) in  $CH_2Cl_2$  (2.0 mL) at 30 °C for 18 h followed by column chromatography (Pet. ether/EtOAc = 90/10) of the crude

reaction mixture using silica gel afforded *N*-(1-(2-naphthoyl)-3-phenylbicyclo[2.1.1]hex-2-en-2-yl)-*N*-methylcyclopanesulfonamide **3q** as white solid (56 mg, 64% yield).

**R<sub>f</sub>** (Pet. ether/EtOAc = 90/10): 0.37; **<sup>1</sup>H NMR (400 MHz, CDCl<sub>3</sub>)**  $\delta$  8.54 (s, 1H), 8.05 (d,  $J$  = 8.6 Hz, 1H), 7.96 (d,  $J$  = 8.0 Hz, 1H), 7.91 – 7.86 (m, 2H), 7.60 – 7.57 (m, 3H), 7.53 (t,  $J$  = 7.4 Hz, 1H), 7.41 (t,  $J$  = 7.6 Hz, 2H), 7.30 (t,  $J$  = 7.3 Hz, 1H), 3.44 – 3.39 (m, 2H), 3.14 – 3.10 (m, 6H), 1.97 – 1.90 (m, 1H), 1.03 – 0.99 (m, 2H), 0.70 – 0.65 (m, 2H). **<sup>13</sup>C NMR (100 MHz, CDCl<sub>3</sub>)**  $\delta$  199.2, 148.3, 148.1, 135.5, 134.4, 133.2, 132.4, 131.4, 129.8, 128.7, 128.6, 128.3, 128.1, 127.8, 126.8, 126.8, 124.9, 65.1, 40.8, 38.3, 29.7, 5.5 (2 signals in the aliphatic region are overlapping). **HRMS (ESI)**  $m/z$ :  $[M+Na]^+$  calcd for  $C_{27}H_{25}NO_3SNa$  466.1447; found 466.1454. **FTIR** ( $cm^{-1}$ ) 3056, 2944, 1661, 1464, 1340, 1141, 728.

***N*-(1-(2-Naphthoyl)-3-phenylbicyclo[2.1.1]hex-2-en-2-yl)-*N*-methylmethanesulfonamide (3r)**

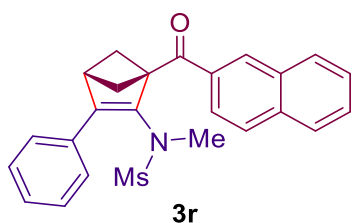

Following the general procedure, treatment of bicyclo[1.1.0]butan-1-yl(naphthalen-2-yl)methanone **1a** (42 mg, 0.2 mmol) and *N*-methyl-*N*-(phenylethynyl)methanesulfonamide **2r** (84 mg, 0.4 mmol) with  $Sc(OTf)_3$  (10 mg, 0.02 mmol) in  $CH_2Cl_2$  (2.0 mL) at 30 °C for 18 h followed by column chromatography (Pet.

ether/EtOAc = 90/10) of the crude reaction mixture using silica gel afforded *N*-(1-(2-naphthoyl)-3-phenylbicyclo[2.1.1]hex-2-en-2-yl)-*N*-methylmethanesulfonamide **3r** as white solid (60 mg, 72% yield).

**R<sub>f</sub>** (Pet. ether/EtOAc = 90/10): 0.24; **<sup>1</sup>H NMR (400 MHz, CDCl<sub>3</sub>)** δ 8.57 (s, 1H), 8.06 (d, *J* = 8.5 Hz, 1H), 7.97 (d, *J* = 8.1 Hz, 1H), 7.90 (dd, *J*<sub>1</sub> = 13.2 Hz, *J*<sub>2</sub> = 8.4 Hz, 2H), 7.63 – 7.55 (m, 4H), 7.42 (t, *J* = 7.6 Hz, 2H), 7.31 (t, *J* = 7.4 Hz, 1H), 3.44 (s, 2H), 3.13 (s, 1H), 3.11 (s, 2H), 3.08 (s, 3H), 2.53 (s, 3H). **<sup>13</sup>C NMR (100 MHz, CDCl<sub>3</sub>)** δ 199.5, 149.0, 147.5, 135.5, 134.1, 133.0, 132.4, 131.5, 129.8, 128.8, 128.7, 128.4, 128.2, 127.9, 126.9, 126.7, 124.7, 67.9, 64.7, 40.6, 39.4, 37.5 (*1 signal in the aliphatic region is overlapping*). **HRMS (ESI)** *m/z*: [M+Na]<sup>+</sup> calcd for C<sub>25</sub>H<sub>23</sub>NO<sub>3</sub>SNa 440.1291; found 440.1295. **FTIR (cm<sup>-1</sup>)** 3012, 2358, 1660, 1462, 1333, 1146.

***N*-(1-(2-Naphthoyl)-3-phenylbicyclo[2.1.1]hex-2-en-2-yl)-*N*-ethyl-4-methylbenzene sulfonamide (3s)**

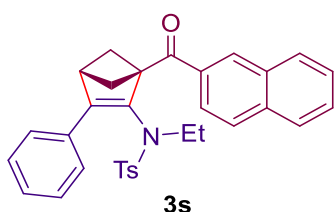

Following the general procedure, treatment of bicyclo[1.1.0]butan-1-yl(naphthalen-2-yl)methanone **1a** (42 mg, 0.2 mmol) and *N*-ethyl-4-methyl-*N*-(phenylethynyl)benzenesulfonamide **2s** (120 mg, 0.4 mmol) with Sc(OTf)<sub>3</sub> (10 mg, 0.02 mmol) in CH<sub>2</sub>Cl<sub>2</sub> (2.0 mL) at 30 °C for 18 h followed by column chromatography (Pet. ether/EtOAc = 90/10) of the crude reaction mixture using silica gel afforded *N*-(1-(2-naphthoyl)-3-phenylbicyclo[2.1.1]hex-2-en-2-yl)-*N*-ethyl-4-methylbenzene sulfonamide **3s** as white solid (64 mg, 63% yield).

**R<sub>f</sub>** (Pet. ether/EtOAc = 90/10): 0.25; **<sup>1</sup>H NMR (400 MHz, CDCl<sub>3</sub>)** δ 8.53 (s, 1H), 8.06 (dd, *J*<sub>1</sub> = 8.6 Hz, *J*<sub>2</sub> = 1.6 Hz, 1H), 7.96 (d, *J* = 8.0 Hz, 1H), 7.88 (t, *J* = 8.5 Hz, 2H), 7.61 – 7.50 (m, 4H), 7.20 – 7.11 (m, 5H), 6.90 – 6.88 (m, 2H), 3.45 (s, 2H), 3.29 – 3.13 (m, 4H), 3.04 (t, *J* = 2.5 Hz, 1H), 2.33 (s, 3H), 1.11 (t, *J* = 7.1 Hz, 3H). **<sup>13</sup>C NMR (100 MHz, CDCl<sub>3</sub>)** δ 198.7, 135.4, 135.0, 133.6, 132.4, 131.2, 129.8, 129.7, 128.3, 128.2, 128.0, 127.9, 127.8, 127.7, 126.7, 126.6, 125.3, 65.2, 43.8, 41.8, 21.5, 14.2 (*4 signals in the aromatic region and 2 signals in the aliphatic region are overlapping*). **HRMS (ESI)** *m/z*: [M+Na]<sup>+</sup> calcd for C<sub>32</sub>H<sub>29</sub>NO<sub>3</sub>SNa 530.1760; found 530.1761. **FTIR (cm<sup>-1</sup>)** 2984, 2358, 1662, 1449, 1371, 1157.

***N*-(1-(2-Naphthoyl)-3-phenylbicyclo[2.1.1]hex-2-en-2-yl)-*N*-butyl-4-methylbenzene sulfonamide (3t)**

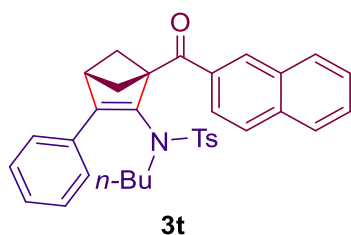

Following the general procedure, treatment of bicyclo[1.1.0]butan-1-yl(naphthalen-2-yl)methanone **1a** (42 mg, 0.2 mmol) and *N*-butyl-4-methyl-*N*-(phenylethynyl)benzenesulfonamide **2t** (131 mg, 0.4 mmol) with Sc(OTf)<sub>3</sub> (10 mg, 0.02 mmol) in CH<sub>2</sub>Cl<sub>2</sub> (2.0 mL) at 30



°C for 18 h followed by column chromatography (Pet. ether/EtOAc = 95/05) of the crude reaction mixture using silica gel afforded *N*-(1-(2-naphthoyl)-3-phenylbicyclo[2.1.1]hex-2-en-2-yl)-*N*-butyl-4-methylbenzenesulfonamide **3t** as white solid (66 mg, 62% yield).

**R<sub>f</sub>** (Pet. ether/EtOAc = 95/05): 0.21; **<sup>1</sup>H NMR (400 MHz, CDCl<sub>3</sub>)** δ 8.50 (s, 1H), 8.05 (d, *J* = 8.6 Hz, 1H), 7.95 (d, *J* = 7.8 Hz, 1H), 7.88 (t, *J* = 8.0 Hz, 2H), 7.62 – 7.50 (m, 4H), 7.18 – 7.10 (m, 5H), 6.84 (d, *J* = 8.3 Hz, 2H), 3.44 (s, 2H), 3.20 – 3.12 (m, 5H), 3.01 (s, 1H), 2.35 (s, 3H), 1.49 – 1.37 (m, 2H), 1.15 – 1.06 (m, 2H), 0.69 (t, *J* = 7.4 Hz, 3H). **<sup>13</sup>C NMR (100 MHz, CDCl<sub>3</sub>)** δ 198.8, 148.1, 145.1, 143.7, 135.9, 135.4, 135.0, 133.7, 132.4, 131.2, 129.8, 129.7, 128.3, 128.2, 128.0, 127.9, 127.8, 126.8, 126.6, 125.4, 65.2, 48.5, 41.9, 30.8, 21.6, 19.9, 13.7 (*1 signal in the aromatic region and 2 signals in the aliphatic region are overlapping*). **HRMS (ESI)** *m/z*: [M+Na]<sup>+</sup> calcd for C<sub>34</sub>H<sub>33</sub>NO<sub>3</sub>SNa 558.2073; found 558.2080. **FTIR (cm<sup>-1</sup>)** 3058, 2958, 1662, 1462, 1349, 1159, 731.

### ***N*-(1-(2-Naphthoyl)-3-phenylbicyclo[2.1.1]hex-2-en-2-yl)-*N*-cyclopropyl-4-methylbenzenesulfonamide (3u)**

Following the general procedure, treatment of bicyclo[1.1.0]butan-1-yl(naphthalen-2-yl)methanone **1a** (42 mg, 0.2 mmol) and *N*-cyclopropyl-4-methyl-*N*-(phenylethynyl)benzenesulfonamide **2u** (125 mg, 0.4 mmol) with Sc(OTf)<sub>3</sub> (10 mg, 0.02 mmol) in CH<sub>2</sub>Cl<sub>2</sub> (2.0 mL) at 30 °C for 18 h followed by column chromatography (Pet. ether/EtOAc = 95/05) of the crude reaction mixture using silica gel afforded *N*-(1-(2-naphthoyl)-3-phenylbicyclo[2.1.1]hex-2-en-2-yl)-*N*-cyclopropyl-4-methylbenzenesulfonamide **3u** as white solid (61 mg, 59% yield).

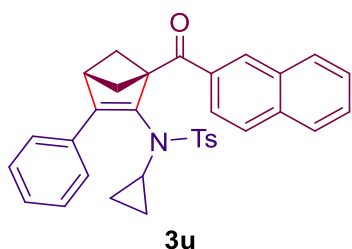

**R<sub>f</sub>** (Pet. ether/EtOAc = 95/05): 0.27; **<sup>1</sup>H NMR (400 MHz, CDCl<sub>3</sub>)** δ 8.50 (s, 1H), 8.04 (d, *J* = 8.6 Hz, 1H), 7.95 (d, *J* = 7.6 Hz, 1H), 7.90 – 7.86 (m, 2H), 7.58 (t, *J* = 7.5 Hz, 1H), 7.52 (d, *J* = 8.3 Hz, 3H), 7.17 – 7.11 (m, 5H), 6.94 (d, *J* = 6.7 Hz, 2H), 3.51 – 3.40 (m, 2H), 3.19 (s, 1H), 3.05 – 3.01 (m, 2H), 2.40 – 2.36 (s, 4H), 0.73 (bs, 1H), 0.59 (bs, 2H), 0.34 (bs, 1H). **<sup>13</sup>C NMR (100 MHz, CDCl<sub>3</sub>)** δ 198.4, 147.8, 147.1, 143.8, 135.5, 134.6, 134.3, 132.5, 131.5, 129.7, 129.4, 128.4, 128.4, 128.2, 128.1, 127.9, 127.6, 126.8, 126.7, 125.2, 65.2, 41.9, 31.5, 21.6, 9.7, 7.9 (*1 signal in the aromatic region and 1 signal in the aliphatic region are overlapping*). **HRMS (ESI)** *m/z*: [M+Na]<sup>+</sup> calcd for C<sub>33</sub>H<sub>29</sub>NO<sub>3</sub>SNa 542.1760; found 542.1763. **FTIR (cm<sup>-1</sup>)** 3055, 2951, 1665, 1489, 1345, 1157, 731.



***N*-(1-(2-Naphthoyl)-3-phenylbicyclo[2.1.1]hex-2-en-2-yl)-*N*-cyclohexyl-4-methylbenzene sulfonamide (3v)**

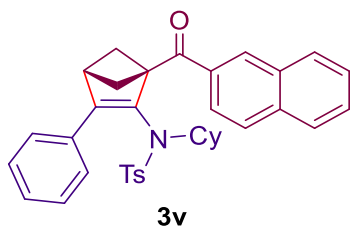

Following the general procedure, treatment of bicyclo[1.1.0]butan-1-yl(naphthalen-2-yl)methanone **1a** (42 mg, 0.2 mmol) and *N*-cyclohexyl-4-methyl-*N*-(phenylethynyl) benzenesulfonamide **2v** (141 mg, 0.4 mmol) with Sc(OTf)<sub>3</sub> (10 mg, 0.02 mmol) in CH<sub>2</sub>Cl<sub>2</sub> (2.0 mL) at 30 °C for 18 h followed

by column chromatography (Pet. ether/EtOAc = 90/10) of the crude reaction mixture using silica gel afforded *N*-(1-(2-naphthoyl)-3-phenylbicyclo[2.1.1]hex-2-en-2-yl)-*N*-cyclohexyl-4-methylbenzenesulfonamide **3v** as white solid (75 mg, 67% yield).

**R<sub>f</sub>** (Pet. ether/EtOAc = 85/15): 0.41; **<sup>1</sup>H NMR (400 MHz, CDCl<sub>3</sub>)** δ 8.67 (s, 1H), 8.08 (d, *J* = 6.9 Hz, 1H), 7.99 (d, *J* = 8.1 Hz, 1H), 7.86 (t, *J* = 9.2 Hz, 2H), 7.57 (t, *J* = 7.5 Hz, 1H), 7.51 (t, *J* = 7.4 Hz, 1H), 7.44 (d, *J* = 8.3 Hz, 2H), 7.33 – 7.31 (m, 2H), 7.23 – 7.21 (m, 3H), 6.92 (d, *J* = 8.3 Hz, 2H), 3.78 – 3.74 (m, 1H), 3.60 – 3.53 (m, 1H), 3.35 – 3.31 (m, 1H), 3.22 (s, 1H), 3.04 (s, 1H), 2.95 (s, 1H), 2.24 (s, 3H), 2.02 – 1.99 (m, 1H), 1.84 – 1.83 (m, 1H), 1.71 – 1.68 (m, 1H), 1.57 – 1.54 (m, 1H), 1.49 – 1.46 (m, 1H), 1.38 – 1.27 (m, 2H), 1.16 – 1.08 (m, 3H). **<sup>13</sup>C NMR (100 MHz, CDCl<sub>3</sub>)** δ 199.8, 153.1, 144.4, 142.9, 138.3, 135.4, 134.8, 134.1, 132.5, 132.0, 130.0, 129.2, 128.4, 128.3, 128.0, 127.9, 127.7, 127.6, 127.2, 126.6, 125.2, 67.8, 67.3, 65.5, 62.6, 42.3, 32.6, 26.2, 25.4, 21.5. **HRMS (ESI)** *m/z*: [M+Na]<sup>+</sup> calcd for C<sub>36</sub>H<sub>35</sub>NO<sub>3</sub>SNa 584.2230; found 584.2235. **FTIR (cm<sup>-1</sup>)** 2986, 2357, 1657, 1329, 1198, 1153.

***N*-(1-(2-Naphthoyl)-3-phenylbicyclo[2.1.1]hex-2-en-2-yl)-4-methyl-*N*-phenylbenzene sulfonamide (3w)**

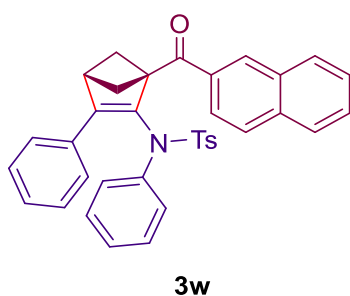

Following the general procedure, treatment of bicyclo[1.1.0]butan-1-yl(naphthalen-2-yl)methanone **1a** (42 mg, 0.2 mmol) and 4-methyl-*N*-phenyl-*N*-(phenylethynyl)benzenesulfonamide **2w** (139 mg, 0.4 mmol) with Sc(OTf)<sub>3</sub> (10 mg, 0.02 mmol) in CH<sub>2</sub>Cl<sub>2</sub> (2.0 mL) at 30 °C for 18 h followed by column chromatography (Pet. ether/EtOAc = 90/10) of the crude reaction

mixture using silica gel afforded *N*-(1-(2-naphthoyl)-3-phenylbicyclo[2.1.1]hex-2-en-2-yl)-4-methyl-*N*-phenylbenzenesulfonamide **3w** as white solid (74 mg, 67% yield).

**R<sub>f</sub>** (Pet. ether/EtOAc = 90/10): 0.28; **<sup>1</sup>H NMR (400 MHz, CDCl<sub>3</sub>)** δ 8.51 (s, 1H), 7.97 (dd, *J*<sub>1</sub> = 8.6 Hz, *J*<sub>2</sub> = 1.5 Hz, 1H), 7.90 (d, *J* = 8.1 Hz, 1H), 7.84 (t, *J* = 7.3 Hz, 2H), 7.60 – 7.56 (m, 1H), 7.53 – 7.49 (m, 1H), 7.41 – 7.34 (m, 6H), 7.20 – 7.18 (m, 3H), 7.05 (t, *J* = 7.8 Hz, 2H),

6.95 (t,  $J = 7.7$  Hz, 3H), 3.58 (s, 2H), 3.14 – 3.11 (m, 3H), 2.27 (s, 3H).  $^{13}\text{C}$  NMR (100 MHz,  $\text{CDCl}_3$ )  $\delta$  199.0, 150.0, 146.7, 143.6, 140.6, 136.8, 135.4, 134.4, 133.2, 132.5, 131.7, 130.0, 129.2, 128.8, 128.5, 128.3, 128.0, 128.0, 127.9, 127.7, 126.9, 126.5, 126.2, 125.1, 124.9, 65.0, 41.5, 21.6 (2 signals in the aliphatic region are overlapping). HRMS (ESI)  $m/z$ :  $[\text{M}+\text{Na}]^+$  calcd for  $\text{C}_{36}\text{H}_{29}\text{NO}_3\text{SNa}$  578.1760; found 578.1766. FTIR ( $\text{cm}^{-1}$ ) 2921, 2356, 1657, 1488, 1350, 1158.

***N*-(1-(2-Naphthoyl)-3-phenylbicyclo[2.1.1]hex-2-en-2-yl)-*N*-(4-methoxyphenyl)-4-methylbenzenesulfonamide (3x)**

Following the general procedure, treatment of bicyclo[1.1.0] butan-1-yl(naphthalen-2-yl)methanone **1a** (42 mg, 0.2 mmol) and *N*-(4-methoxyphenyl)-4-methyl-*N*-(phenylethynyl)benzene sulfonamide **2x** (152 mg, 0.4 mmol) with  $\text{Sc}(\text{OTf})_3$  (10 mg, 0.02 mmol) in  $\text{CH}_2\text{Cl}_2$  (2.0 mL) at 30 °C for 18 h followed by column chromatography (Pet. ether/EtOAc = 90/10) of the crude reaction mixture using silica gel afforded *N*-(1-(2-naphthoyl)-3-phenylbicyclo[2.1.1]hex-2-en-2-yl)-*N*-(4-methoxyphenyl)-4-methylbenzene sulfonamide **3x** as white solid (64 mg, 55% yield).

$R_f$  (Pet. ether/EtOAc = 90/10): 0.3;  $^1\text{H}$  NMR (400 MHz,  $\text{CDCl}_3$ )  $\delta$  8.46 (s, 1H), 7.96-7.94 (m, 1H), 7.90– 7.86 (m, 2H), 7.84 – 7.82 (m, 1H), 7.60 – 7.56 (m, 1H), 7.53-7.49 (m, 1H), 7.46-7.44 (m, 2H), 7.27-7.26 (m, 1H), 7.24-7.22 (m, 4H), 7.16-7.14 (m, 2H), 6.94 (d,  $J = 8.3$  Hz, 2H), 6.50-6.47 (m, 2H), 3.56 (s, 3H), 3.51 (s, 2H), 3.08-3.06 (m, 3H), 2.29 (s, 3H).  $^{13}\text{C}$  NMR (100 MHz,  $\text{CDCl}_3$ )  $\delta$  199.0, 158.2, 155.3, 149.4, 147.3, 143.4, 137.0, 135.4, 134.3, 133.6, 133.1, 132.5, 131.8, 130.1, 129.1, 128.5, 128.4, 128.1, 128.0, 127.9, 127.7, 127.0, 126.6, 124.8, 113.9, 67.8, 64.9, 55.2, 41.6, 27.1, 21.6. HRMS (ESI)  $m/z$ :  $[\text{M}+\text{Na}]^+$  calcd for  $\text{C}_{37}\text{H}_{31}\text{NO}_4\text{SNa}$  608.1866; found 608.1874. FTIR ( $\text{cm}^{-1}$ ) 2991, 2359, 1659, 1602, 1505, 1457.

***N*-(1-(2-Naphthoyl)-3-phenylbicyclo[2.1.1]hex-2-en-2-yl)-4-methyl-*N*-(*p*-tolyl)benzene sulfonamide (3y)**

Following the general procedure, treatment of bicyclo[1.1.0] butan-1-yl(naphthalen-2-yl)methanone **1a** (42 mg, 0.2 mmol) and 4-methyl-*N*-(phenylethynyl)-*N*-(*p*-tolyl)benzene sulfonamide **2y** (145 mg, 0.4 mmol) with  $\text{Sc}(\text{OTf})_3$  (10 mg, 0.02 mmol) in  $\text{CH}_2\text{Cl}_2$  (2.0 mL) at 30 °C for 18 h followed by column chromatography (Pet. ether/EtOAc = 90/10) of the crude reaction

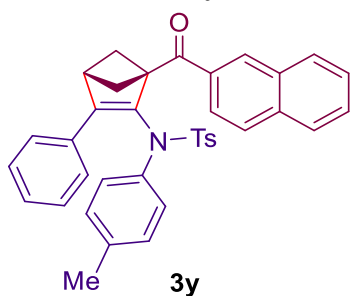

mixture using silica gel afforded *N*-(1-(2-naphthoyl)-3-phenylbicyclo[2.1.1]hex-2-en-2-yl)-4-methyl-*N*-(*p*-tolyl)benzenesulfonamide **3y** as white solid (61 mg, 54% yield).

**R<sub>f</sub>** (Pet. ether/EtOAc = 85/15): 0.55; **<sup>1</sup>H NMR (400 MHz, CDCl<sub>3</sub>)** δ 8.40 (s, 1H), 7.92 (dd, *J*<sub>1</sub> = 8.6 Hz, *J*<sub>2</sub> = 1.8 Hz, 1H), 7.85 – 7.79 (m, 3H), 7.56 (t, *J* = 8.3 Hz, 1H), 7.51 (d, *J* = 8.4 Hz, 1H), 7.44 – 7.42 (m, 2H), 7.32 (d, *J* = 8.4 Hz, 2H), 7.21 – 7.19 (m, 3H), 7.14 (d, *J* = 8.5 Hz, 2H), 6.95 (d, *J* = 8.3 Hz, 2H), 6.77 (d, *J* = 8.5 Hz, 2H), 3.54 (s, 2H), 3.10 (s, 3H), 2.28 (s, 3H), 2.06 (s, 3H). **<sup>13</sup>C NMR (100 MHz, CDCl<sub>3</sub>)** δ 198.9, 149.8, 146.8, 143.4, 137.9, 137.2, 136.3, 135.4, 134.3, 133.4, 132.4, 131.7, 130.0, 129.5, 129.1, 128.4, 128.4, 128.0, 128.0, 127.9, 127.7, 127.0, 126.4, 125.5, 124.8, 67.7, 65.1, 41.4, 21.6, 20.9 (*1 signal in the aliphatic region is overlapping*). **HRMS (ESI)** *m/z*: [M+Na]<sup>+</sup> calcd for C<sub>37</sub>H<sub>31</sub>NO<sub>3</sub>SNa 592.1917; found 592.1925. **FTIR (cm<sup>-1</sup>)** 2987, 2377, 1658, 1505, 1351, 1161.

#### ***N*-(1-(4-Methoxybenzoyl)-3-phenylbicyclo[2.1.1]hex-2-en-2-yl)-*N*,4-dimethylbenzene sulfonamide (**3z**)**

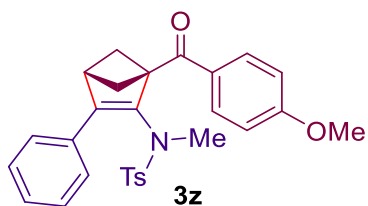

Following the general procedure, treatment of bicyclo[1.1.0]butan-1-yl(4-methoxyphenyl)methanone **1b** (37 mg, 0.2 mmol) and *N*,4-dimethyl-*N*-(phenylethynyl) benzene sulfonamide **2a** (114 mg, 0.4 mmol) with Sc(OTf)<sub>3</sub> (10 mg, 0.02 mmol) in CH<sub>2</sub>Cl<sub>2</sub> (2.0 mL) at 30 °C for 18 h followed by column

chromatography (Pet. ether/EtOAc = 90/10) of the crude reaction mixture using silica gel afforded *N*-(1-(4-methoxybenzoyl)-3-phenylbicyclo[2.1.1]hex-2-en-2-yl)-*N*,4-dimethyl benzenesulfonamide **3z** as white solid (63 mg, 66% yield).

**R<sub>f</sub>** (Pet. ether/EtOAc = 90/10): 0.2; **<sup>1</sup>H NMR (400 MHz, CDCl<sub>3</sub>)** δ 7.97 (d, *J* = 8.6 Hz, 2H), 7.56 (d, *J* = 7.5 Hz, 2H), 7.17 – 7.13 (m, 3H), 7.08 (t, *J* = 7.8 Hz, 2H), 6.93 (d, *J* = 8.2 Hz, 2H), 6.77 (d, *J* = 7.7 Hz, 2H), 3.87 (s, 3H), 3.29 (s, 2H), 3.06 (s, 2H), 3.01 (s, 1H), 2.97 (s, 3H), 2.37 (s, 3H). **<sup>13</sup>C NMR (100 MHz, CDCl<sub>3</sub>)** δ 196.7, 163.2, 148.1, 147.7, 143.7, 135.7, 133.2, 131.8, 130.2, 129.7, 128.3, 127.7, 127.6, 126.5, 113.5, 65.5, 55.5, 40.9, 38.0, 21.6 (*2 signals in the aliphatic region are overlapping*). **HRMS (ESI)** *m/z*: [M+Na]<sup>+</sup> calcd for C<sub>28</sub>H<sub>27</sub>NO<sub>4</sub>SNa 496.1553; found 496.1555. **FTIR (cm<sup>-1</sup>)** 2984, 1753, 1658, 1596, 1506, 1454.

#### ***N*,4-Dimethyl-*N*-(1-(4-methylbenzoyl)-3-phenylbicyclo[2.1.1]hex-2-en-2-yl)benzene sulfonamide (**3aa**)**

Following the general procedure, treatment of bicyclo[1.1.0]butan-1-yl(*p*-tolyl)methanone **1c** (35 mg, 0.2 mmol) and *N*,4-dimethyl-*N*-(phenylethynyl)benzenesulfonamide **2a** (114 mg, 0.4 mmol) with Sc(OTf)<sub>3</sub> (10 mg, 0.02 mmol) in CH<sub>2</sub>Cl<sub>2</sub> (2.0 mL) at 30 °C for 18 h followed by

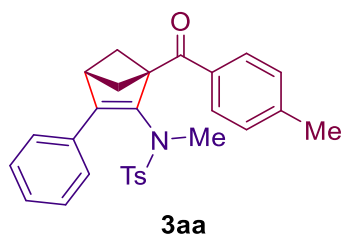

column chromatography (Pet. ether/EtOAc = 90/10) of the crude reaction mixture using silica gel afforded *N*,4-dimethyl-*N*-(1-(4-methylbenzoyl)-3-phenylbicyclo[2.1.1]hex-2-en-2-yl)benzenesulfonamide **3aa** as white solid (66 mg, 73% yield).

**R<sub>f</sub>** (Pet. ether/EtOAc = 85/15): 0.32; **<sup>1</sup>H NMR (400 MHz, CDCl<sub>3</sub>)** δ 7.88 (d, *J* = 7.9 Hz, 2H), 7.57 (d, *J* = 8.0 Hz, 2H), 7.25 (d, *J* = 7.9 Hz, 2H), 7.18 – 7.13 (m, 3H), 7.07 (t, *J* = 7.5 Hz, 2H), 6.74 (d, *J* = 8.2 Hz, 2H), 3.29 (s, 2H), 3.07 (s, 2H), 3.02 (s, 1H), 2.96 (s, 3H), 2.41 (s, 3H), 2.37 (s, 3H). **<sup>13</sup>C NMR (100 MHz, CDCl<sub>3</sub>)** δ 197.7, 148.0, 147.5, 143.7, 143.3, 135.7, 134.6, 133.2, 129.7, 129.6, 128.9, 128.2, 127.7, 127.5, 126.5, 65.6, 40.9, 37.9, 21.8, 21.6 (2 signals in the aliphatic region are overlapping). **HRMS (ESI)** *m/z*: [M+Na]<sup>+</sup> calcd for C<sub>28</sub>H<sub>27</sub>NO<sub>3</sub>SNa 480.1604; found 480.1610. **FTIR (cm<sup>-1</sup>)** 2988, 2356, 1664, 1446, 1345, 1158.

***N*-(1-(4-(*tert*-Butyl)benzoyl)-3-phenylbicyclo[2.1.1]hex-2-en-2-yl)-*N*,4-dimethylbenzenesulfonamide (**3ab**)**

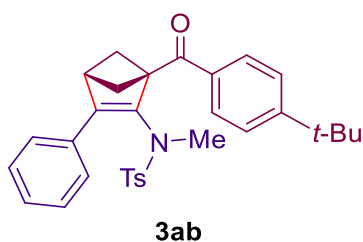

Following the general procedure, treatment of bicyclo[1.1.0]butan-1-yl(4-(*tert*-butyl)phenyl)methanone **1d** (43 mg, 0.2 mmol) and *N*,4-dimethyl-*N*-(phenylethynyl)benzenesulfonamide **2a** (114 mg, 0.4 mmol) with Sc(OTf)<sub>3</sub> (10 mg, 0.02 mmol) in CH<sub>2</sub>Cl<sub>2</sub> (2.0 mL) at 30 °C for 18 h followed by column chromatography (Pet. ether/EtOAc = 90/10) of the crude reaction mixture using silica gel afforded *N*-(1-(4-(*tert*-butyl)benzoyl)-3-phenylbicyclo[2.1.1]hex-2-en-2-yl)-*N*,4-dimethylbenzenesulfonamide **3ab** as white solid (71 mg, 71% yield).

**R<sub>f</sub>** (Pet. ether/EtOAc = 90/10): 0.24; **<sup>1</sup>H NMR (400 MHz, CDCl<sub>3</sub>)** δ 7.92 (d, *J* = 8.3 Hz, 2H), 7.56 (d, *J* = 8.0 Hz, 2H), 7.46 (d, *J* = 8.3 Hz, 2H), 7.17 – 7.08 (m, 5H), 6.82 (d, *J* = 7.4 Hz, 2H), 3.30 (s, 2H), 3.06 (s, 2H), 3.02 (m, 1H), 3.00 (m, 3H), 2.36 (s, 3H), 1.35 (s, 9H). **<sup>13</sup>C NMR (100 MHz, CDCl<sub>3</sub>)** δ 197.8, 156.2, 148.2, 147.6, 143.6, 135.8, 134.5, 133.1, 129.6, 129.5, 128.3, 127.7, 127.5, 126.4, 125.1, 65.4, 40.9, 38.0, 35.2, 31.2, 21.6 (2 signals in the aliphatic region are overlapping). **HRMS (ESI)** *m/z*: [M+Na]<sup>+</sup> calcd for C<sub>31</sub>H<sub>33</sub>NO<sub>3</sub>SNa 522.2073; found 522.2076. **FTIR (cm<sup>-1</sup>)** 2961, 2357, 1663, 1456, 1345, 1156.

***N*-(1-Benzoyl-3-phenylbicyclo[2.1.1]hex-2-en-2-yl)-*N*,4-dimethylbenzenesulfonamide (3ac)**

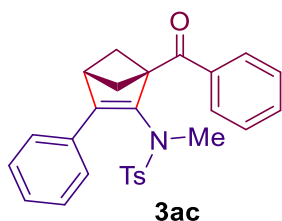

Following the general procedure, treatment of bicyclo[1.1.0]butan-1-yl(phenyl)methanone **1e** (32 mg, 0.2 mmol) and *N*,4-dimethyl-*N*-(phenylethynyl)benzenesulfonamide **2a** (114 mg, 0.4 mmol) with Sc(OTf)<sub>3</sub> (10 mg, 0.02 mmol) in CH<sub>2</sub>Cl<sub>2</sub> (2.0 mL) at 30 °C for 18 h followed by column chromatography (Pet. ether/EtOAc = 90/10) of the crude reaction mixture using silica gel afforded *N*-(1-benzoyl-3-phenylbicyclo[2.1.1]hex-2-en-2-yl)-*N*,4-dimethylbenzenesulfonamide **3ac** as white solid (58 mg, 65% yield).

**R<sub>f</sub>** (Pet. ether/EtOAc = 90/10): 0.22; **<sup>1</sup>H NMR (400 MHz, CDCl<sub>3</sub>)** δ 7.98 – 7.96 (m, 2H), 7.59 – 7.52 (m, 3H), 7.45 (t, *J* = 7.4 Hz, 2H), 7.18 – 7.13 (m, 3H), 7.07 (t, *J* = 7.4 Hz, 2H), 6.73 – 6.71 (m, 2H), 3.30 (s, 2H), 3.09 (s, 2H), 3.03 (s, 1H), 2.95 (s, 3H), 2.37 (s, 3H). **<sup>13</sup>C NMR (100 MHz, CDCl<sub>3</sub>)** δ 198.1, 147.9, 147.3, 143.7, 137.2, 135.6, 133.0, 132.6, 129.7, 129.4, 128.2, 128.1, 127.7, 127.4, 126.4, 65.6, 40.9, 37.8, 21.5 (2 signals in the aliphatic region are overlapping). **HRMS (ESI)** *m/z*: [M+Na]<sup>+</sup> calcd for C<sub>27</sub>H<sub>25</sub>NO<sub>3</sub>SNa 466.1447; found 466.1450. **FTIR (cm<sup>-1</sup>)** 2988, 2358, 1667, 1490, 1345, 1156.

***N*-(1-(4-Bromobenzoyl)-3-phenylbicyclo[2.1.1]hex-2-en-2-yl)-*N*,4-dimethylbenzenesulfonamide (3ad)**

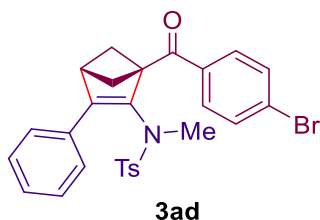

Following the general procedure, treatment of bicyclo[1.1.0]butan-1-yl(4-bromophenyl)methanone **1f** (47 mg, 0.2 mmol) and *N*,4-dimethyl-*N*-(phenylethynyl)benzenesulfonamide **2a** (114 mg, 0.4 mmol) with Sc(OTf)<sub>3</sub> (10 mg, 0.02 mmol) in CH<sub>2</sub>Cl<sub>2</sub> (2.0 mL) at 30 °C for 18 h followed by column chromatography (Pet.

ether/EtOAc = 90/10) of the crude reaction mixture using silica gel afforded *N*-(1-(4-bromobenzoyl)-3-phenylbicyclo[2.1.1]hex-2-en-2-yl)-*N*,4-dimethylbenzenesulfonamide **3ad** as white solid (78 mg, 75% yield).

**R<sub>f</sub>** (Pet. ether/EtOAc = 85/15): 0.32; **<sup>1</sup>H NMR (400 MHz, CDCl<sub>3</sub>)** δ 7.84 (d, *J* = 8.6 Hz, 2H), 7.59 (d, *J* = 8.1 Hz, 4H), 7.20 (d, *J* = 8.4 Hz, 2H), 7.13 (d, *J* = 8.5 Hz, 1H), 7.06 (t, *J* = 7.5 Hz, 2H), 6.66 (d, *J* = 7.1 Hz, 2H), 3.27 (s, 2H), 3.07 (s, 2H), 3.02 (s, 1H), 2.95 (s, 3H), 2.39 (s, 3H). **<sup>13</sup>C NMR (100 MHz, CDCl<sub>3</sub>)** δ 197.1, 147.8, 147.1, 143.9, 136.0, 135.4, 132.9, 131.5, 130.9, 129.8, 128.2, 127.8, 127.7, 127.5, 126.4, 65.4, 41.0, 37.9, 21.6 (2 signals in the aliphatic region are overlapping). **HRMS (ESI)** *m/z*: [M+Na]<sup>+</sup> calcd for C<sub>27</sub>H<sub>24</sub>BrNO<sub>3</sub>SNa 544.0552; found 544.0555. **FTIR (cm<sup>-1</sup>)** 2989, 2356, 1672, 1446, 1350, 1160.

***N*-(1-(4-Chlorobenzoyl)-3-phenylbicyclo[2.1.1]hex-2-en-2-yl)-*N*,4-dimethylbenzene sulfonamide (**3ae**)**

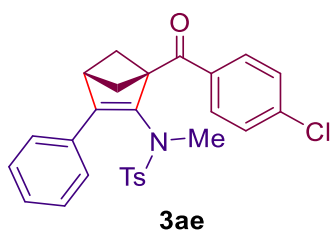

Following the general procedure, treatment of bicyclo[1.1.0]butan-1-yl(4-chlorophenyl)methanone **1g** (38 mg, 0.2 mmol) and *N*,4-dimethyl-*N*-(phenylethynyl)benzene sulfonamide **2a** (114 mg, 0.4 mmol) with Sc(OTf)<sub>3</sub> (10 mg, 0.02 mmol) in CH<sub>2</sub>Cl<sub>2</sub> (2.0 mL) at 30 °C for 18 h followed by column chromatography (Pet. ether/EtOAc = 90/10) of the crude reaction mixture using silica gel afforded *N*-(1-(4-chlorobenzoyl)-3-phenylbicyclo[2.1.1]hex-2-en-2-yl)-*N*,4-dimethylbenzene sulfonamide **3ae** as white solid (87 mg, 90% yield).

**R<sub>f</sub>** (Pet. ether/EtOAc = 90/10): 0.27; **<sup>1</sup>H NMR (400 MHz, CDCl<sub>3</sub>)** δ 7.91 (d, *J* = 8.5 Hz, 2H), 7.59 (d, *J* = 8.1 Hz, 2H), 7.42 (d, *J* = 8.4 Hz, 2H), 7.20 (d, *J* = 7.9 Hz, 2H), 7.14 (t, *J* = 7.3 Hz, 1H), 7.06 (t, *J* = 7.5 Hz, 2H), 6.66 (d, *J* = 7.8 Hz, 2H), 3.28 (s, 2H), 3.07 (s, 2H), 3.02 (s, 1H), 2.95 (s, 3H), 2.39 (s, 3H). **<sup>13</sup>C NMR (100 MHz, CDCl<sub>3</sub>)** δ 196.9, 147.8, 147.1, 143.9, 138.9, 135.6, 135.4, 133.0, 130.8, 129.8, 128.5, 128.2, 127.8, 127.5, 126.4, 65.4, 41.0, 37.9, 21.6 (2 signals in the aliphatic region are overlapping). **HRMS (ESI)** *m/z*: [M+Na]<sup>+</sup> calcd for C<sub>27</sub>H<sub>24</sub>ClNO<sub>3</sub>SNa 500.1058; found 500.1066. **FTIR (cm<sup>-1</sup>)** 2991, 2357, 1671, 1590, 1350, 1160.

***N*-(1-(4-Fluorobenzoyl)-3-phenylbicyclo[2.1.1]hex-2-en-2-yl)-*N*,4-dimethylbenzene sulfonamide (**3af**)**

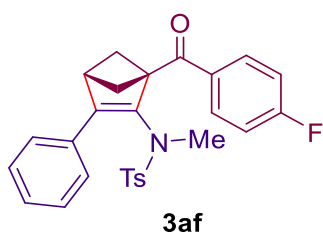

Following the general procedure, treatment of bicyclo[1.1.0]butan-1-yl(4-fluorophenyl)methanone **1h** (35 mg, 0.2 mmol) and *N*,4-dimethyl-*N*-(phenylethynyl)benzenesulfonamide **2a** (114 mg, 0.4 mmol) with Sc(OTf)<sub>3</sub> (10 mg, 0.02 mmol) in CH<sub>2</sub>Cl<sub>2</sub> (2.0 mL) at 30 °C for 18 h followed by column chromatography (Pet. ether/EtOAc = 90/10) of the crude reaction mixture using silica gel afforded *N*-(1-(4-fluorobenzoyl)-3-phenylbicyclo[2.1.1]hex-2-en-2-yl)-*N*,4-dimethylbenzenesulfonamide **3af** as white solid (74 mg, 80% yield).

**R<sub>f</sub>** (Pet. ether/EtOAc = 90/10): 0.21; **<sup>1</sup>H NMR (400 MHz, CDCl<sub>3</sub>)** δ 8.00 (dd, *J*<sub>1</sub> = 8.4 Hz, *J*<sub>2</sub> = 5.6 Hz, 2H), 7.59 (d, *J* = 8.1 Hz, 2H), 7.20 (d, *J* = 8.0 Hz, 2H), 7.13 (q, *J*<sub>1</sub> = 8.7 Hz, *J*<sub>2</sub> = 7.5 Hz, 3H), 7.05 (t, *J* = 7.5 Hz, 2H), 6.66 – 6.64 (m, 2H), 3.28 (s, 2H), 3.08 (s, 2H), 3.02 (s, 1H), 2.95 (s, 3H), 2.38 (s, 3H). **<sup>13</sup>C NMR (100 MHz, CDCl<sub>3</sub>)** δ 196.5, 165.4 (*J* = 254.8 Hz), 147.8, 147.1, 143.9, 135.3, 133.6 (*J* = 3.0 Hz), 132.9, 132.0 (*J* = 8.9 Hz), 129.8, 128.2, 127.8, 127.4, 126.4, 115.2 (*J* = 21.8 Hz), 65.4, 41.0, 37.8, 21.6 (2 signals in the aliphatic region are overlapping).

overlapping).  $^{19}\text{F}$  NMR (376 MHz,  $\text{CDCl}_3$ )  $\delta = -106.0$ . HRMS (ESI)  $m/z$ :  $[\text{M}+\text{Na}]^+$  calcd for  $\text{C}_{27}\text{H}_{24}\text{FNO}_3\text{SNa}$  484.1353; found 484.1360. FTIR ( $\text{cm}^{-1}$ ) 3020, 2359, 1667, 1598, 1349, 1156.

#### *N*-(1-(3-Methoxybenzoyl)-3-phenylbicyclo[2.1.1]hex-2-en-2-yl)-*N*,4-dimethyl benzene sulfonamide (**3ag**)

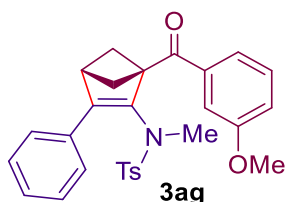

Following the general procedure, treatment of bicyclo[1.1.0]butan-1-yl(3-methoxyphenyl)methanone **1i** (37 mg, 0.2 mmol) and *N*,4-dimethyl-*N*-(phenylethynyl)benzene sulfonamide **2a** (114 mg, 0.4 mmol) with  $\text{Sc}(\text{OTf})_3$  (10 mg, 0.02 mmol) in  $\text{CH}_2\text{Cl}_2$  (2.0 mL) at 30 °C for 18 h followed by column chromatography (Pet. ether/EtOAc = 90/10) of the crude reaction mixture using silica gel afforded *N*-(1-(3-methoxybenzoyl)-3-phenylbicyclo[2.1.1]hex-2-en-2-yl)-*N*,4-dimethylbenzenesulfonamide **3ag** as white solid (62 mg, 65% yield).

$R_f$  (Pet. ether/EtOAc = 90/10): 0.2;  $^1\text{H}$  NMR (400 MHz,  $\text{CDCl}_3$ )  $\delta$  7.58-7.55 (m, 2H), 7.53-7.31 (m, 1H), 7.37 – 7.31 (m, 2H), 7.17 (d,  $J = 8.2$  Hz, 2H), 7.13 (d,  $J = 7.9$  Hz, 1H), 7.09-7.04 (m, 3H), 6.73 (d,  $J = 7.1$  Hz, 2H), 3.86 (s, 3H) 3.29 (s, 2H), 3.08 (s, 2H), 3.02 (s, 1H), 2.95 (s, 3H), 2.37 (s, 3H).  $^{13}\text{C}$  NMR (100 MHz,  $\text{CDCl}_3$ )  $\delta$  197.9, 159.6, 147.4, 143.7, 138.5, 135.7, 133.1, 129.7, 129.1, 128.5, 128.2, 127.8, 127.5, 126.4, 122.1, 119.1, 113.8, 65.6, 55.5, 40.9, 37.9, 21.6 (2 signals in the aliphatic region are overlapping). HRMS (ESI)  $m/z$ :  $[\text{M}+\text{Na}]^+$  calcd for  $\text{C}_{28}\text{H}_{27}\text{NO}_4\text{SNa}$  496.1553; found 496.1558. FTIR ( $\text{cm}^{-1}$ ) 2989, 2357, 1752, 1668, 1589, 1484.

#### *N*,4-Dimethyl-*N*-(1-(3-methylbenzoyl)-3-phenylbicyclo[2.1.1]hex-2-en-2-yl)benzene sulfonamide (**3ah**)

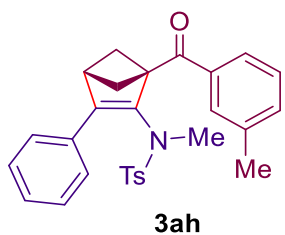

Following the general procedure, treatment of bicyclo[1.1.0]butan-1-yl(*m*-tolyl)methanone **1j** (35 mg, 0.2 mmol) and *N*,4-dimethyl-*N*-(phenylethynyl)benzenesulfonamide **2a** (114 mg, 0.4 mmol) with  $\text{Sc}(\text{OTf})_3$  (10 mg, 0.02 mmol) in  $\text{CH}_2\text{Cl}_2$  (2.0 mL) at 30 °C for 18 h followed by column chromatography (Pet. ether/EtOAc = 90/10) of the crude reaction mixture using silica gel afforded *N*,4-dimethyl-*N*-(1-(3-methylbenzoyl)-3-phenylbicyclo[2.1.1]hex-2-en-2-yl)benzenesulfonamide **3ah** as white solid (63 mg, 70% yield).

$R_f$  (Pet. ether/EtOAc = 90/10): 0.28;  $^1\text{H}$  NMR (400 MHz,  $\text{CDCl}_3$ )  $\delta$  7.77 (s, 2H), 7.57 (d,  $J = 8.3$  Hz, 2H), 7.34 (d,  $J = 7.1$  Hz, 2H), 7.18 – 7.15 (m, 3H), 7.07 (t,  $J = 6.2$  Hz, 2H), 6.74 (d,  $J$



= 8.6 Hz, 2H), 3.29 (s, 2H), 3.08 (s, 2H), 3.02 (s, 1H), 2.94 (s, 3H), 2.41 (s, 3H), 2.37 (s, 3H). <sup>13</sup>C NMR (100 MHz, CDCl<sub>3</sub>) δ 198.2, 148.0, 147.4, 143.7, 137.9, 137.2, 135.7, 133.4, 133.1, 130.0, 129.7, 128.3, 128.0, 127.8, 127.5, 126.7, 126.4, 65.7, 40.9, 37.9, 21.6, 21.6 (2 signals in the aliphatic region are overlapping). HRMS (ESI) m/z: [M+Na]<sup>+</sup> calcd for C<sub>28</sub>H<sub>27</sub>NO<sub>3</sub>SNa 480.1604; found 480.1609. FTIR (cm<sup>-1</sup>) 2941, 2357, 1668, 1448, 1347, 1159.

***N*-(1-(3-Fluorobenzoyl)-3-phenylbicyclo[2.1.1]hex-2-en-2-yl)-*N*,4-dimethylbenzenesulfonamide (3ai)**

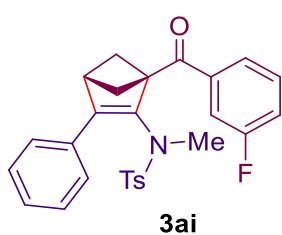

Following the general procedure, treatment of bicyclo[1.1.0]butan-1-yl(3-fluorophenyl)methanone **1k** (35 mg, 0.2 mmol) and *N*,4-dimethyl-*N*-(phenylethynyl)benzenesulfonamide **2a** (114 mg, 0.4 mmol) with Sc(OTf)<sub>3</sub> (10 mg, 0.02 mmol) in CH<sub>2</sub>Cl<sub>2</sub> (2.0 mL) at 30 °C for 18 h followed by column chromatography (Pet. ether/EtOAc =

90/10) of the crude reaction mixture using silica gel afforded *N*-(1-(3-fluorobenzoyl)-3-phenylbicyclo[2.1.1]hex-2-en-2-yl)-*N*,4-dimethylbenzenesulfonamide **3ai** as white solid (70 mg, 76% yield).

*R<sub>f</sub>* (Pet. ether/EtOAc = 90/10): 0.19; <sup>1</sup>H NMR (400 MHz, CDCl<sub>3</sub>) δ 7.76 (d, *J* = 7.7 Hz, 1H), 7.64 – 7.59 (m, 3H), 7.43 (q, *J* = 7.9 Hz, 1H), 7.26 – 7.20 (m, 3H), 7.14 (t, *J* = 7.3 Hz, 1H), 7.06 (t, *J* = 7.6 Hz, 2H), 6.65 (d, *J* = 7.8 Hz, 2H), 3.28 (s, 2H), 3.09 (s, 2H), 3.03 (s, 1H), 2.95 (s, 3H), 2.39 (s, 3H). <sup>13</sup>C NMR (100 MHz, CDCl<sub>3</sub>) δ 196.7 (*J* = 2.0 Hz), 162.6 (*J* = 246.5 Hz), 147.8, 147.0, 143.9, 139.3 (*J* = 6.3 Hz), 135.4, 132.9, 129.8, 129.7, 128.2, 127.9, 127.5, 126.4, 125.2 (*J* = 2.9 Hz), 119.5 (*J* = 21.4 Hz), 116.1 (*J* = 22.5 Hz), 65.5, 41.0, 37.9, 21.6 (2 signals in the aliphatic region are overlapping). <sup>19</sup>F NMR (376 MHz, CDCl<sub>3</sub>) δ = -112.5. HRMS (ESI) m/z: [M+Na]<sup>+</sup> calcd for C<sub>27</sub>H<sub>24</sub>FNO<sub>3</sub>SNa 484.1353; found 484.1363. FTIR (cm<sup>-1</sup>) 2986, 1674, 1589, 1486, 1347, 1159.

***N*-(1-(1-Naphthoyl)-3-phenylbicyclo[2.1.1]hex-2-en-2-yl)-*N*,4-dimethylbenzenesulfonamide (3aj)**

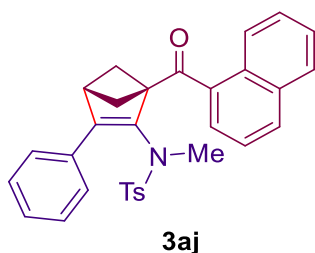

Following the general procedure, treatment of bicyclo[1.1.0]butan-1-yl(naphthalen-1-yl)methanone **1l** (42 mg, 0.2 mmol) and *N*,4-dimethyl-*N*-(phenylethynyl) benzenesulfonamide **2a** (114 mg, 0.4 mmol) with Sc(OTf)<sub>3</sub> (10 mg, 0.02 mmol) in CH<sub>2</sub>Cl<sub>2</sub> (2.0 mL) at 30 °C for 18 h followed by column chromatography (Pet. ether/EtOAc =

90/10) of the crude reaction mixture using silica gel afforded *N*-(1-(1-naphthoyl)-3-



phenylbicyclo[2.1.1]hex-2-en-2-yl)-*N*,4-dimethylbenzenesulfonamide **3aj** as white solid (51 mg, 51% yield).

**R<sub>f</sub>** (Pet. ether/EtOAc = 90/10): 0.3; **<sup>1</sup>H NMR (400 MHz, CDCl<sub>3</sub>)** δ 8.58 (d, *J* = 8.9 Hz, 1H), 8.04 (d, *J* = 7.1 Hz, 1H), 7.98 (d, *J* = 8.9 Hz, 1H), 7.88 (d, *J* = 8.5 Hz, 1H), 7.61 – 7.55 (m, 3H), 7.53–7.49 (m, 2H), 7.14–7.03 (m, 5H), 6.82 (d, *J* = 6.8 Hz, 2H), 3.30 (s, 2H), 3.09 (s, 2H), 3.02 (s, 4H), 2.32 (s, 3H). **<sup>13</sup>C NMR (100 MHz, CDCl<sub>3</sub>)** δ 200.8, 148.8, 147.0, 143.5, 136.5, 135.4, 134.1, 132.9, 132.2, 130.9, 129.6, 128.3, 128.3, 128.2, 127.7, 127.6, 127.3, 126.5, 126.4, 126.3, 124.0, 66.5, 40.2, 37.9, 21.5 (2 signals in the aliphatic region are overlapping). **HRMS (ESI) m/z: [M+Na]<sup>+</sup>** calcd for C<sub>31</sub>H<sub>27</sub>NO<sub>3</sub>SNa 516.1604; found 516.1607. **FTIR (cm<sup>-1</sup>)** 2924, 1664, 1461, 1352, 1215.

### ***N*-(1-(Benzo[*d*][1,3]dioxole-5-carbonyl)-3-phenylbicyclo[2.1.1]hex-2-en-2-yl)-*N*,4-dimethylbenzenesulfonamide (3ak)**

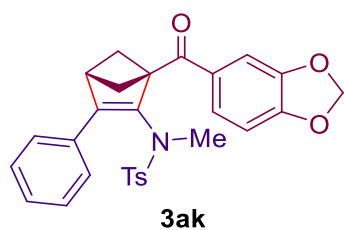

Following the general procedure, treatment of benzo[*d*][1,3]dioxol-5-yl(bicyclo[1.1.0]butan-1-yl)methanone **1m** (41 mg, 0.2 mmol) and *N*,4-dimethyl-*N*-(phenylethynyl)benzenesulfonamide **2a** (114 mg, 0.4 mmol) with Sc(OTf)<sub>3</sub> (10 mg, 0.02 mmol) in CH<sub>2</sub>Cl<sub>2</sub> (2.0 mL) at 30 °C for 18 h followed

by column chromatography (Pet. ether/EtOAc = 90/10) of the crude reaction mixture using silica gel afforded *N*-(1-(benzo[*d*][1,3]dioxole-5-carbonyl)-3-phenylbicyclo[2.1.1]hex-2-en-2-yl)-*N*,4-dimethyl benzenesulfonamide **3ak** as white solid (53 mg, 65% yield).

**R<sub>f</sub>** (Pet. ether/EtOAc = 90/10): 0.2; **<sup>1</sup>H NMR (400 MHz, CDCl<sub>3</sub>)** δ 7.58 (d, *J* = 7.5 Hz, 3H), 7.46 (s, 1H), 7.19 – 7.12 (m, 3H), 7.07 (t, *J* = 7.4 Hz, 2H), 6.84 (d, *J* = 7.9 Hz, 1H), 6.73 (d, *J* = 7.5 Hz, 2H), 6.03 (s, 2H), 3.27 (s, 2H), 3.06 (s, 2H), 3.00 (s, 1H), 2.97 (s, 3H), 2.38 (s, 3H). **<sup>13</sup>C NMR (100 MHz, CDCl<sub>3</sub>)** δ 196.0, 151.4, 148.0, 147.9, 147.5, 143.7, 135.7, 133.1, 131.8, 129.7, 128.3, 127.7, 127.5, 126.5, 126.0, 109.3, 107.6, 101.8, 65.4, 40.9, 38.0, 21.6 (2 signals in the aliphatic region are overlapping). **HRMS (ESI) m/z: [M+Na]<sup>+</sup>** calcd for C<sub>28</sub>H<sub>25</sub>NO<sub>5</sub>SNa 510.1346; found 510.1351. **FTIR (cm<sup>-1</sup>)** 2904, 2357, 1659, 1604, 1490, 1439.

### ***N*,4-Dimethyl-*N*-(3-phenyl-1-(thiophene-2-carbonyl)bicyclo[2.1.1]hex-2-en-2-yl)benzenesulfonamide (3al)**

Following the general procedure, treatment of bicyclo[1.1.0]butan-1-yl(thiophen-2-yl)methanone **1n** (33 mg, 0.2 mmol) and *N*,4-dimethyl-*N*-(phenylethynyl)benzenesulfonamide **2a** (114 mg, 0.4 mmol) with Sc(OTf)<sub>3</sub> (10 mg, 0.02 mmol) in CH<sub>2</sub>Cl<sub>2</sub> (2.0 mL) at 30 °C for 18 h followed by column chromatography (Pet. ether/EtOAc = 90/10) of the crude reaction

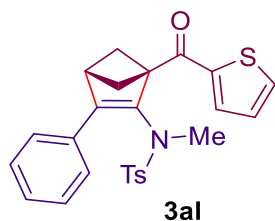

mixture using silica gel afforded *N*,4-dimethyl-*N*-(3-phenyl-1-(thiophene-2-carbonyl)bicyclo[2.1.1]hex-2-en-2-yl)benzenesulfonamide **3al** as white solid (69 mg, 77% yield).

$R_f$  (Pet. ether/EtOAc = 85/15): 0.33;  $^1\text{H NMR}$  (400 MHz,  $\text{CDCl}_3$ )  $\delta$  7.77 (d,  $J = 3.9$  Hz, 1H), 7.64 (d,  $J = 4.9$  Hz, 1H), 7.56 (d,  $J = 8.3$  Hz, 2H), 7.17 – 7.12 (m, 6H), 6.89 (d,  $J = 8.4$  Hz, 2H), 3.30 (s, 2H), 3.08 (s, 2H), 3.05 – 3.03 (m, 4H), 2.36 (s, 3H).  $^{13}\text{C NMR}$  (100 MHz,  $\text{CDCl}_3$ )  $\delta$  190.7, 148.5, 147.4, 143.8, 143.6, 135.8, 133.6, 133.4, 133.0, 129.6, 128.3, 128.0, 127.8, 127.6, 126.5, 64.9, 40.8, 38.0, 21.6 (2 signals in the aliphatic region are overlapping). **HRMS (ESI)**  $m/z$ :  $[\text{M}+\text{Na}]^+$  calcd for  $\text{C}_{25}\text{H}_{23}\text{NO}_3\text{S}_2\text{Na}$  472.1012; found 472.1016. **FTIR** ( $\text{cm}^{-1}$ ) 2988, 2356, 1746, 1450, 1350, 1157.

#### *N*-(1-(2-Naphthoyl)-3,4-diphenylbicyclo[2.1.1]hex-2-en-2-yl)-*N*,4-dimethylbenzenesulfonamide (**3am**)

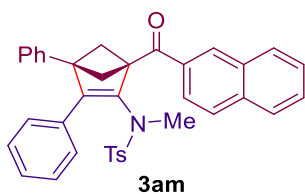

Following the general procedure, treatment of naphthalen-2-yl(3-phenylbicyclo[1.1.0]butan-1-yl)methanone **1o** (57 mg, 0.2 mmol) and *N*,4-dimethyl-*N*-(phenylethynyl)benzenesulfonamide **2a** (114 mg, 0.4 mmol) with  $\text{Sc}(\text{OTf})_3$  (10 mg, 0.02 mmol) in  $\text{CH}_2\text{Cl}_2$  (2.0 mL) at 30 °C for 18 h followed by column chromatography (Pet. ether/EtOAc = 90/10) of the crude reaction mixture using silica gel afforded *N*-(1-(2-naphthoyl)-3,4-diphenylbicyclo[2.1.1]hex-2-en-2-yl)-*N*,4-dimethylbenzenesulfonamide **3am** as white solid (40 mg, 35% yield).

$R_f$  (Pet. ether/EtOAc = 90/10): 0.35;  $^1\text{H NMR}$  (400 MHz,  $\text{CDCl}_3$ )  $\delta$  8.59 (s, 1H), 8.13 (dd,  $J = 8.6, 1.7$  Hz, 1H), 7.98 (d,  $J = 8.1$  Hz, 1H), 7.93 – 7.88 (m, 2H), 7.59 (t,  $J = 6.8$  Hz, 1H), 7.53 (t,  $J = 6.8$  Hz, 1H), 7.47 (d,  $J = 8.3$  Hz, 2H), 7.21 – 7.13 (m, 5H), 7.03 – 7.00 (m, 3H), 6.86 (t,  $J = 7.8$  Hz, 2H), 6.31 (d,  $J = 7.1$  Hz, 2H), 3.91 – 3.90 (m, 2H), 3.28 – 3.27 (m, 2H), 2.83 (s, 3H), 2.37 (s, 3H).  $^{13}\text{C NMR}$  (100 MHz,  $\text{CDCl}_3$ )  $\delta$  197.7, 149.6, 148.9, 143.7, 139.7, 135.6, 134.9, 134.3, 132.7, 132.5, 131.6, 129.8, 129.6, 128.4, 128.3, 128.2, 128.1, 128.0, 127.7, 127.6, 127.4, 127.0, 126.8, 126.7, 125.2, 60.5, 55.1, 38.4, 21.6 (2 signals in the aliphatic region are overlapping). **HRMS (ESI)**  $m/z$ :  $[\text{M}+\text{Na}]^+$  calcd for  $\text{C}_{37}\text{H}_{31}\text{NO}_3\text{SNa}$  592.1917; found 592.1922. **FTIR** ( $\text{cm}^{-1}$ ) 3026, 2952, 1731, 1441, 1341, 1249, 1157, 757.

***N*-(3,4-Diphenyl-1-(thiophene-2-carbonyl)bicyclo[2.1.1]hex-2-en-2-yl)-*N*,4-dimethylbenzenesulfonamide (**3an**)**

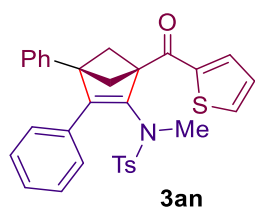

Following the general procedure, treatment of 3-phenylbicyclo[1.1.0]butan-1-yl(thiophen-2-yl)methanone **1p** (41 mg, 0.2 mmol) and *N*-((4-chlorophenyl)ethynyl)-*N*,4-dimethylbenzenesulfonamide **2a** (114 mg, 0.4 mmol) with Sc(OTf)<sub>3</sub> (10 mg, 0.02 mmol) in CH<sub>2</sub>Cl<sub>2</sub> (2.0 mL) at 30 °C for 18 h followed by column

chromatography (Pet. ether/EtOAc = 90/10) of the crude reaction mixture using silica gel afforded *N*-3,4-diphenyl-1-(thiophene-2-carbonyl)bicyclo[2.1.1]hex-2-en-2-yl)-*N*,4-dimethylbenzenesulfonamide **3an** as yellow sticky-solid (58 mg, 55% yield).

**R<sub>f</sub>** (Pet. ether/EtOAc = 90/10): 0.4; **<sup>1</sup>H NMR (400 MHz, CDCl<sub>3</sub>)** δ 7.89 – 7.88 (m, 1H), 7.67 (d, *J* = 5.0 Hz, H), 7.49 (d, *J* = 7.5 Hz, 2H), 7.20-7.15 (m, 6H), 7.00 (d, *J* = 8.0 Hz, 3H), 6.87 (t, *J* = 7.2 Hz, 2H), 6.37 (d, *J* = 8.1 Hz, 2H), 3.82 (s, 2H), 3.21-3.20 (m, 2H), 2.87 (s, 3H), 2.39-2.35 (m, 3H). **<sup>13</sup>C NMR (100 MHz, CDCl<sub>3</sub>)** δ 190.6, 149.9, 148.9, 143.7, 143.6, 139.6, 135.2, 133.7, 133.6, 132.6, 129.6, 128.3, 128.1, 128.1, 127.8, 127.7, 127.4, 127.0, 126.8, 59.9, 55.0, 38.5, 21.6 (2 signals in the aliphatic region are overlapping). **HRMS (ESI)** *m/z*: [M+Na]<sup>+</sup> calcd for C<sub>31</sub>H<sub>27</sub>NO<sub>3</sub>S<sub>2</sub>Na 548.1325; found 548.1326. **FTIR (cm<sup>-1</sup>)** 3059, 2940, 1697, 1447, 1352, 1161, 730.

## 7. Product Functionalization

### a) Hydrolysis of **3a**

Following the modified literature procedure,<sup>3</sup> to a Schlenk tube equipped with a magnetic stir bar was added **3a** (49.4 mg, 0.10 mmol, 1.0 equiv) and dry CH<sub>2</sub>Cl<sub>2</sub> (2 mL). Then, HCl (37 w%, 20 μL, 2.0 equiv) was added slowly to it. The reaction was then stirred at 25 °C for 4 h. Then aqueous saturated NaHCO<sub>3</sub> solution (1.0 mL) was added to quench the reaction. The organic layer was extracted with CH<sub>2</sub>Cl<sub>2</sub> (3 x 5 mL), washed with brine (8 mL), dried over Na<sub>2</sub>SO<sub>4</sub>, filtered and concentrated on rotavapor under reduced pressure. The residue was purified by column chromatography (petroleum ether/EtOAc = 85/15) to afford the corresponding product **8a** as white solid (28.3 mg, 90% yield).

<sup>3</sup> E.-i. Negishi and K. Akiyoshi, *Chem. Lett.*, 1987, **16**, 1007.

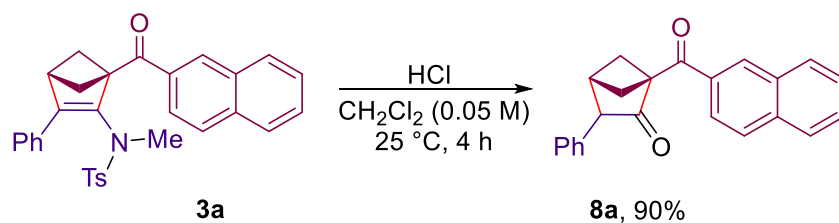

$R_f$  (Pet. ether/EtOAc = 85/15): 0.41;  $^1\text{H NMR}$  (400 MHz,  $\text{CDCl}_3$ )  $\delta$  8.25 (s, 1H), 7.91 – 7.85 (m, 4H), 7.59 (t,  $J = 7.5$  Hz, 1H), 7.53 (t,  $J = 7.4$  Hz, 1H), 7.47 – 7.39 (m, 4H), 7.32 (t,  $J = 7.3$  Hz, 1H), 3.91 (s, 1H), 3.19 (s, 1H), 2.78 – 2.75 (m, 1H), 2.67 – 2.63 (m, 1H), 2.59 (t,  $J = 8.6$  Hz, 1H), 2.46 (t,  $J = 8.6$  Hz, 1H).  $^{13}\text{C NMR}$  (100 MHz,  $\text{CDCl}_3$ )  $\delta$  207.6, 197.1, 136.13, 135.8, 133.1, 132.5, 131.2, 129.9, 128.9, 128.8, 128.6, 127.9, 127.7, 127.3, 126.9, 124.4, 72.9, 55.6, 44.1, 42.6, 35.7. **HRMS (ESI)**  $m/z$ :  $[\text{M}+\text{Na}]^+$  calcd for  $\text{C}_{23}\text{H}_{18}\text{NaO}_2$  349.1199; found 349.1206. **FTIR** ( $\text{cm}^{-1}$ ) 2994, 1753, 1661, 1318, 1232, 1180.

#### b) Bromination of 3a

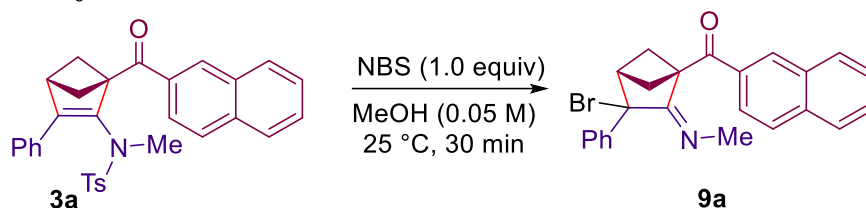

According to the modified literature procedure,<sup>4</sup> to a Schlenk tube containing **3a** (49.4 mg, 0.10 mmol, 1.0 equiv), MeOH (2.0 mL) was added, followed by the addition of NBS (18 mg, 0.10 mmol, 1.0 equiv) to it. The reaction was stirred at 25 °C for 30 min. After reaction completion (monitored by TLC), MeOH is removed by rotavapor. The crude reaction mixture was extracted with ethyl acetate (3 x 5 mL), washed with brine (8 mL), dried over  $\text{Na}_2\text{SO}_4$ , filtered and concentrated on rotavapor under reduced pressure. The residue was purified by column chromatography (petroleum ether/EtOAc = 90/10) to afford the corresponding product **9a** as white solid (29 mg, 70% yield).

$R_f$  (Pet. ether/EtOAc = 85/15): 0.41;  $^1\text{H NMR}$  (400 MHz,  $\text{CDCl}_3$ )  $\delta$  8.43 (s, 1H), 8.00 (dd,  $J = 8.5, 1.8$  Hz, 1H), 7.95 (d,  $J = 8.2$  Hz, 1H), 7.90 (d,  $J = 8.5$  Hz, 2H), 7.60 – 7.53 (m, 4H), 7.43 (t,  $J = 7.4$  Hz, 2H), 7.38 – 7.34 (m, 1H), 3.39 (s, 3H), 3.13 (t,  $J = 3.2$  Hz, 1H), 2.94 (dd,  $J = 9.9, 7.4$  Hz, 1H), 2.63 (dd,  $J = 7.4, 3.2$  Hz, 1H), 2.28 (dd,  $J = 7.9, 3.4$  Hz, 1H), 2.18 – 2.14 (m, 1H).  $^{13}\text{C NMR}$  (100 MHz,  $\text{CDCl}_3$ )  $\delta$  198.1, 170.4, 139.8, 135.8, 133.3, 132.6, 131.7, 129.9, 128.7, 128.4, 128.1, 127.9, 126.8, 124.9, 68.7, 67.1, 49.9, 46.6, 42.2, 40.3. **HRMS (ESI)**  $m/z$ :

<sup>4</sup> V. M. Lyubchanskaya, T. I. Mukhanova, L. M. Alekseeva and V. G. Granik, *Pharm Chem J.*, 1995, **29**, 780.

[M+H]<sup>+</sup> calcd for C<sub>24</sub>H<sub>21</sub>BrNO 418.0801; found 418.0804. **FTIR** (cm<sup>-1</sup>) 2893, 1669, 1360, 1180, 992, 764.

c) *Hydrazone formation from 3a*

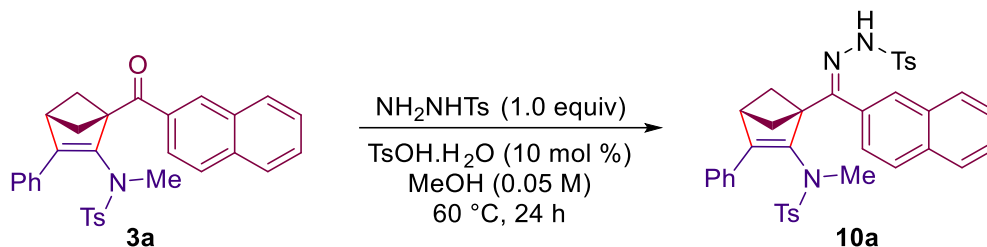

Following the literature procedure,<sup>5</sup> to a Schlenk tube equipped with a magnetic stir bar was added with **3a** (49.4 mg, 0.10 mmol, 1.0 equiv), *p*-toluenesulfonyl hydrazide (19 mg, 0.1 mmol) and methanol (2 ml). To this, *p*-toluenesulfonic acid monohydrate (10 mol%) was added and the reaction mixture was stirred at 60 °C for 24 h and the reaction was monitored by TLC. After reaction completion, the crude reaction mixture concentrated on rotavapor under reduced pressure. The residue was purified by column chromatography (petroleum ether/EtOAc = 85/15) to afford the corresponding product **10a** as white solid (45 mg, 68% yield).

**R<sub>f</sub>** (Pet. ether/EtOAc = 80/20): 0.21; **<sup>1</sup>H NMR** (400 MHz, CDCl<sub>3</sub>) δ 7.90 (d, *J* = 8.5 Hz, 1H), 7.87 – 7.79 (m, 4H), 7.59 – 7.50 (m, 6H), 7.35 (d, *J* = 8.4 Hz, 2H), 7.20 (dd, *J* = 8.4, 1.7 Hz, 1H), 7.08 – 7.05 (m, 3H), 7.03 – 7.00 (m, 2H), 6.88 – 6.85 (m, 2H), 3.09 – 2.97 (m, 3H), 2.82 – 2.80 (m, 2H), 2.57 (s, 3H), 2.44 (s, 3H), 2.33 (s, 3H). **<sup>13</sup>C NMR** (100 MHz, CDCl<sub>3</sub>) δ 155.0, 150.5, 147.1, 144.0, 143.2, 137.3, 136.0, 133.4, 133.2, 132.9, 129.6, 129.5, 128.6, 128.2, 128.1, 128.0, 127.5, 127.5, 127.3, 127.1, 126.1, 124.6, 62.0, 39.9, 37.9, 21.8, 21.5. **HRMS** (ESI) *m/z*: [M+Na]<sup>+</sup> calcd for C<sub>38</sub>H<sub>35</sub>N<sub>3</sub>O<sub>4</sub>S<sub>2</sub>Na 684.1961; found 684.1970. **FTIR** (cm<sup>-1</sup>) 3056, 2868, 2255, 1598, 1444, 1344, 1180, 726.

<sup>5</sup> Z. Huang, Y. Yang, Q. Xiao, Y. Zhang and J. Wang, *Eur. J. Org. Chem.*, 2012, 6586.

## 8. $^1\text{H}$ and $^{13}\text{C}$ NMR Spectra of 2-Amino Bicyclo[2.1.1]hexenes

### *N*-(1-(2-Naphthoyl)-3-phenylbicyclo[2.1.1]hex-2-en-2-yl)-*N*,4-dimethylbenzenesulfonamide (**3a**)

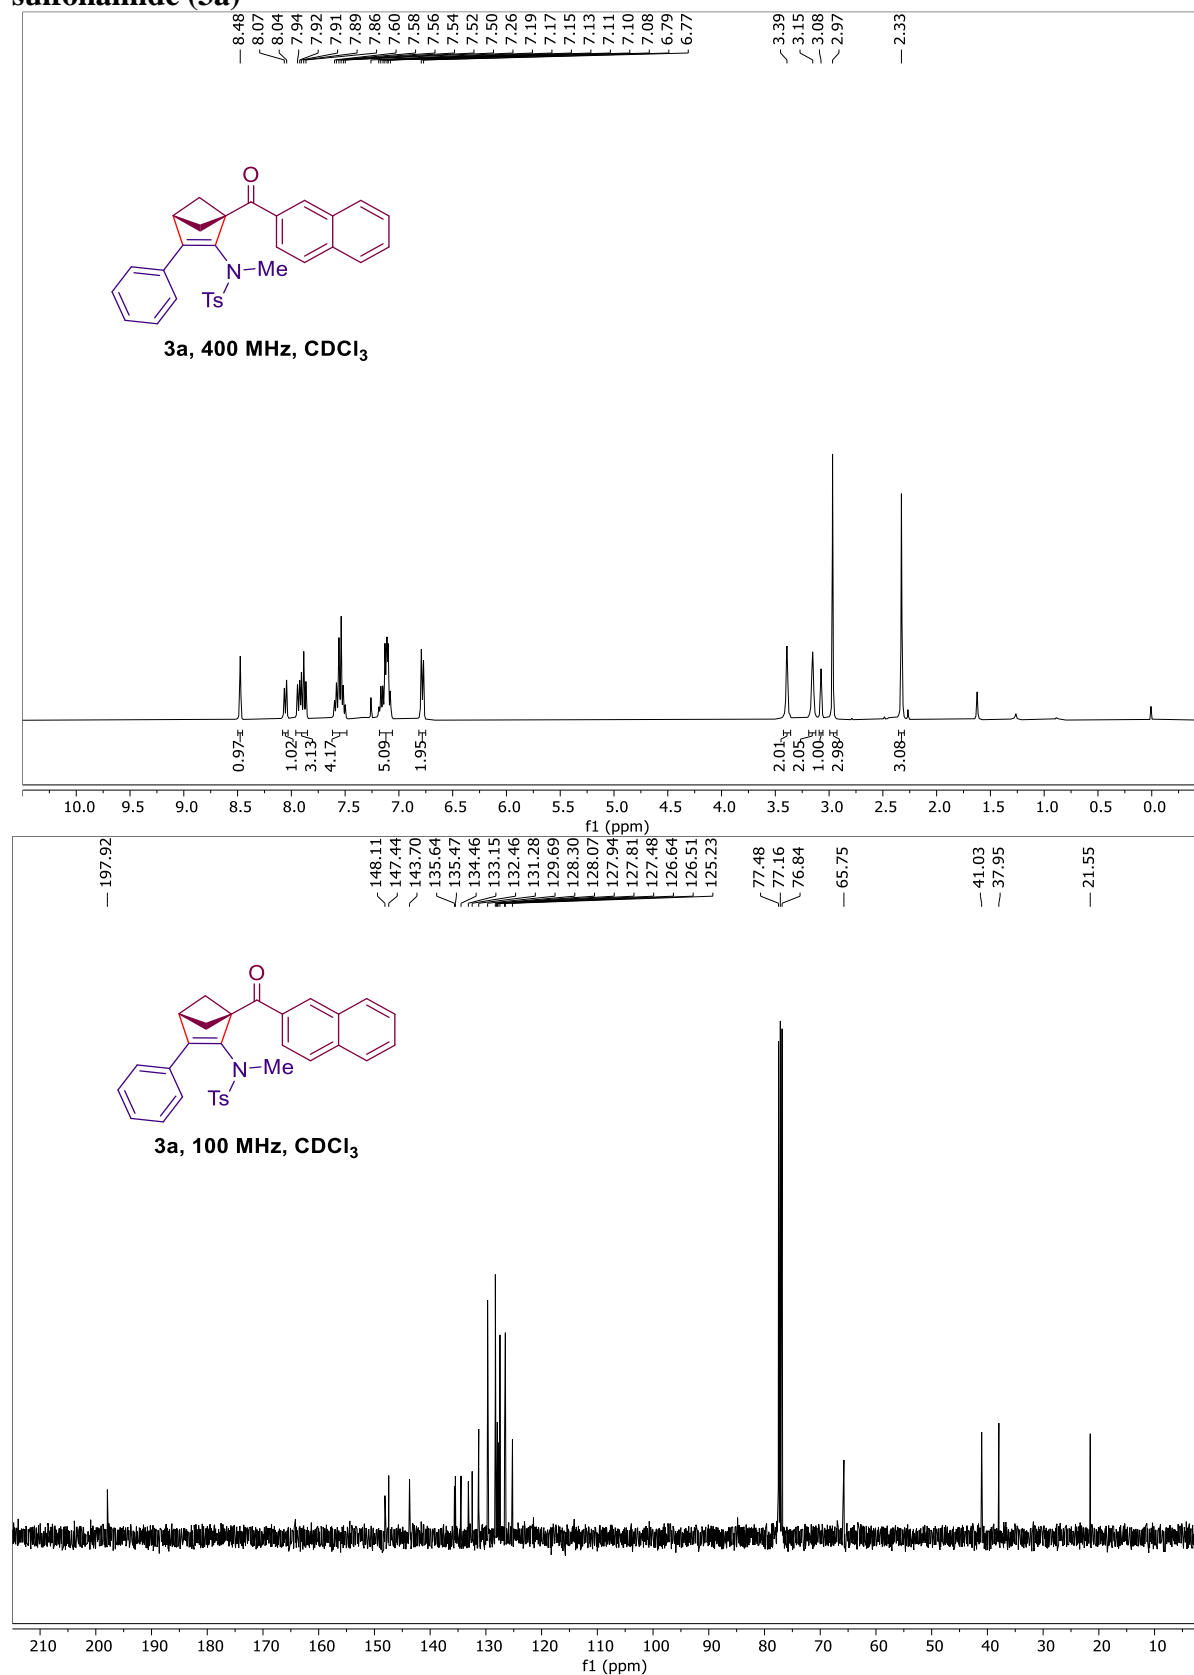

***N*-(1-(2-Naphthoyl)-3-(4-methoxyphenyl)bicyclo[2.1.1]hex-2-en-2-yl)-*N*,4-dimethyl benzenesulfonamide (3b)**

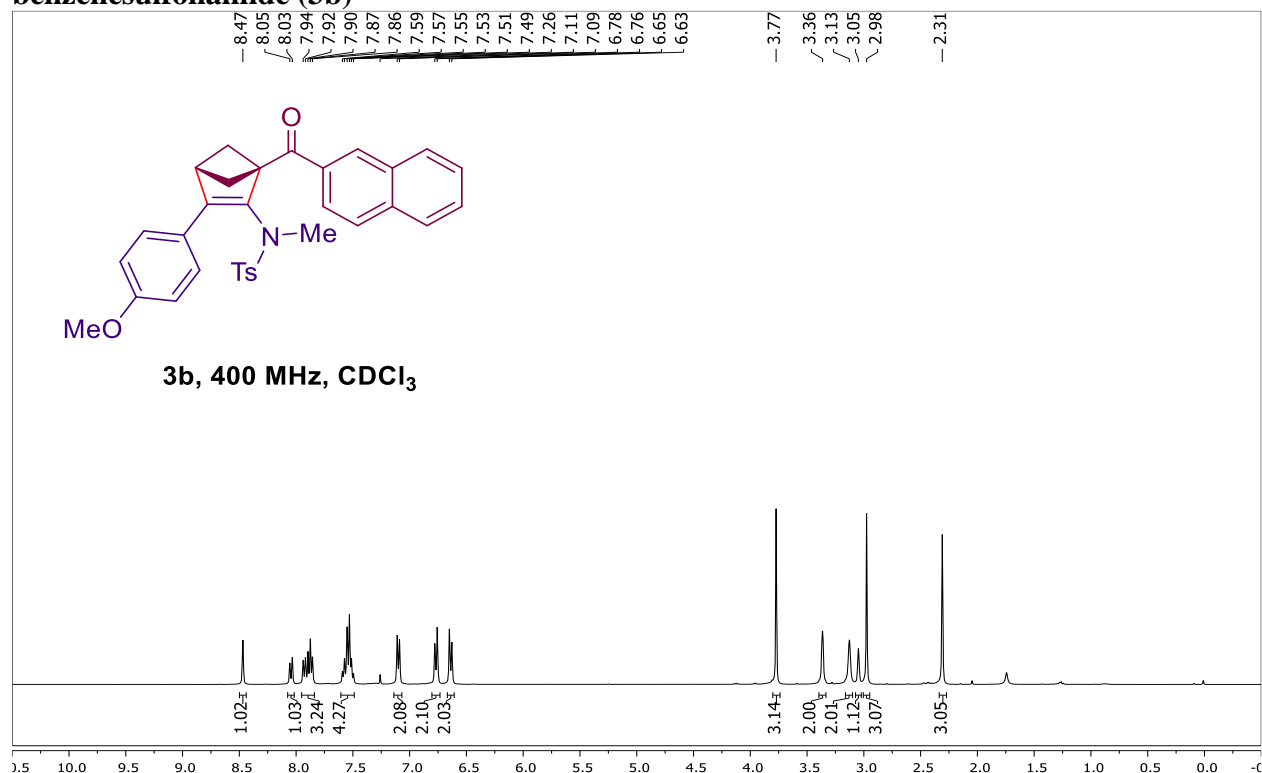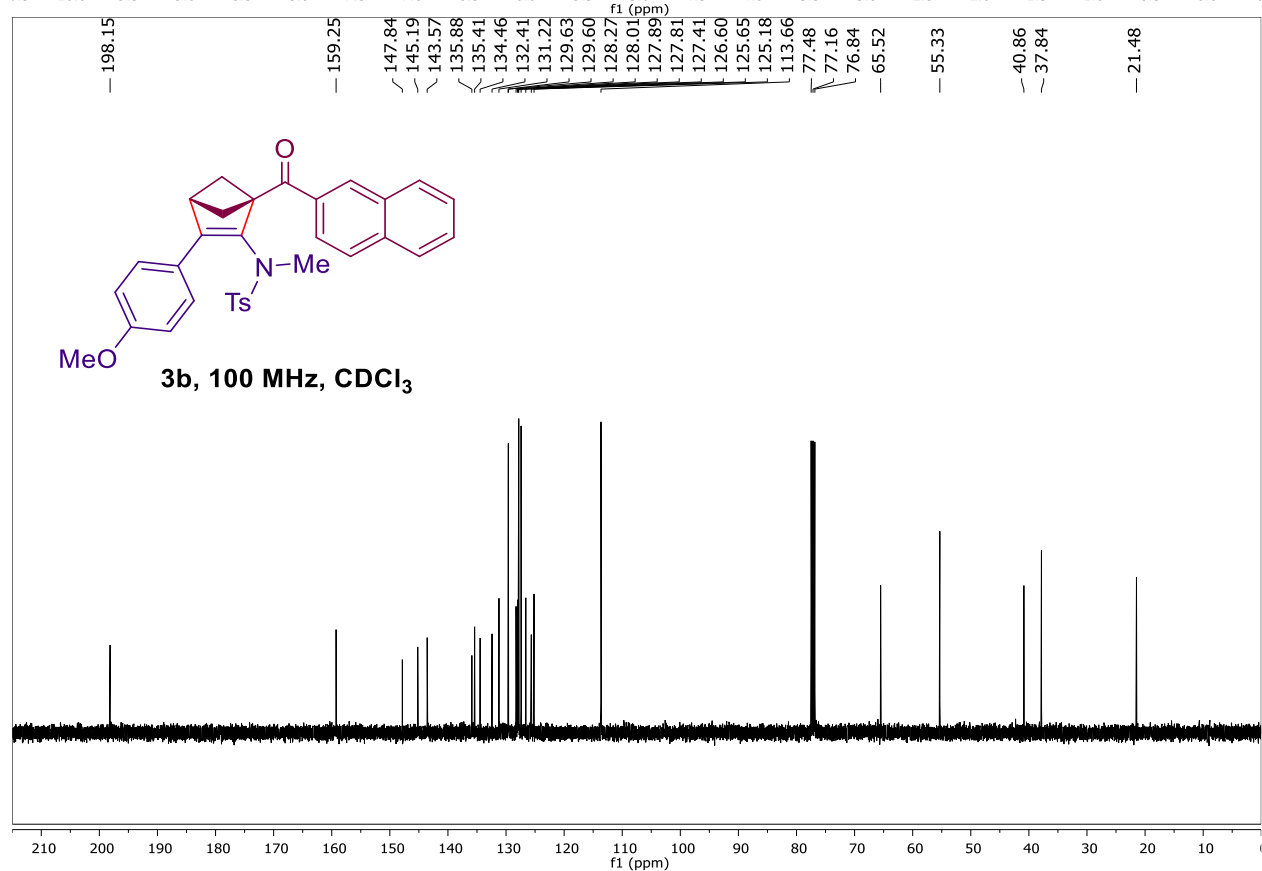

***N*-(1-(2-Naphthoyl)-3-(*p*-tolyl)bicyclo[2.1.1]hex-2-en-2-yl)-*N*,4-dimethylbenzene sulfonamide (**3c**)**

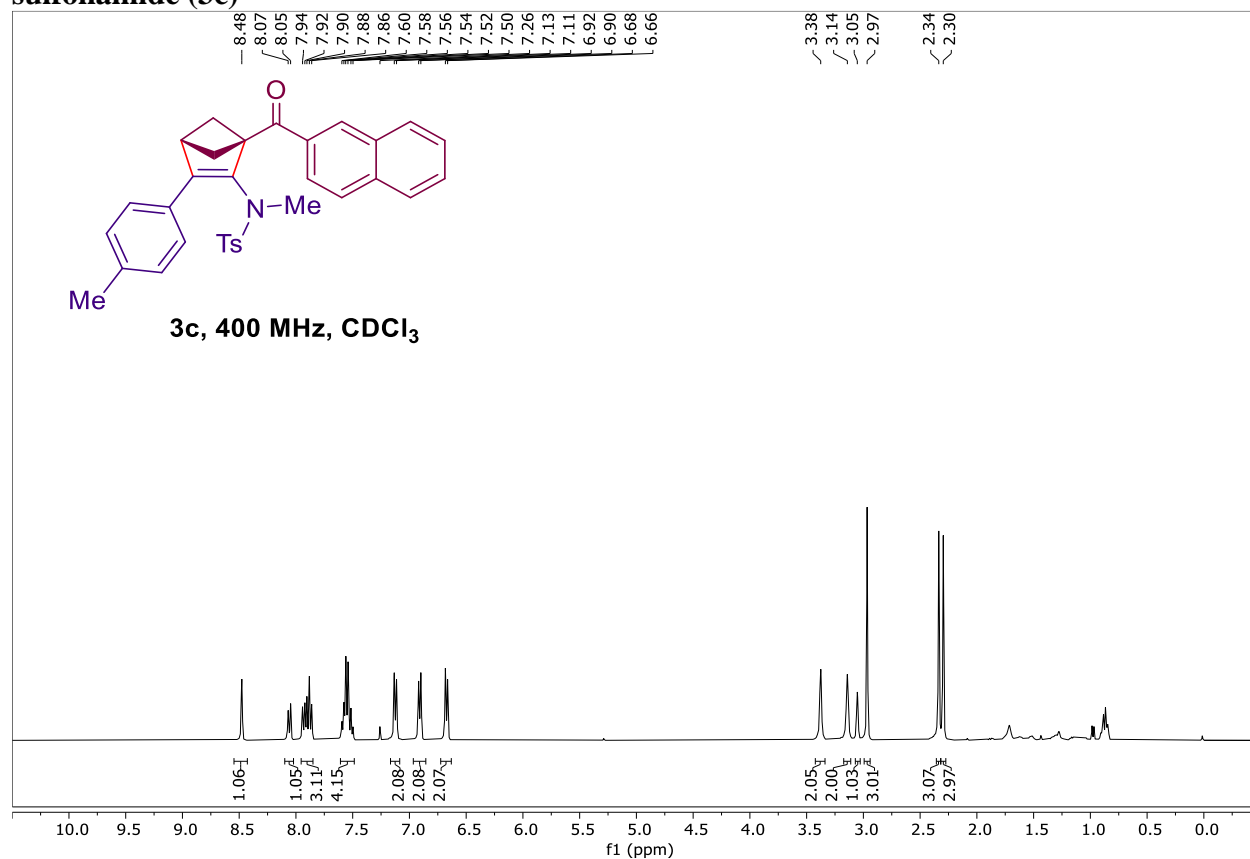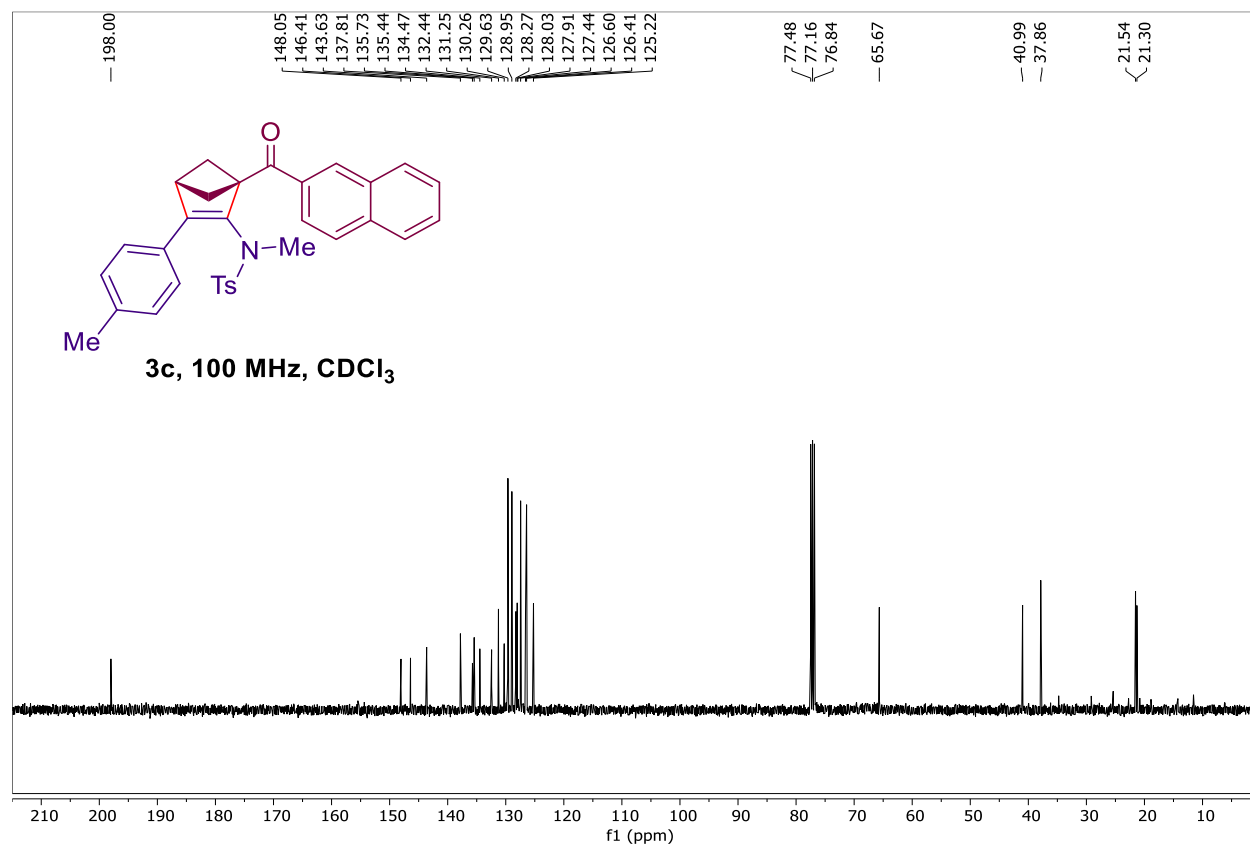



***N*-(1-(2-Naphthoyl)-3-(4-(*tert*-butyl)phenyl)bicyclo[2.1.1]hex-2-en-2-yl)-*N*,4-dimethyl benzenesulfonamide (3d)**

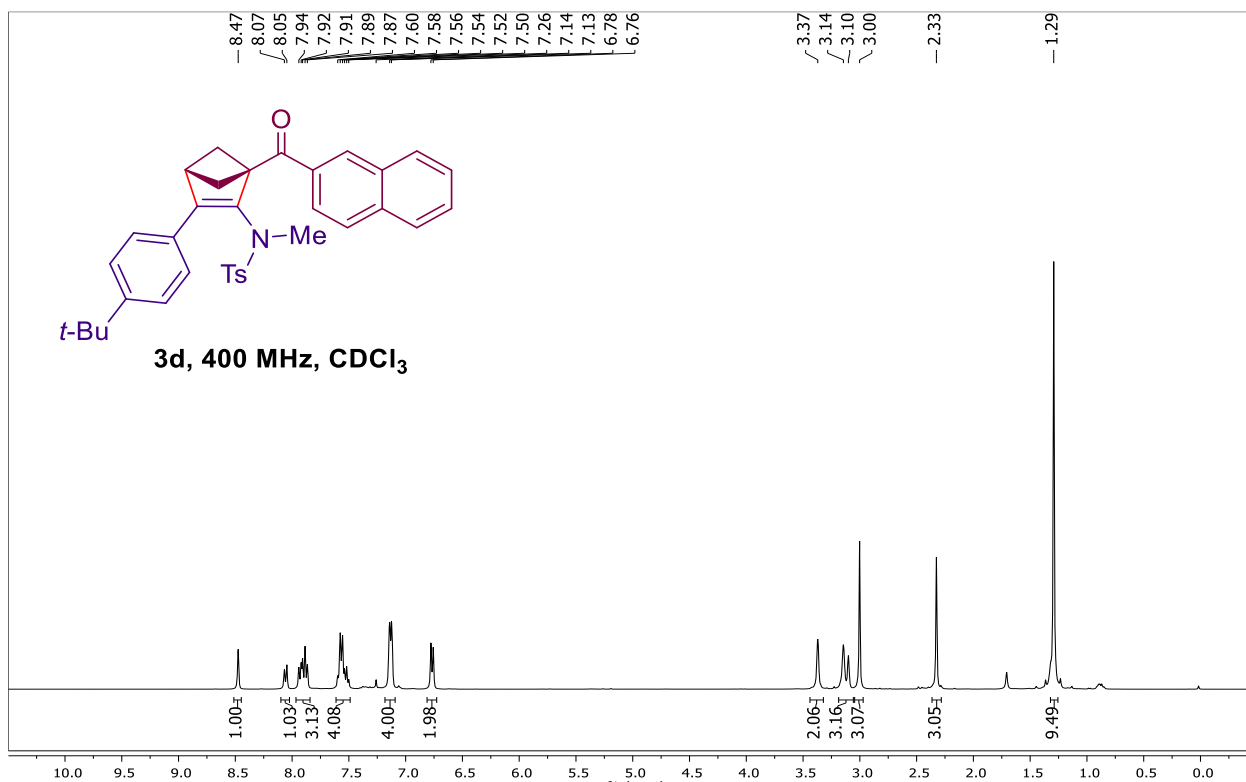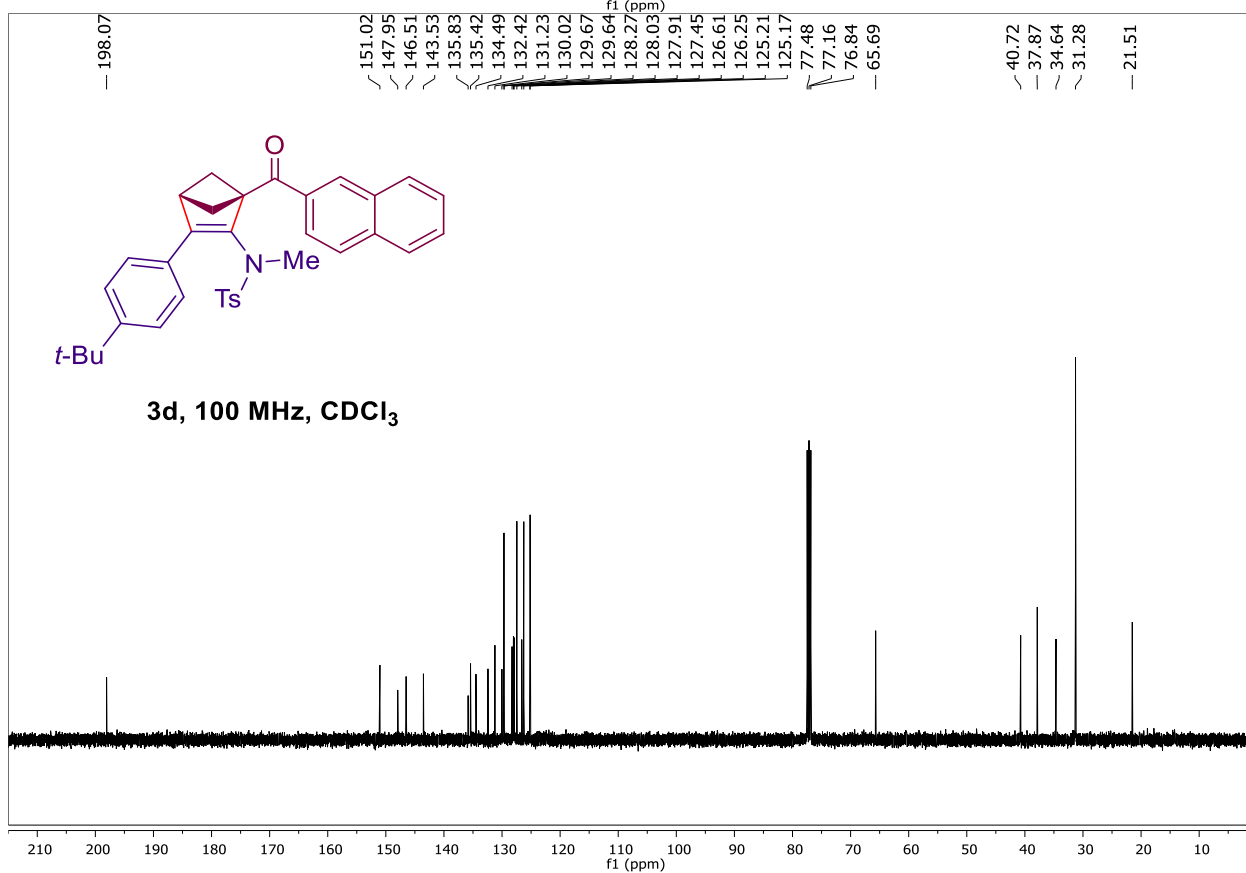

***N*-(1-(2-naphthoyl)-3-(4-bromophenyl)bicyclo[2.1.1]hex-2-en-2-yl)-*N*,4-dimethylbenzene sulfonamide (3e)**

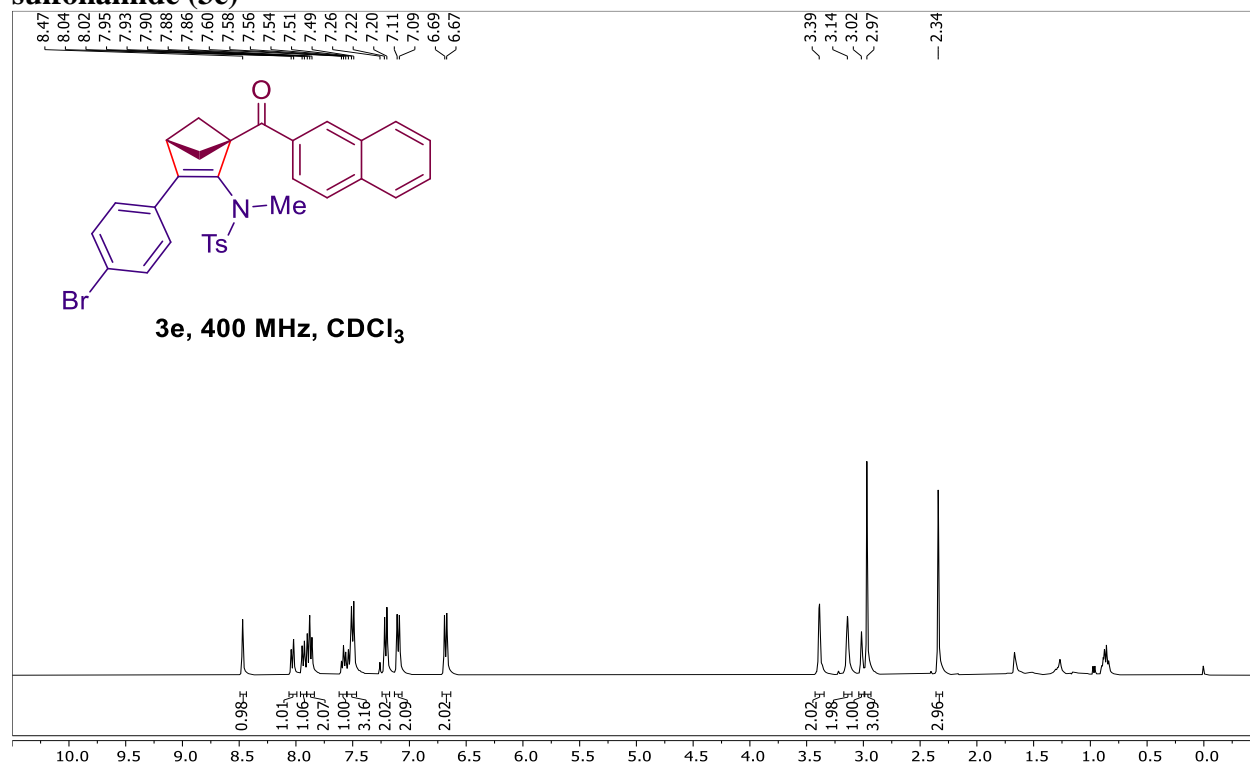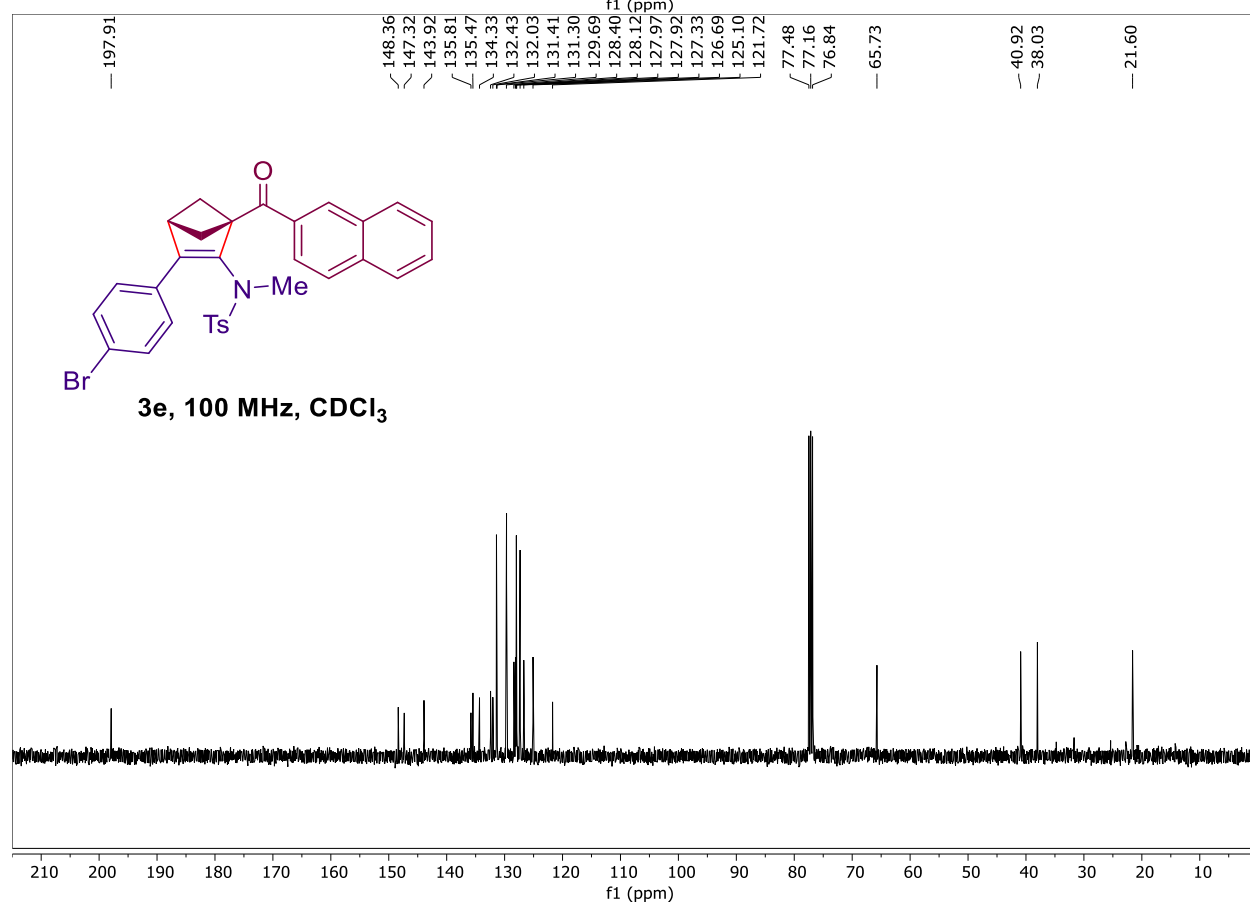

***N*-(1-(2-Naphthoyl)-3-(4-chlorophenyl)bicyclo[2.1.1]hex-2-en-2-yl)-*N*,4-dimethylbenzenesulfonamide (3f)**

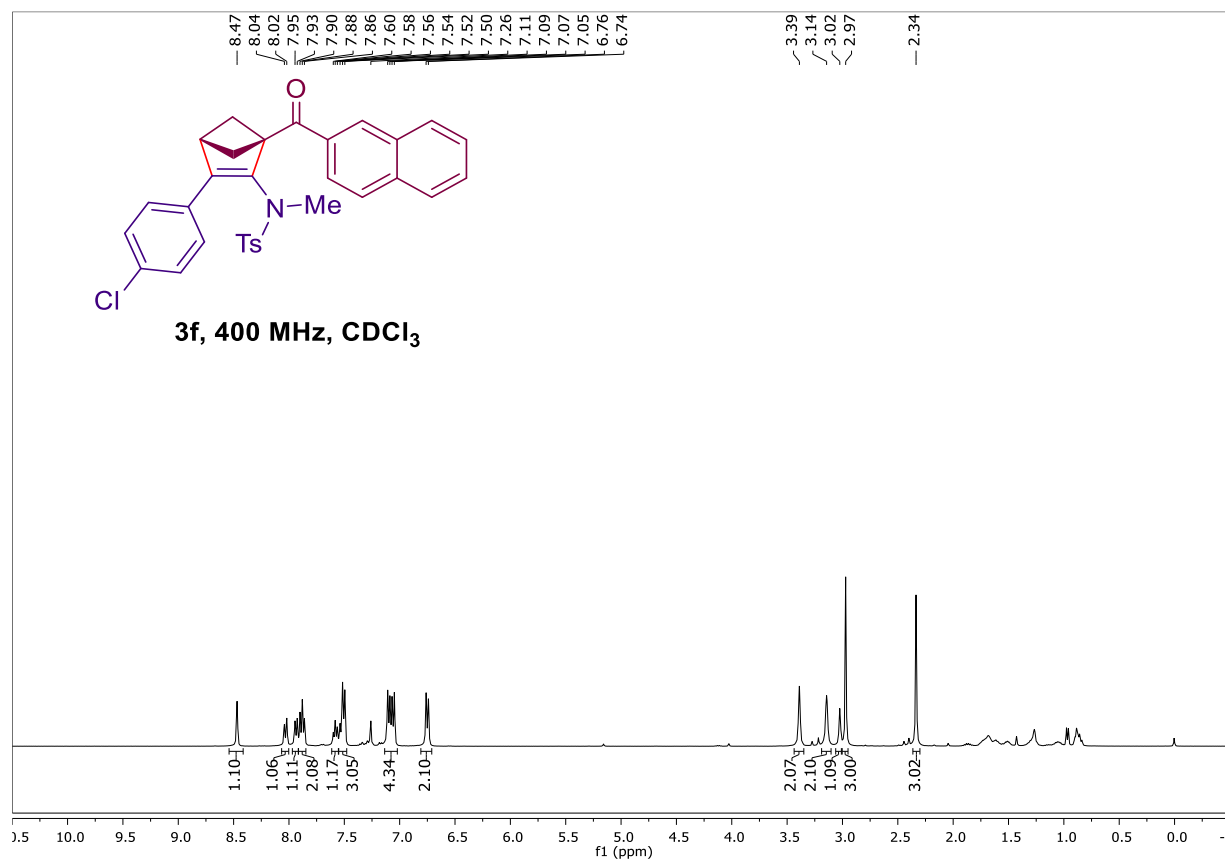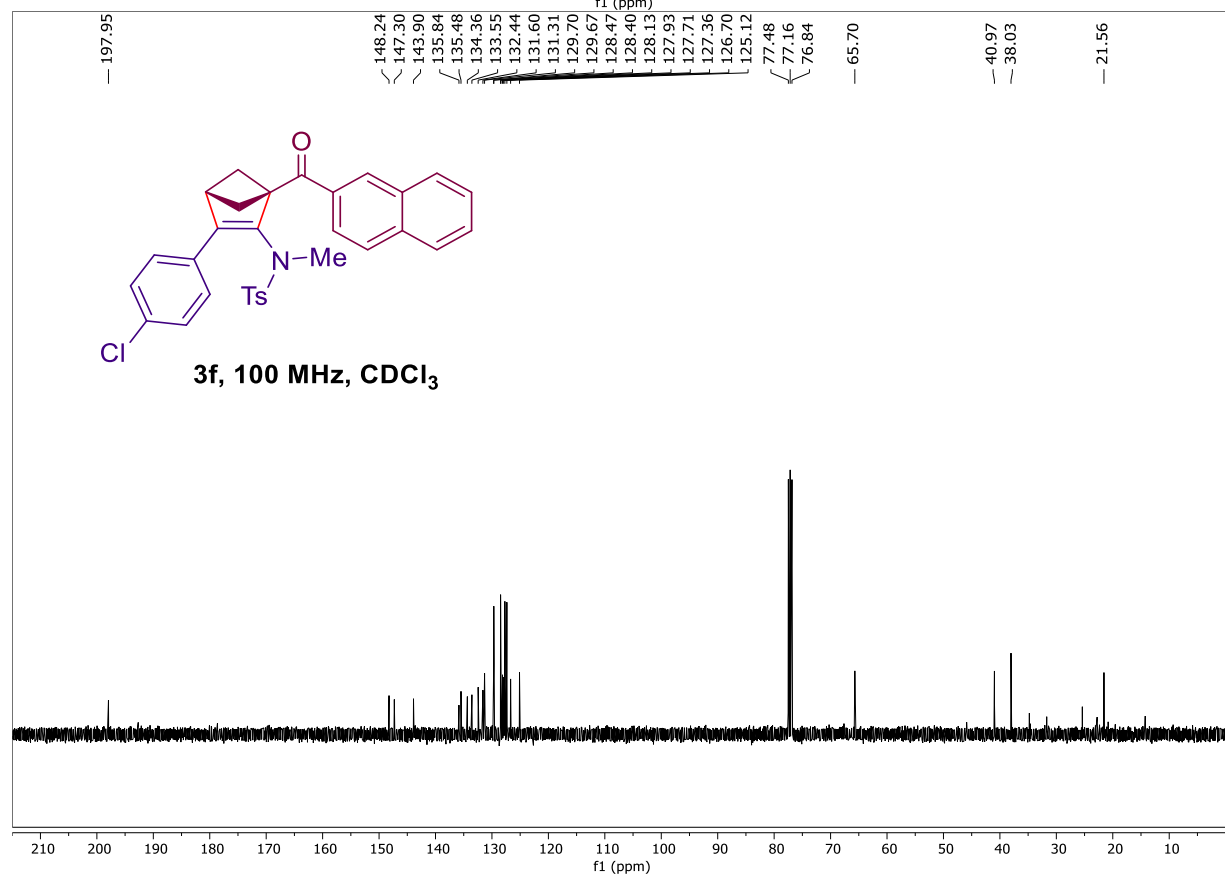

***N*-(1-(2-Naphthoyl)-3-(3-methoxyphenyl)bicyclo[2.1.1]hex-2-en-2-yl)-*N*,4-dimethylbenzenesulfonamide (3g)**

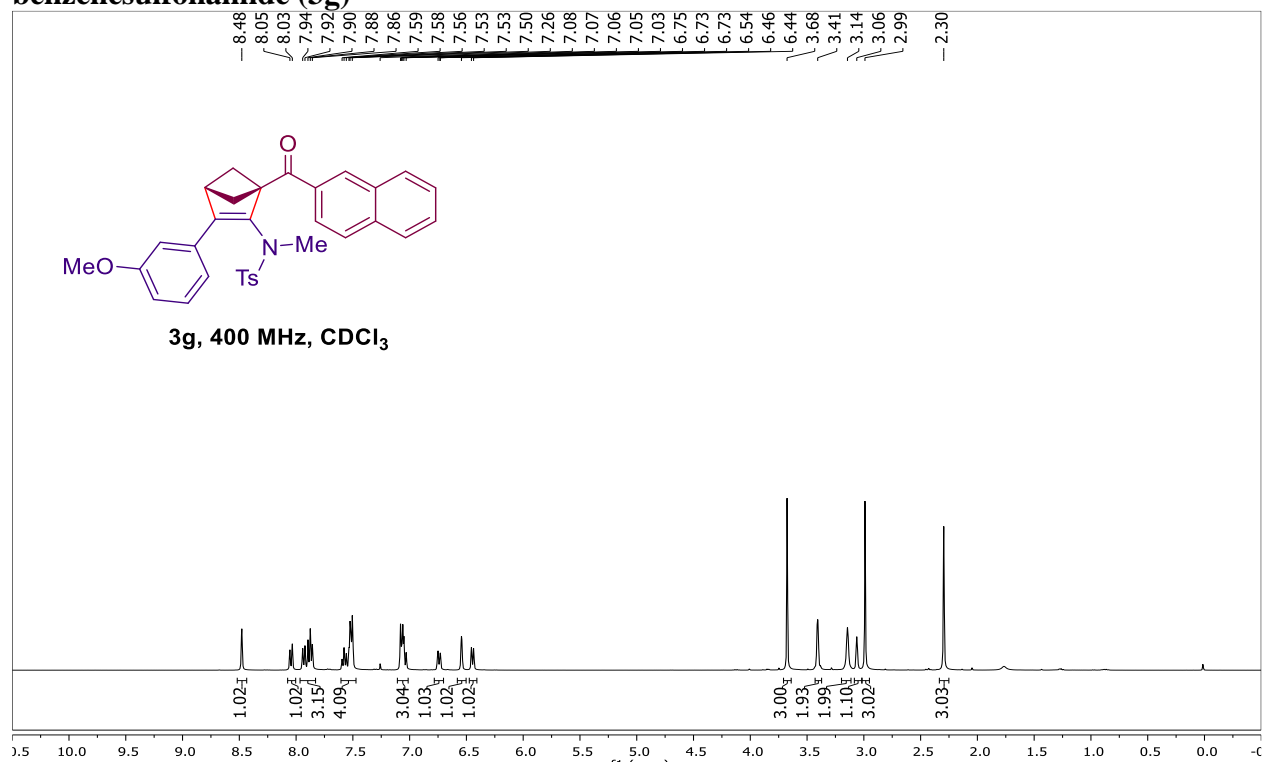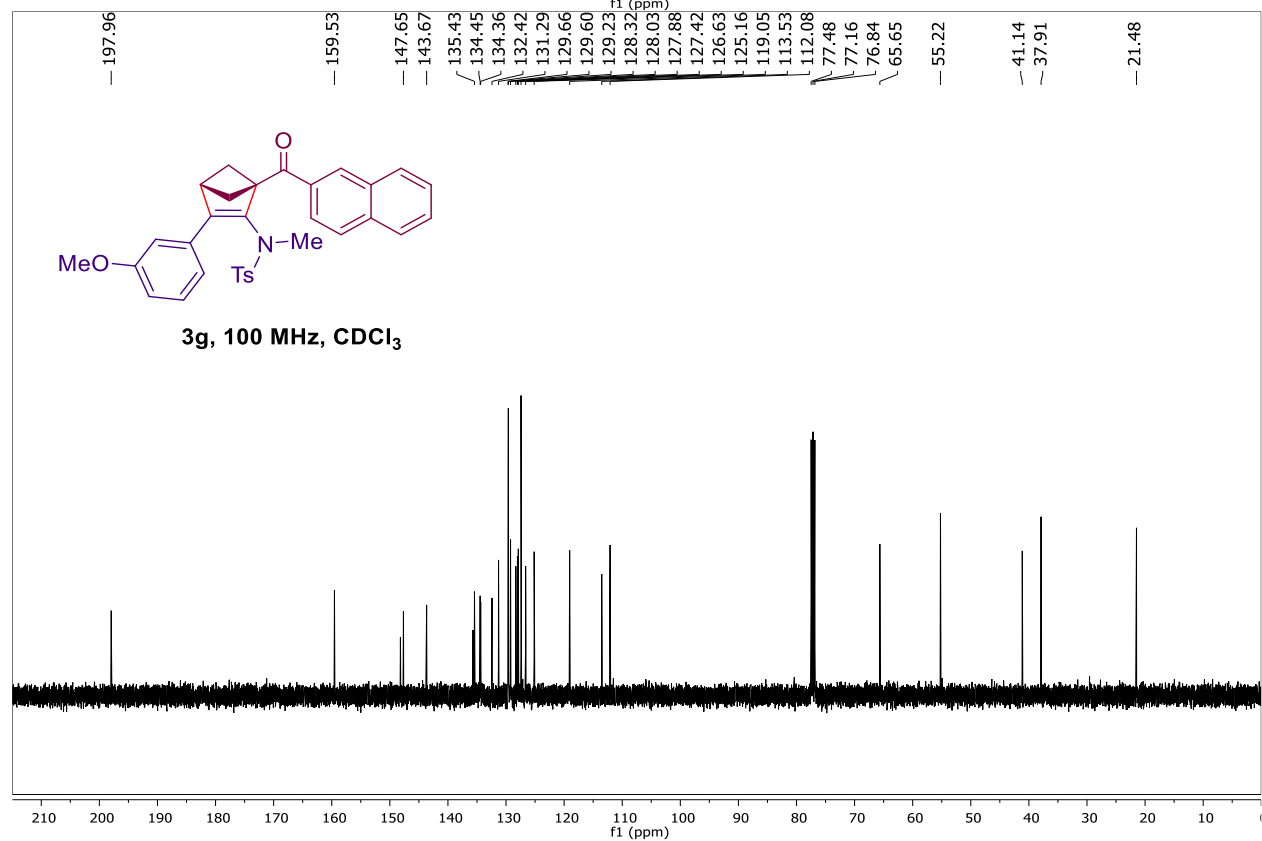

***N*-(1-(2-Naphthoyl)-3-(*m*-tolyl)bicyclo[2.1.1]hex-2-en-2-yl)-*N*,4-dimethylbenzene sulfonamide (3h)**

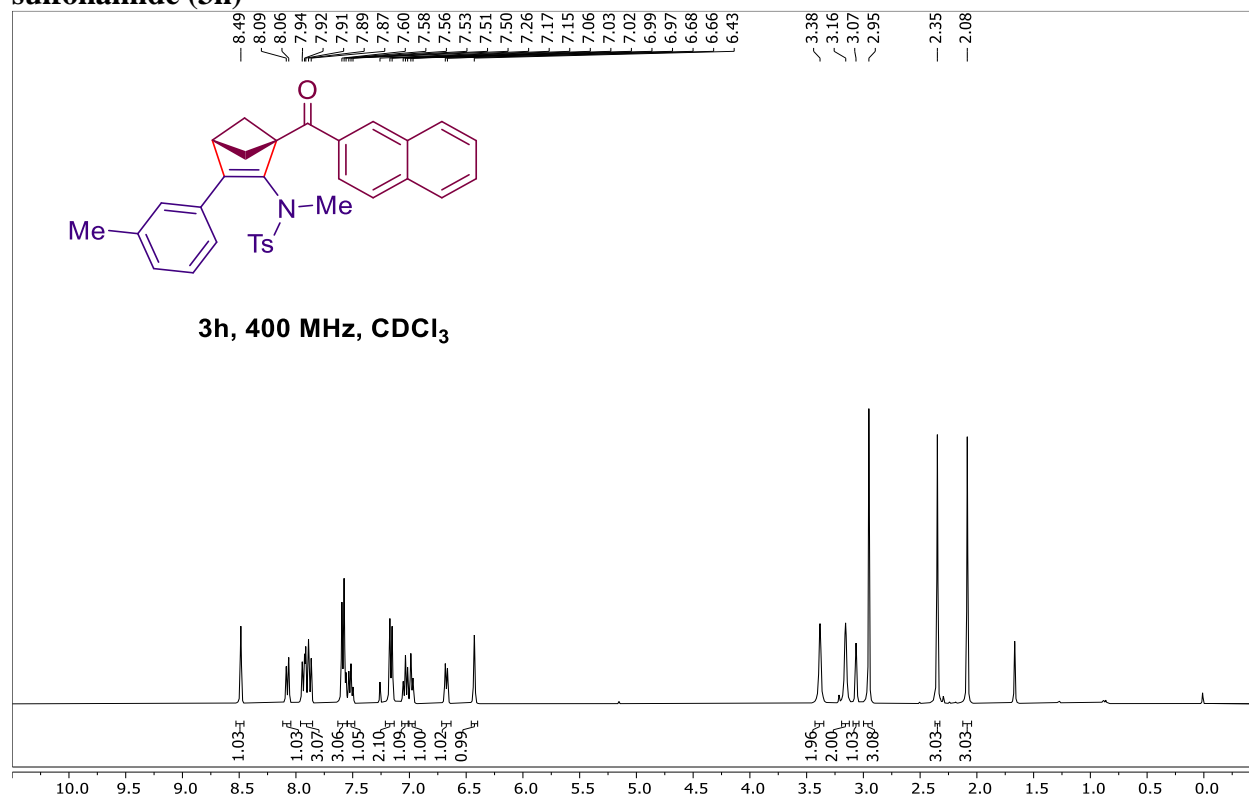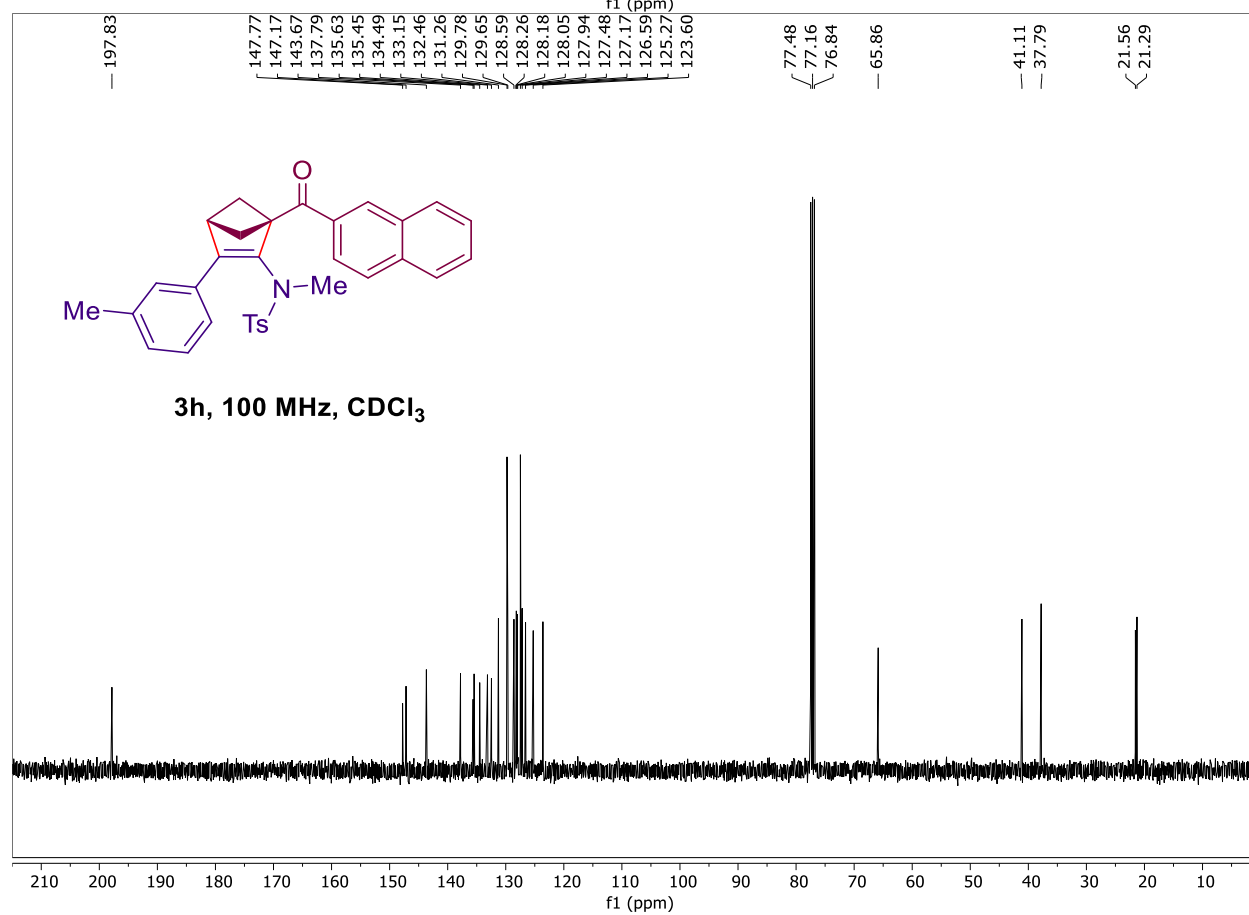

***N*-(1-(2-naphthoyl)-3-(3-chlorophenyl)bicyclo[2.1.1]hex-2-en-2-yl)-*N*,4-dimethyl benzene sulfonamide (3i)**

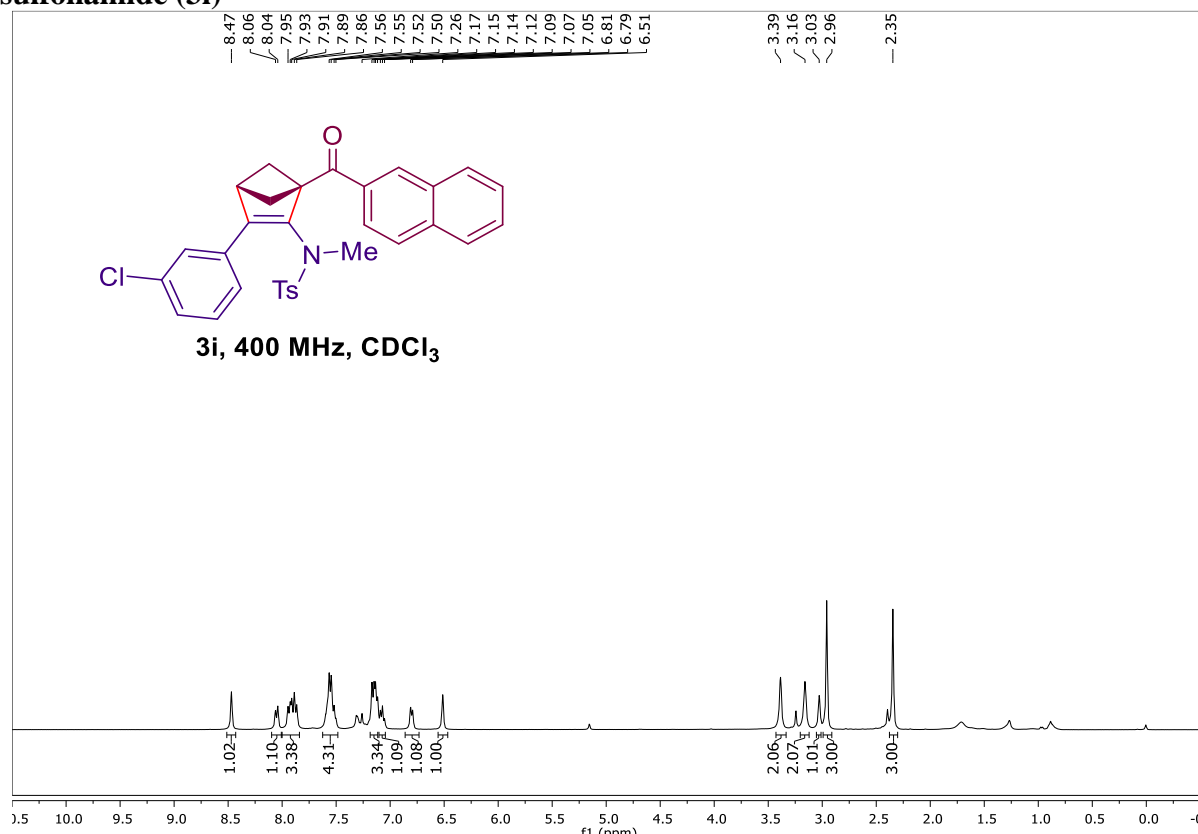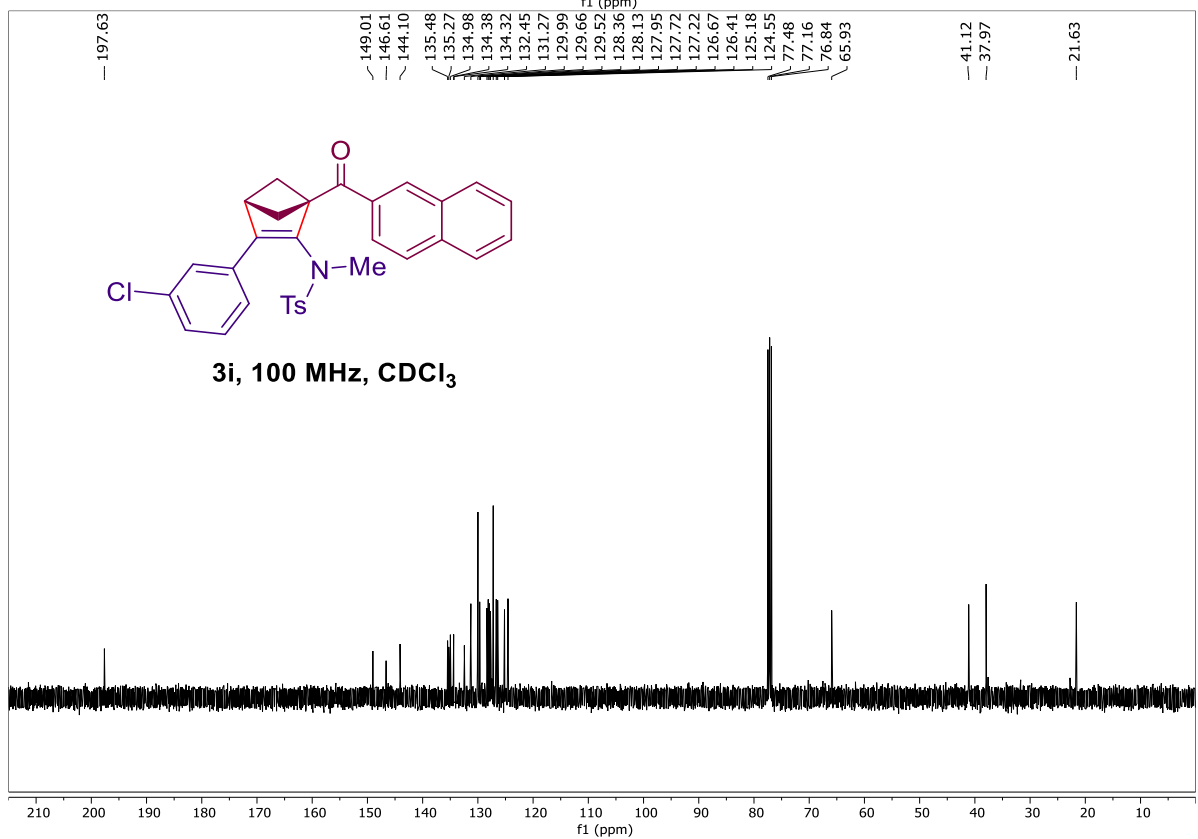

***N*-(1-(2-Naphthoyl)-3-(*o*-tolyl)bicyclo[2.1.1]hex-2-en-2-yl)-*N*,4-dimethylbenzene sulfonamide (3j)**

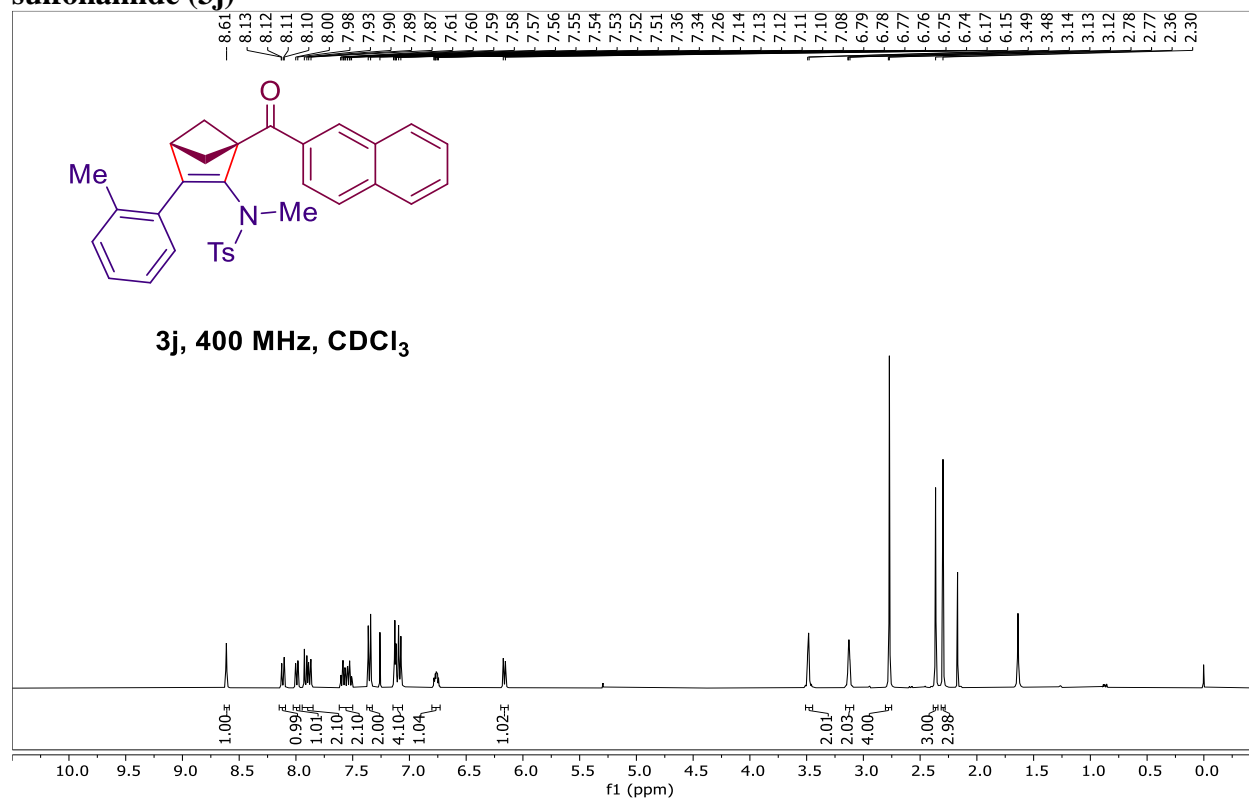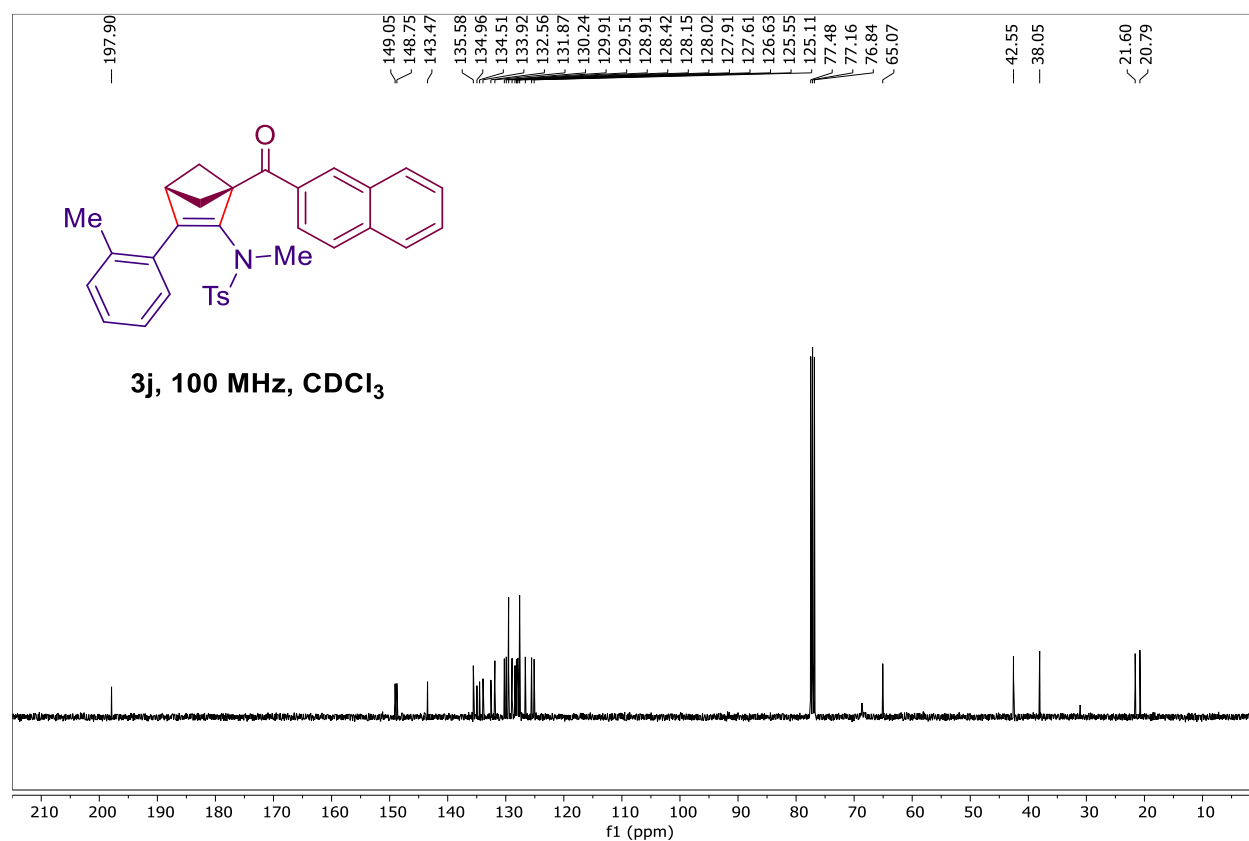

***N*-(1-(2-naphthoyl)-3-(naphthalen-2-yl)bicyclo[2.1.1]hex-2-en-2-yl)-*N*,4-dimethylbenzenesulfonamide (3k)**

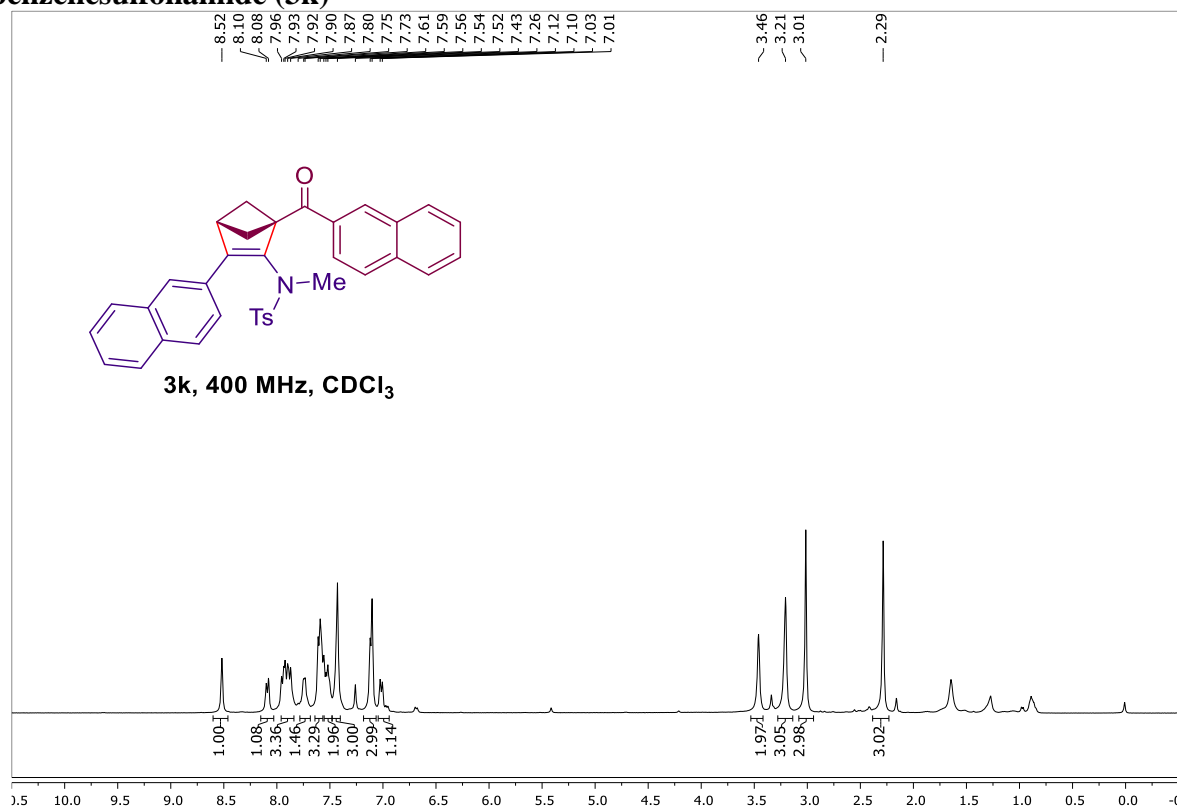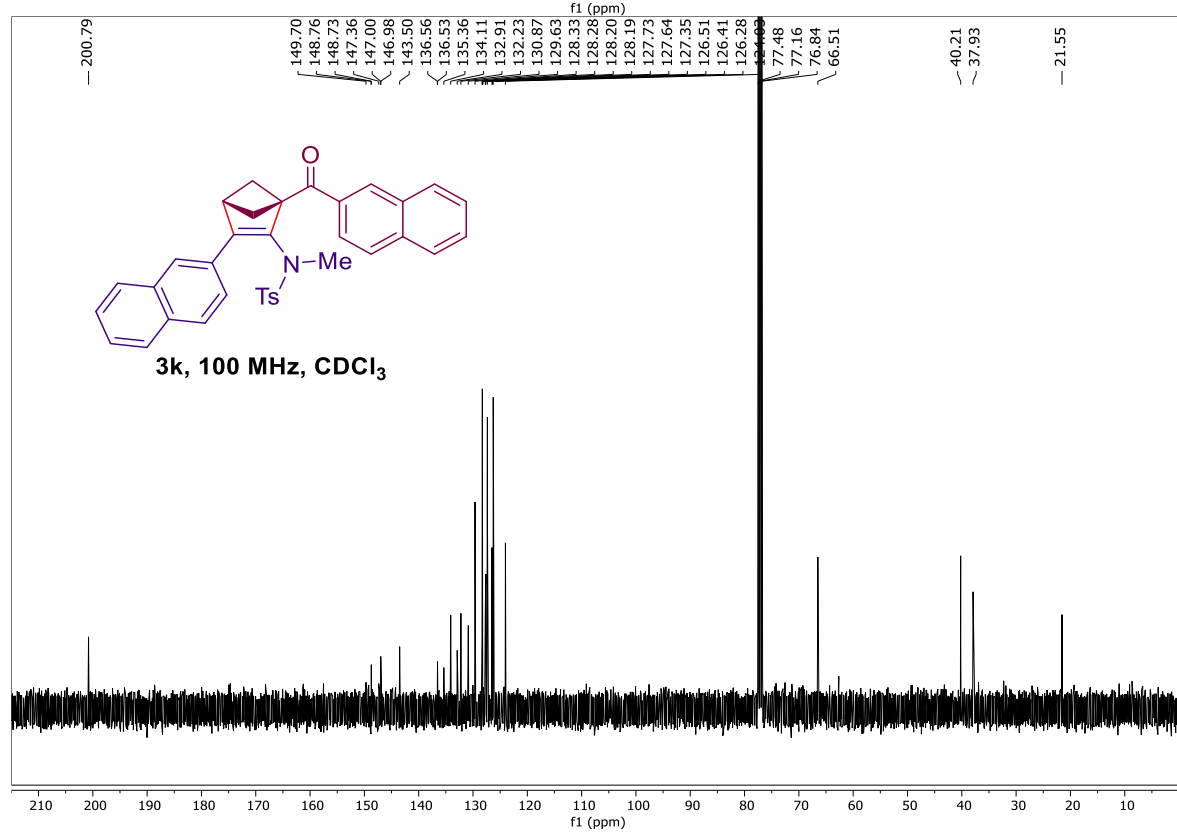



***N*-(1-(2-Naphthoyl)-3-(thiophen-2-yl)bicyclo[2.1.1]hex-2-en-2-yl)-*N*,4-dimethylbenzene sulfonamide (3l)**

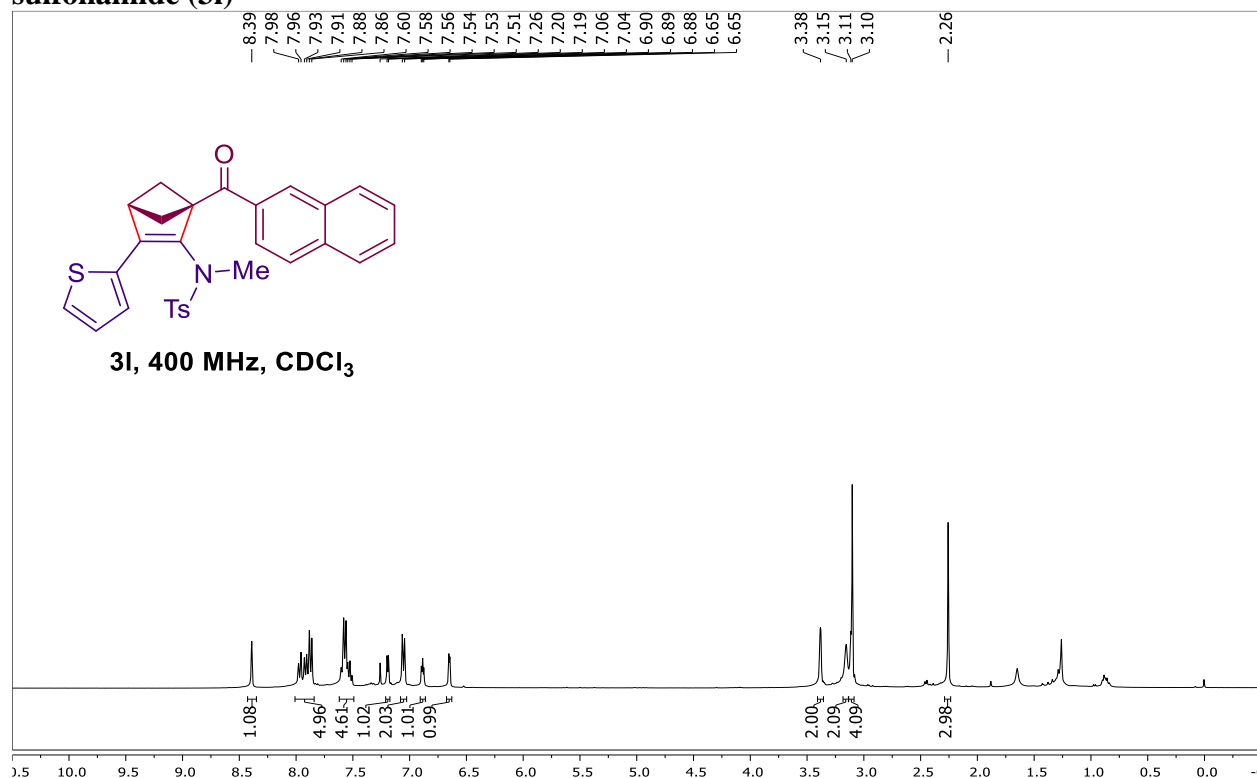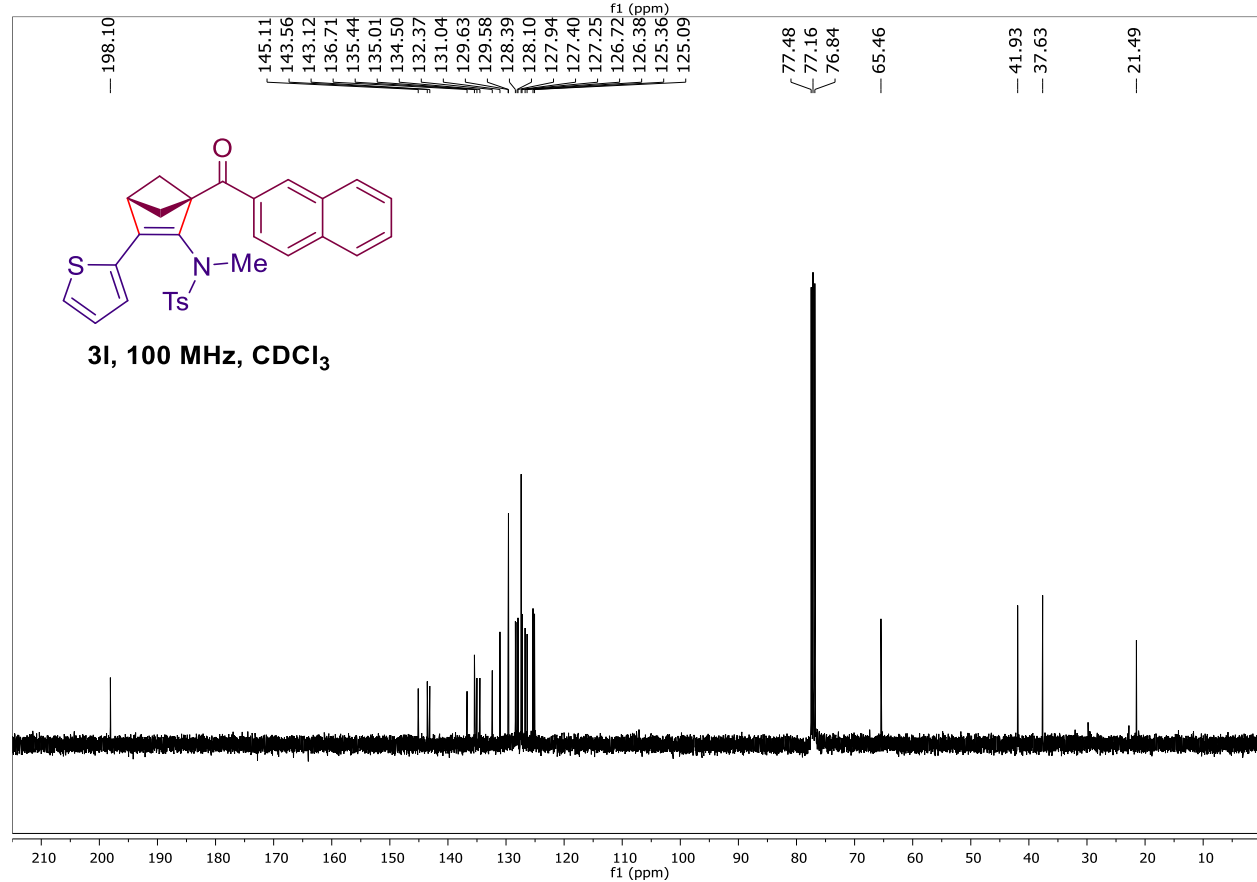

***N*-(1-(2-Naphthoyl)-3-phenylbicyclo[2.1.1]hex-2-en-2-yl)-4-chloro-*N*-methylbenzene sulfonamide (3m)**

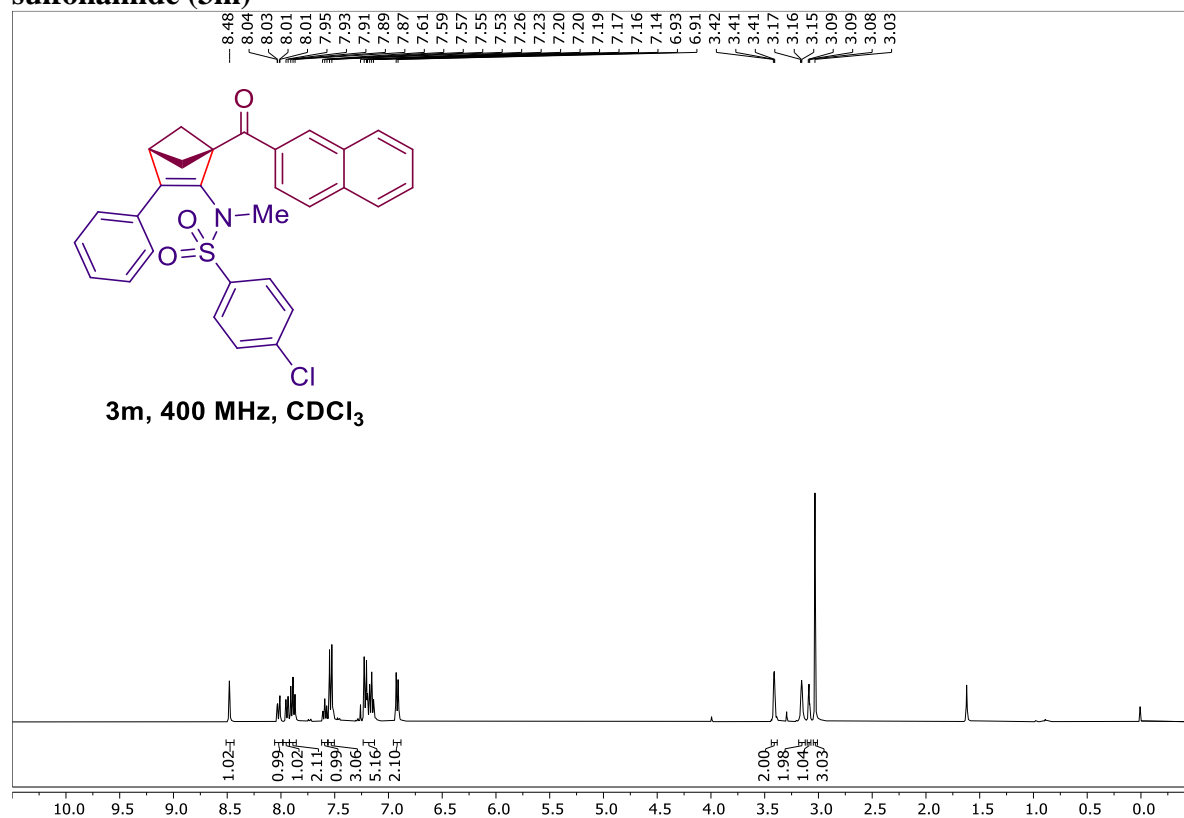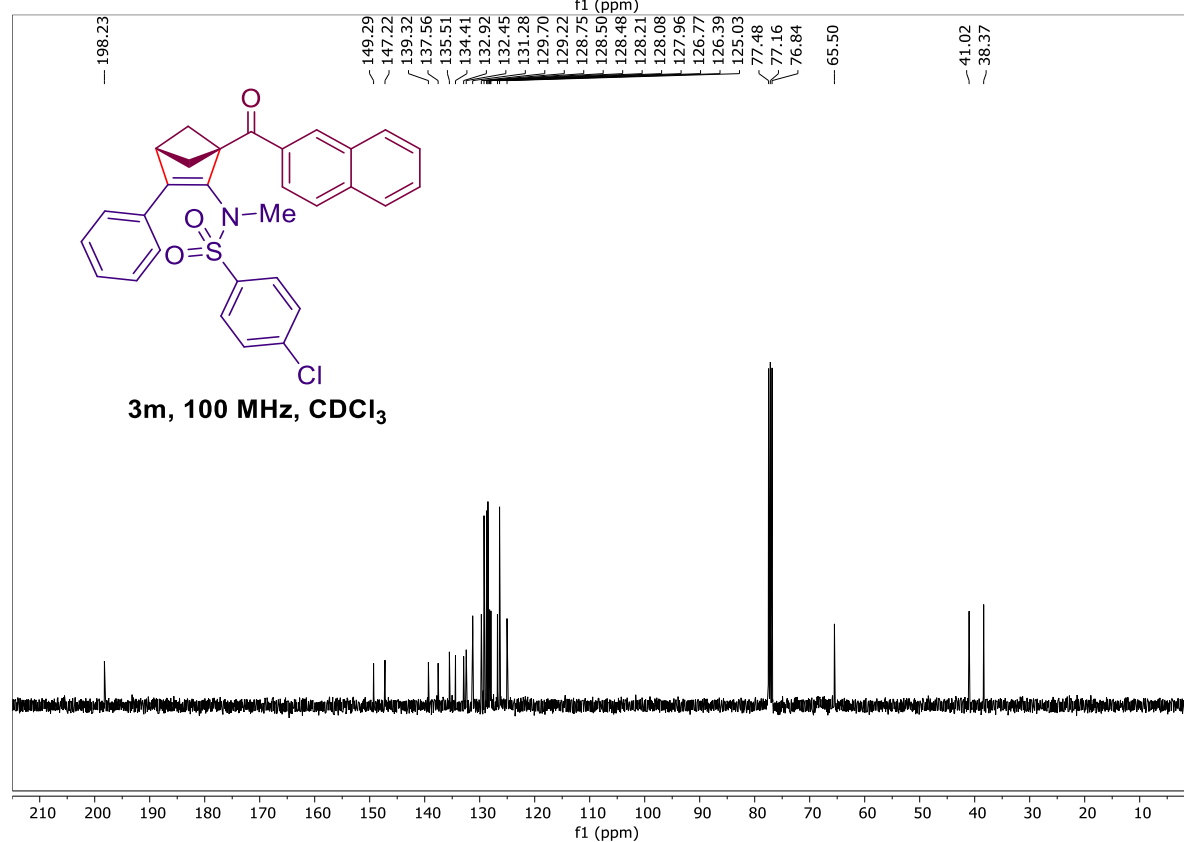

***N*-(1-(2-Naphthoyl)-3-phenylbicyclo[2.1.1]hex-2-en-2-yl)-*N*-methyl-[1,1'-biphenyl]-4-sulfonamide (3n)**

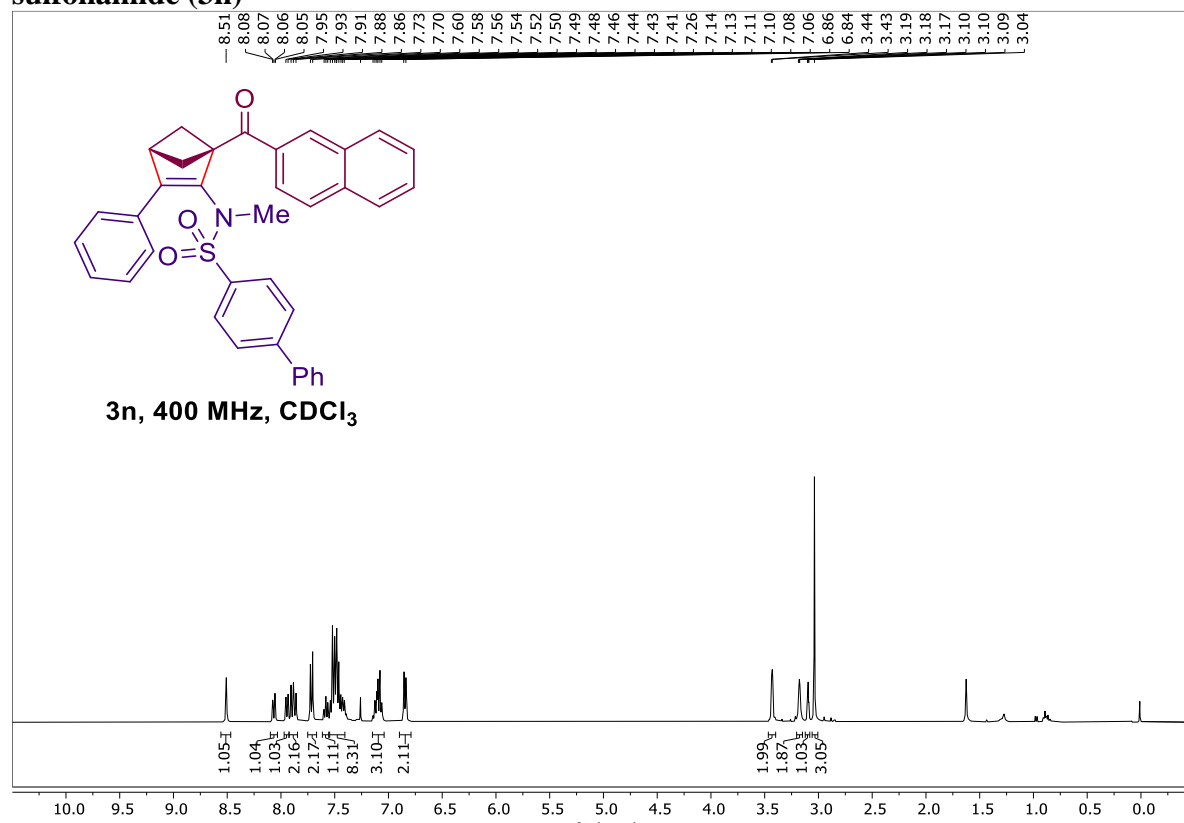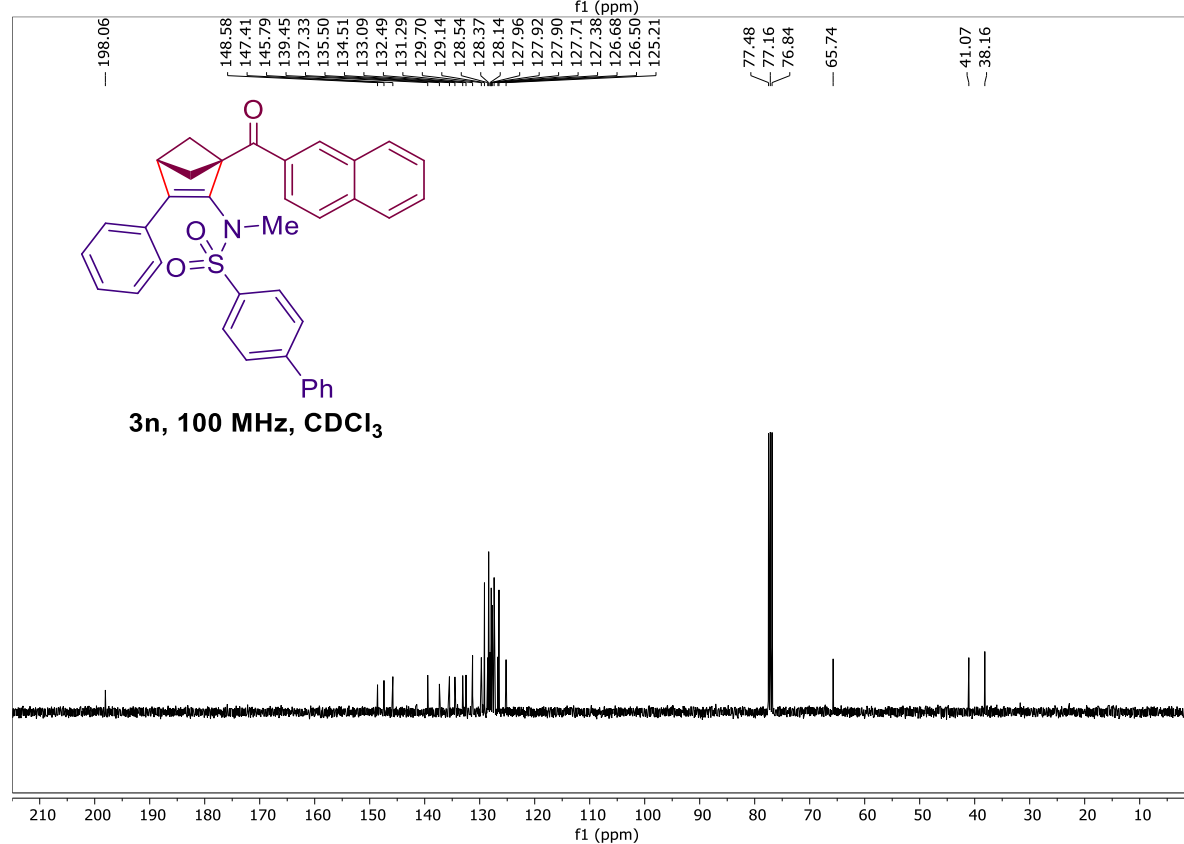

***N*-(1-(2-Naphthoyl)-3-phenylbicyclo[2.1.1]hex-2-en-2-yl)-*N*,3-dimethylbenzene sulfonamide (3o)**

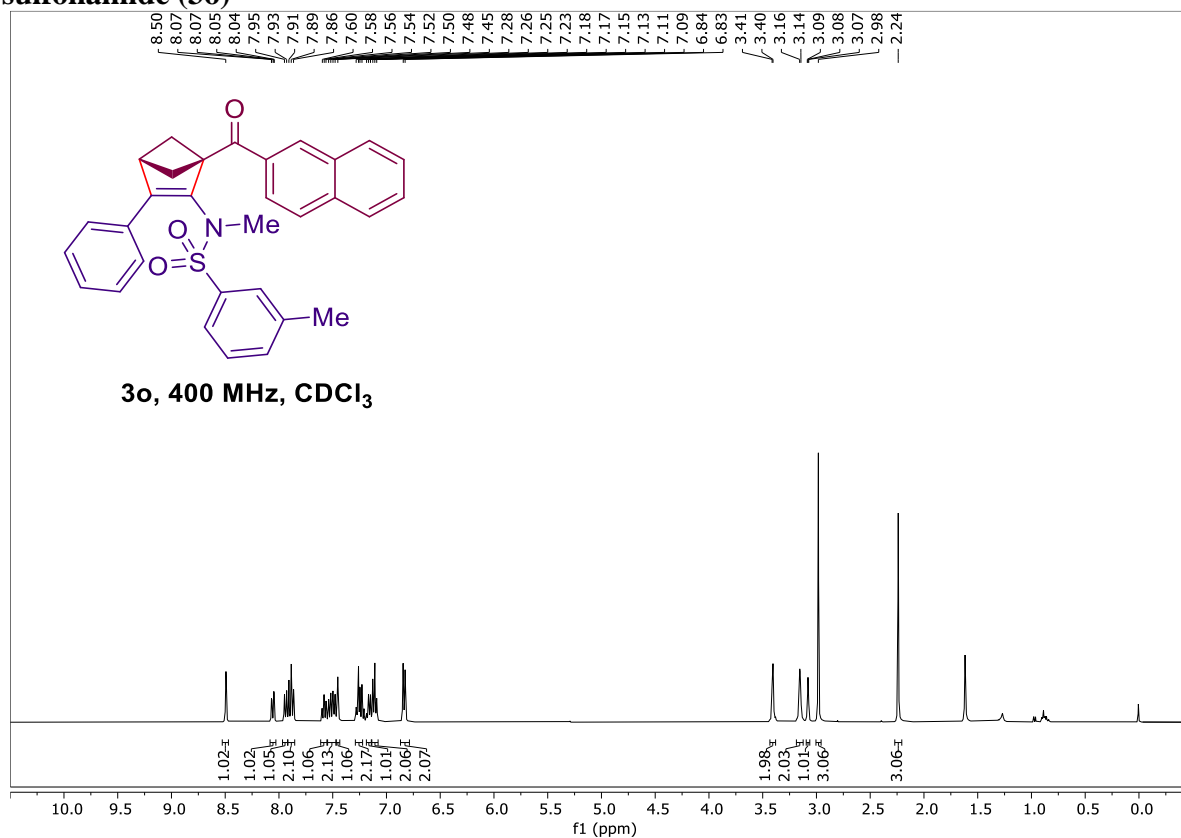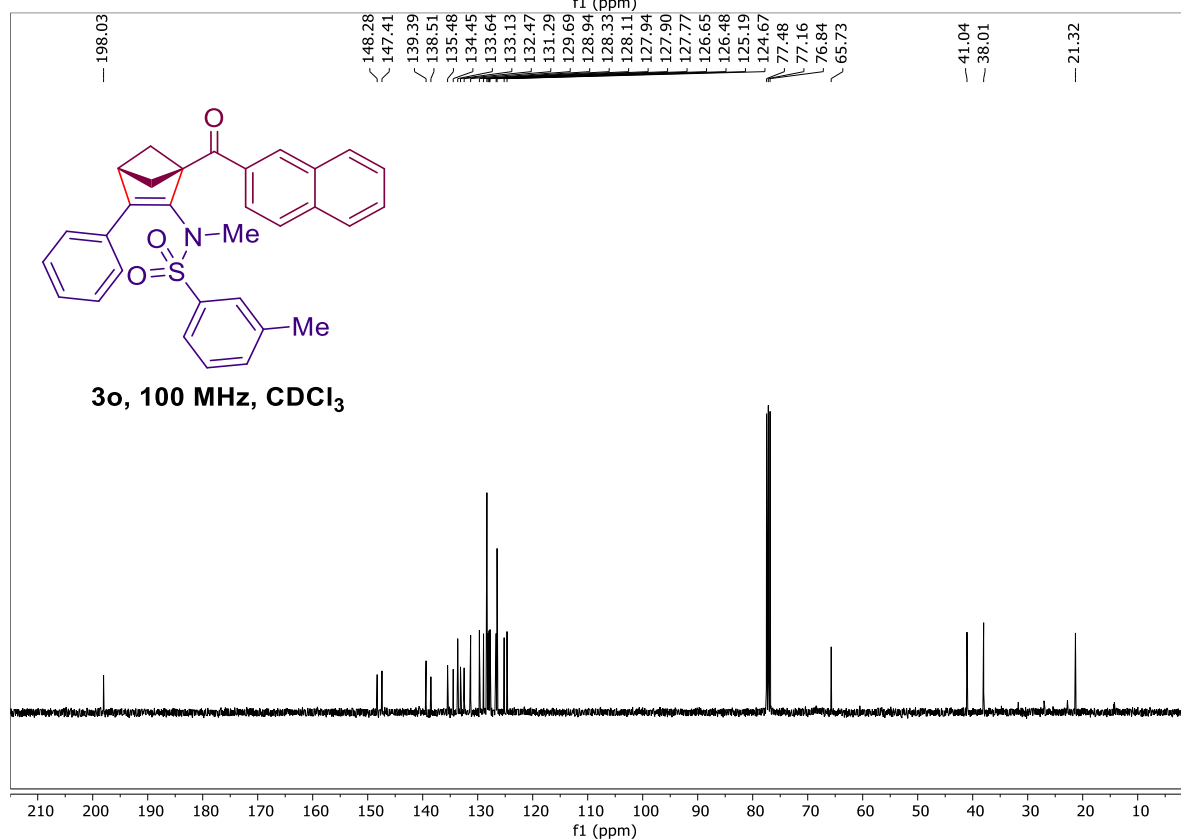

***N*-(1-(2-Naphthyl)-3-phenylbicyclo[2.1.1]hex-2-en-2-yl)-*N*-methylbutane-1-sulfonamide (3p)**

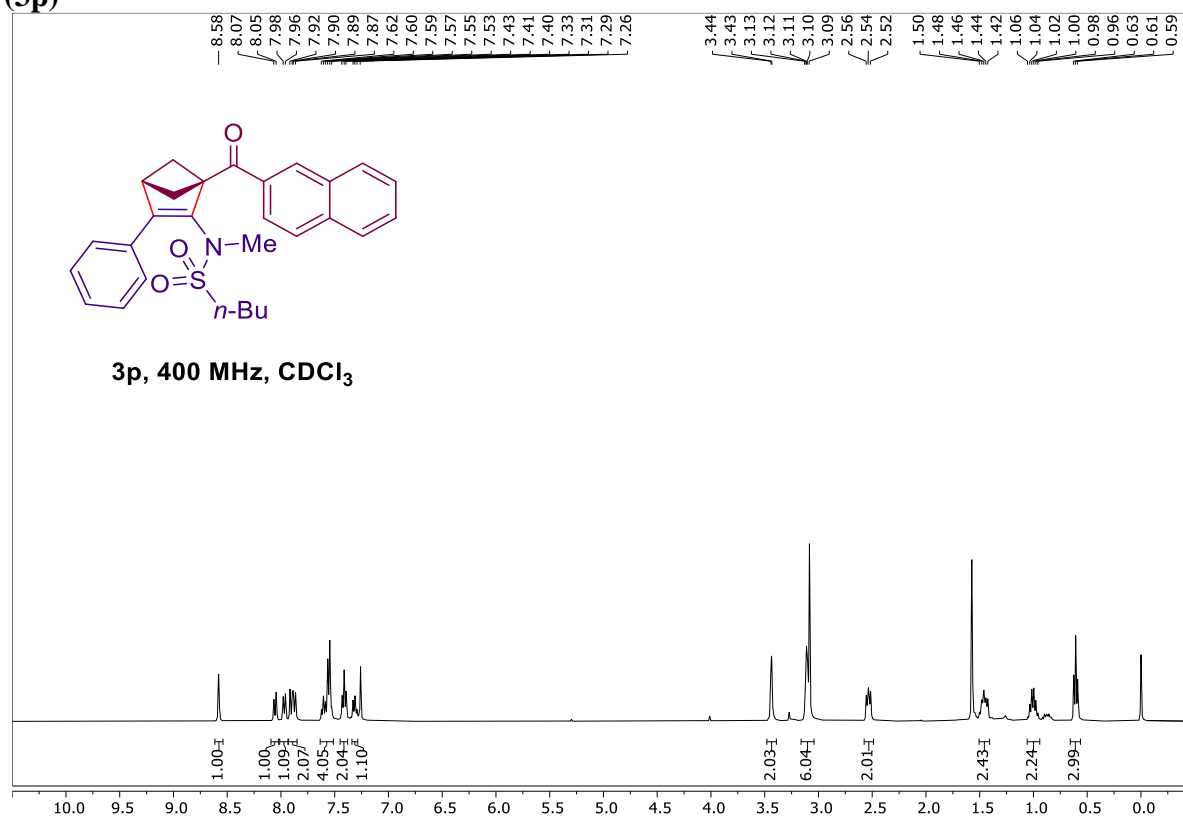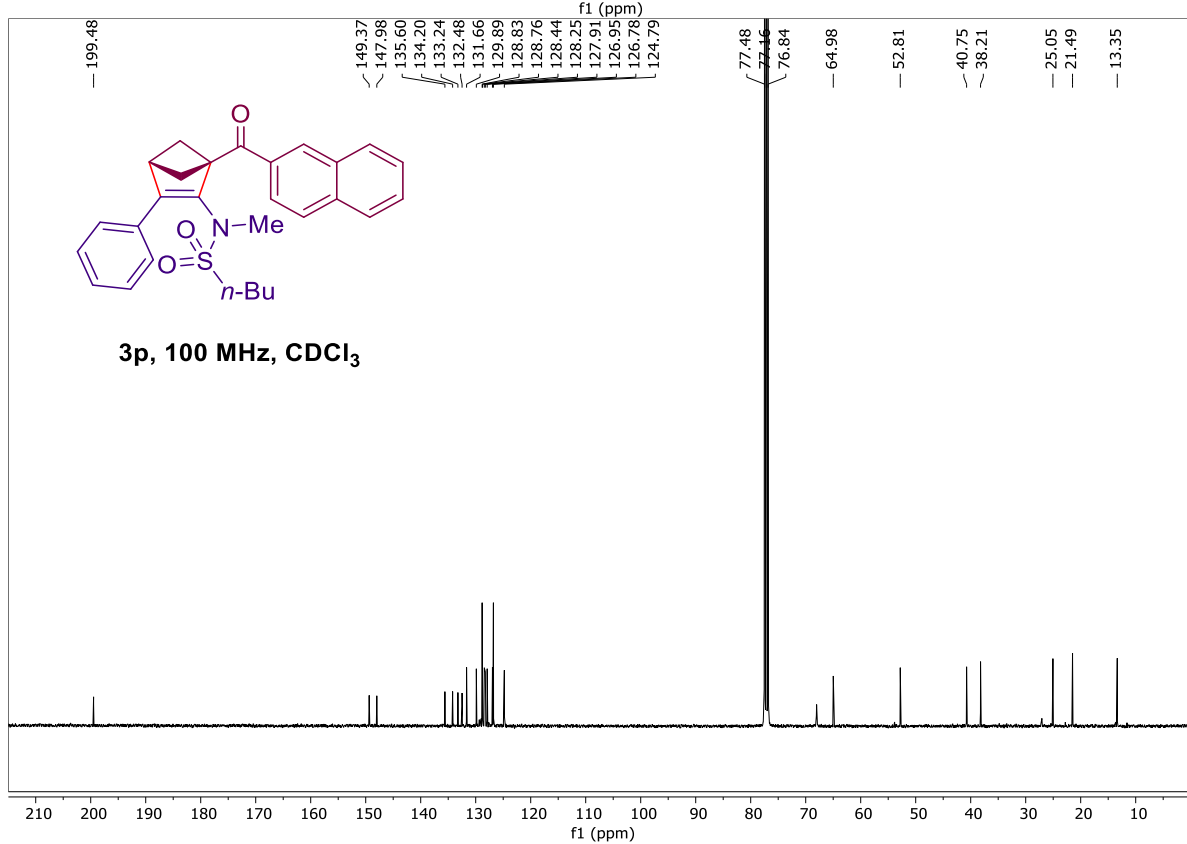

***N*-(1-(2-Naphthoyl)-3-phenylbicyclo[2.1.1]hex-2-en-2-yl)-*N*-methylcyclopropane sulfonamide (3q)**

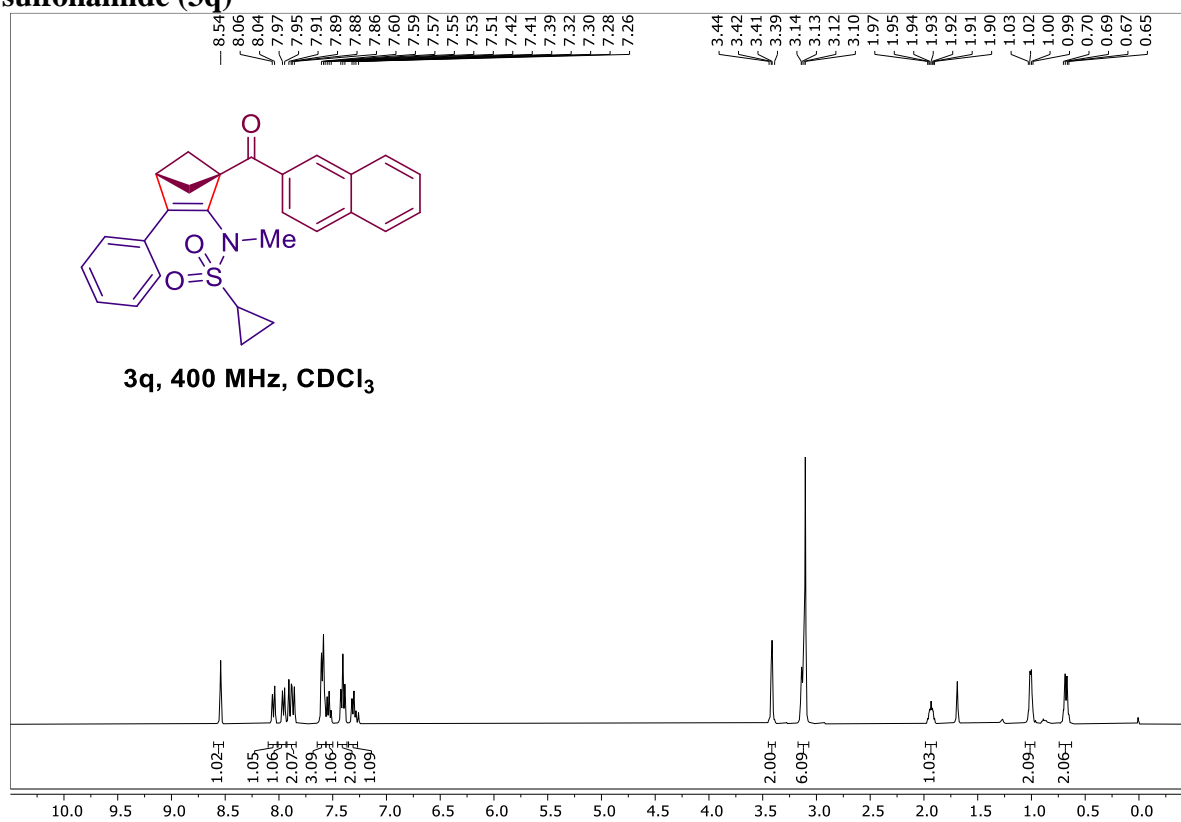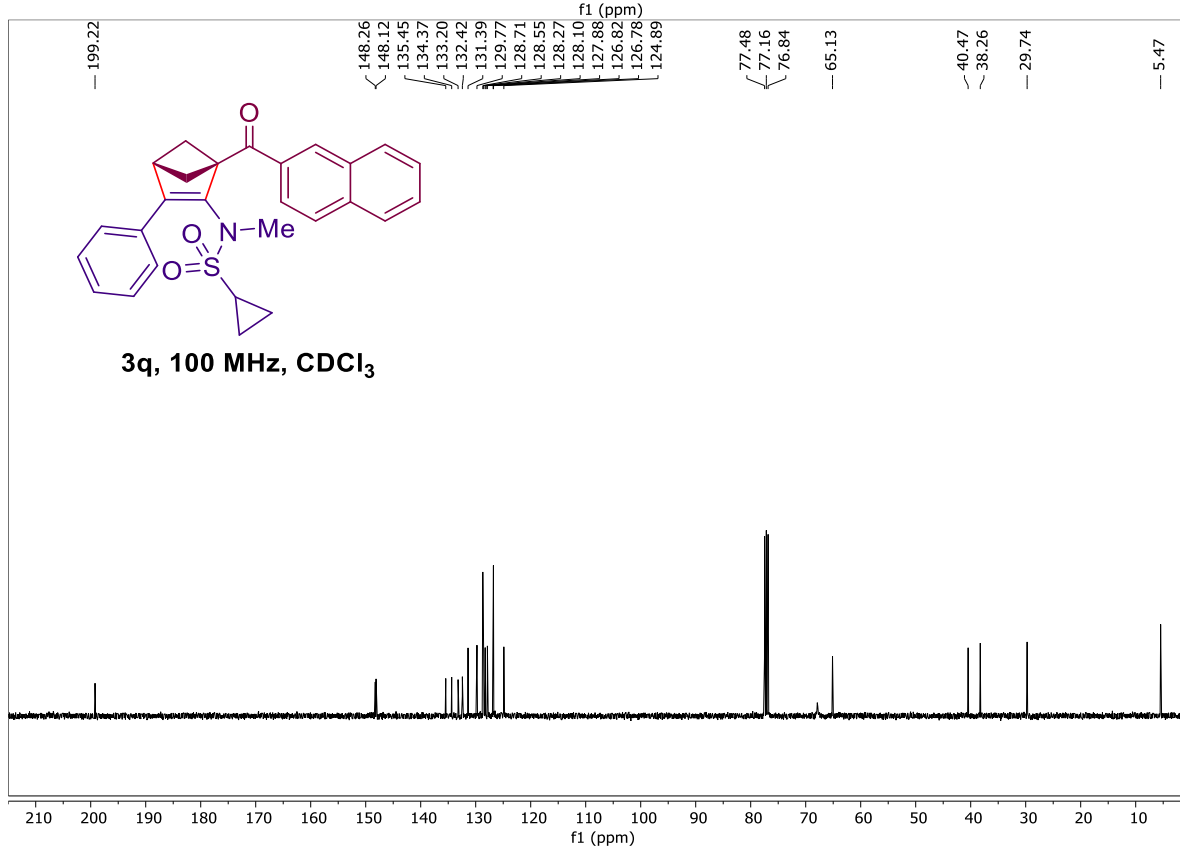

***N*-(1-(2-Naphthoyl)-3-phenylbicyclo[2.1.1]hex-2-en-2-yl)-*N*-methylmethanesulfonamide (3r)**

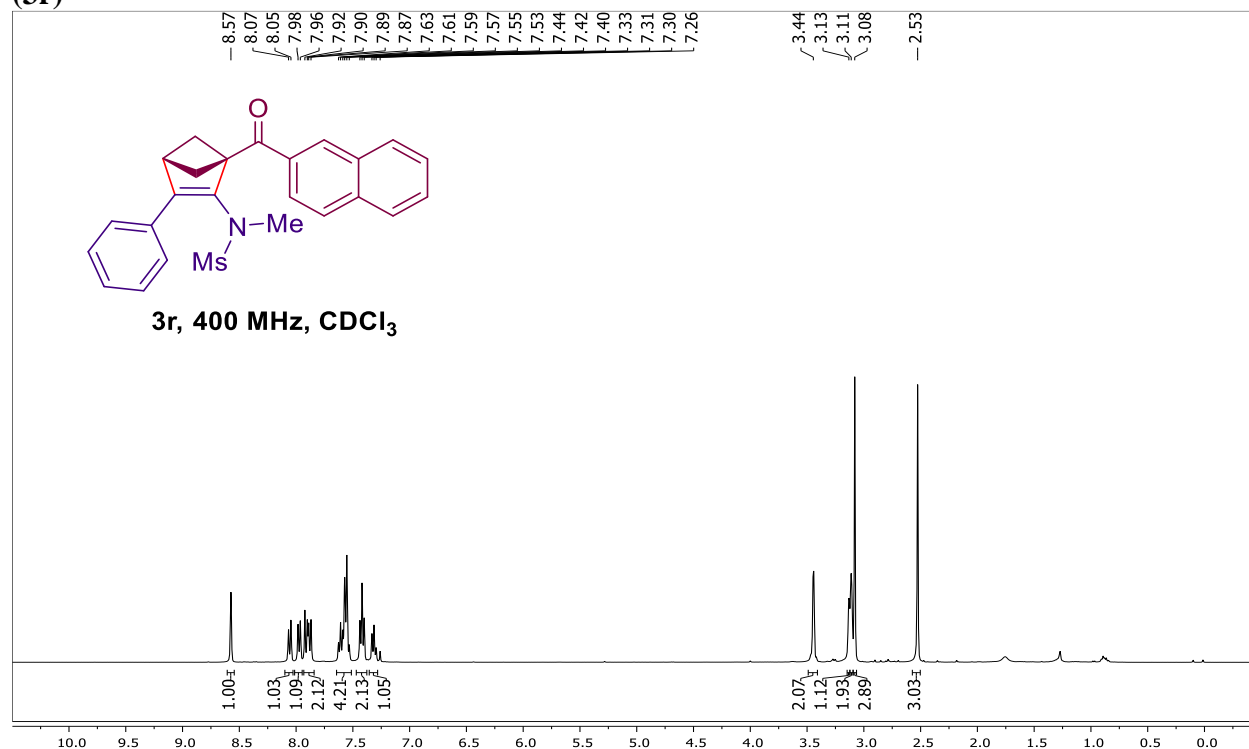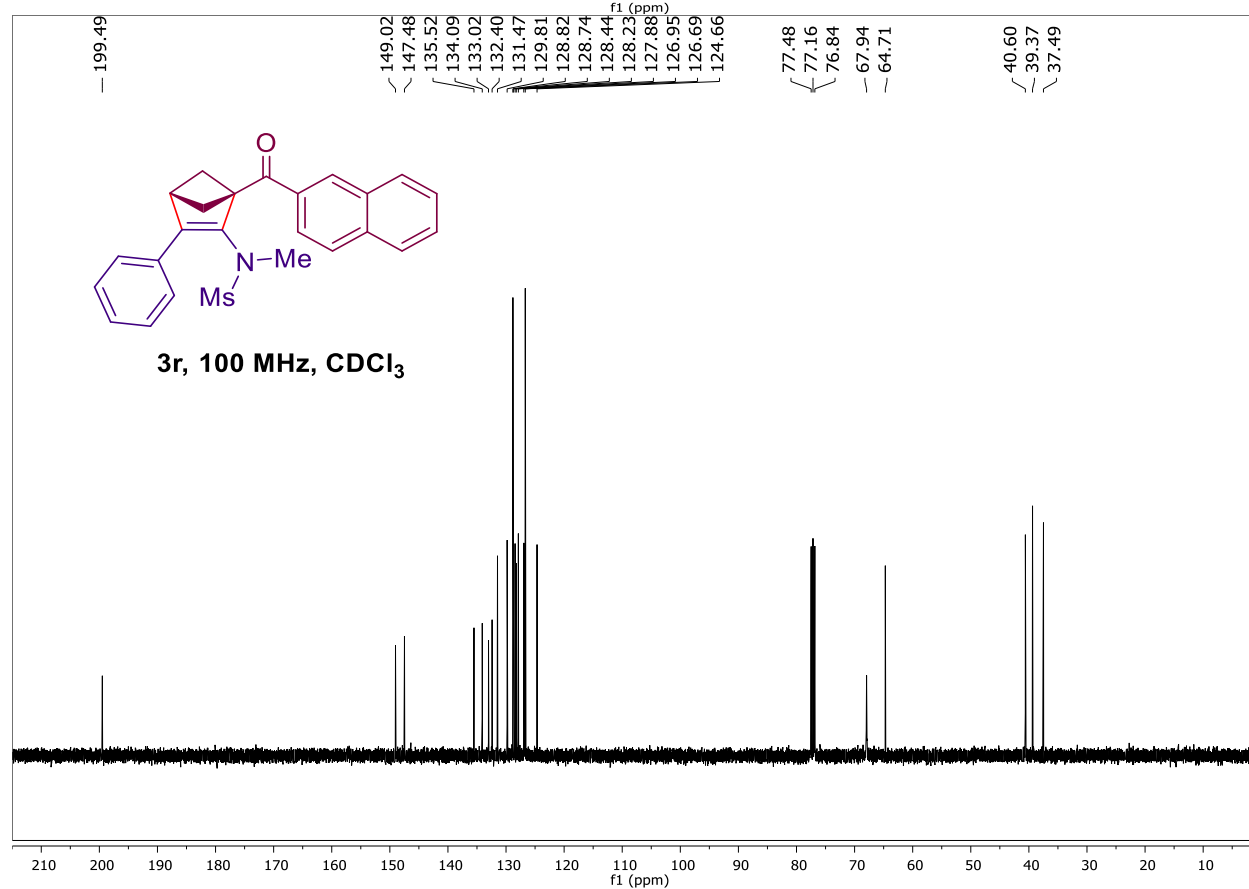



***N*-(1-(2-Naphthoyl)-3-phenylbicyclo[2.1.1]hex-2-en-2-yl)-*N*-ethyl-4-methylbenzene sulfonamide (3s)**

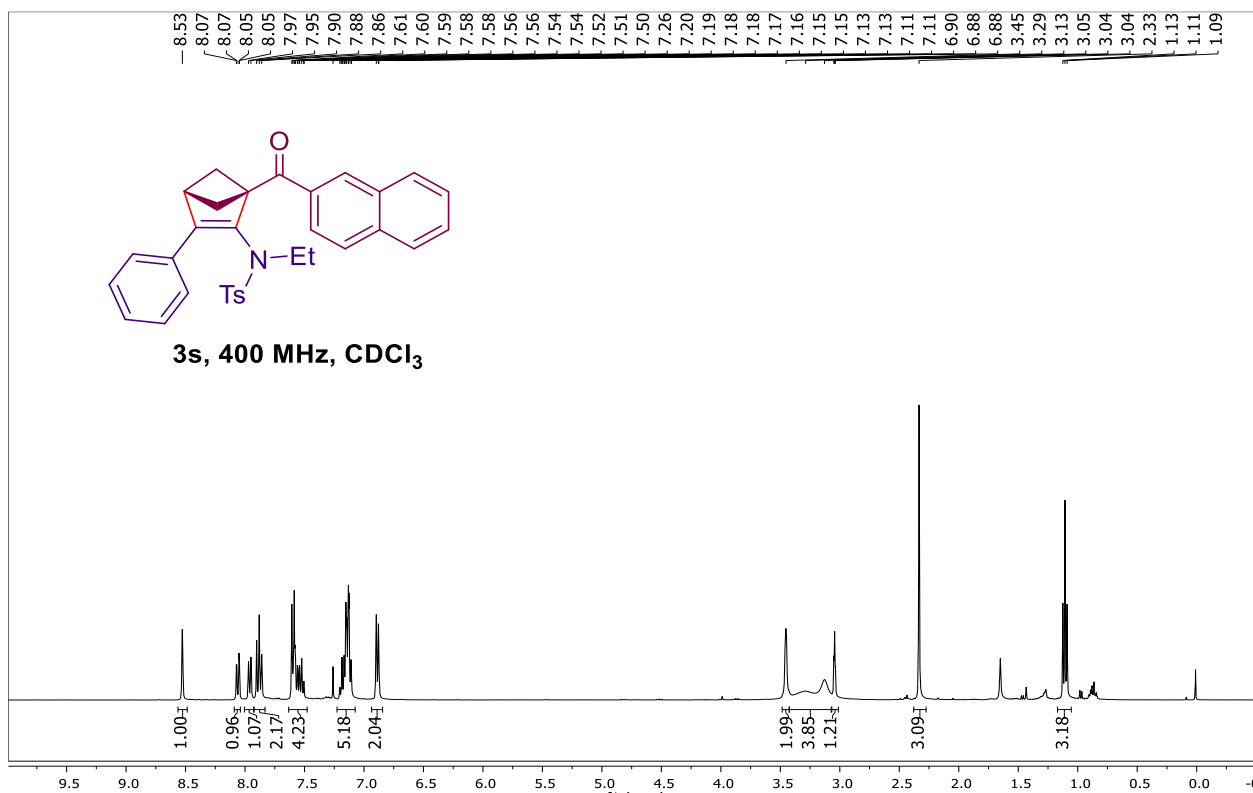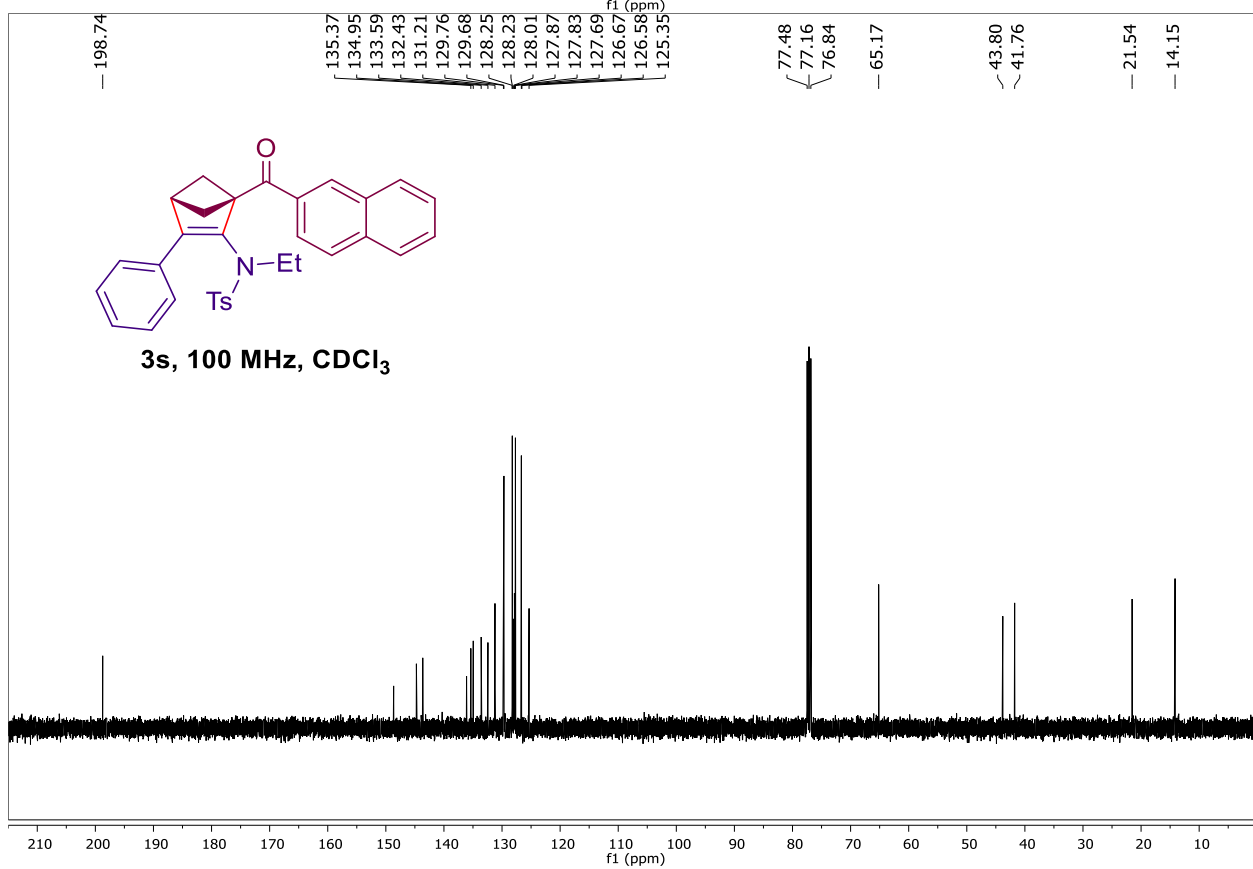

***N*-(1-(2-Naphthoyl)-3-phenylbicyclo[2.1.1]hex-2-en-2-yl)-*N*-butyl-4-methylbenzene sulfonamide (3t)**

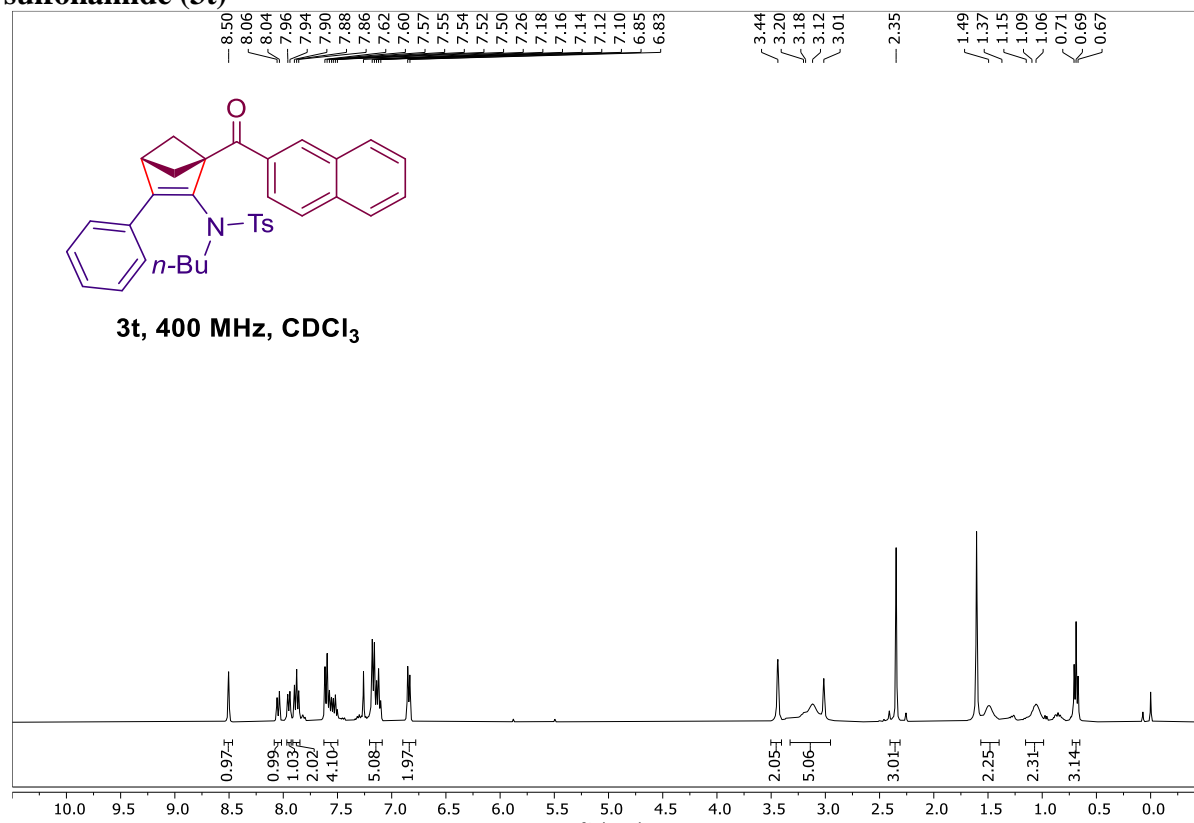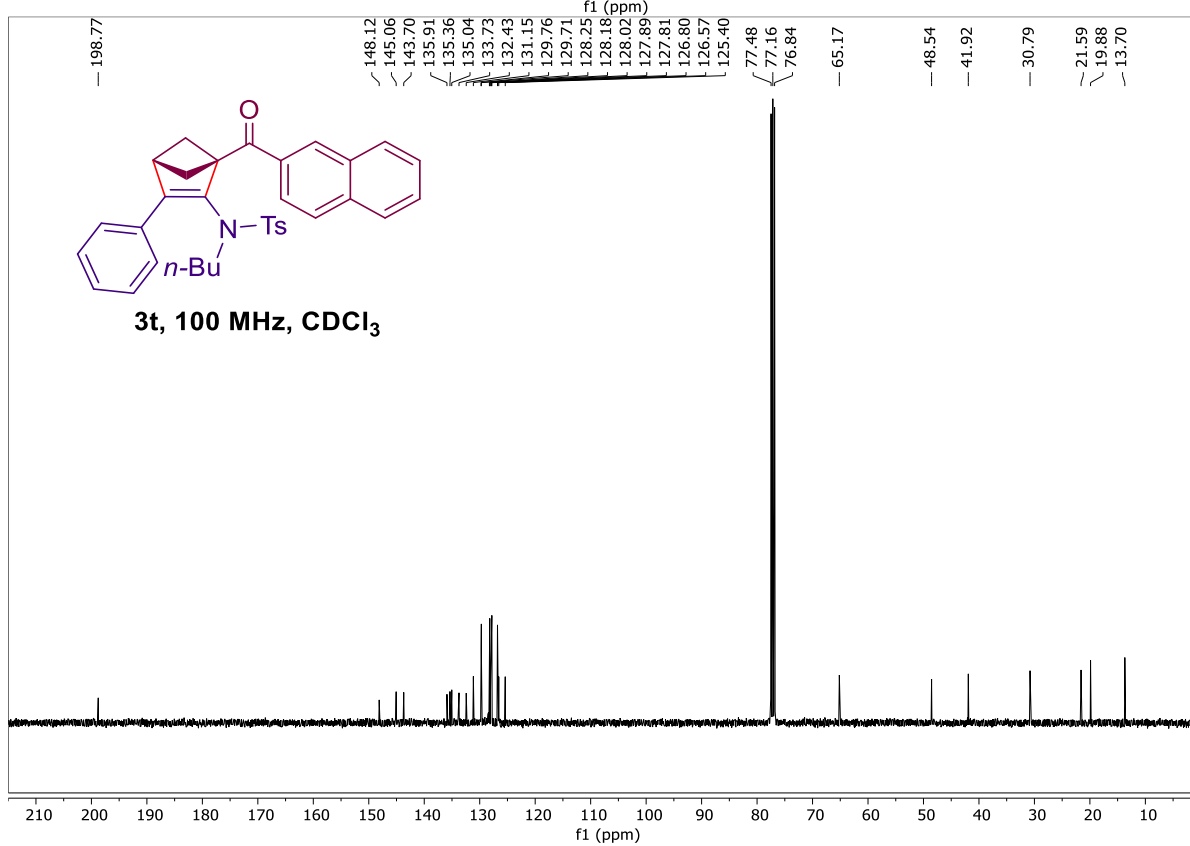

***N*-(1-(2-Naphthoyl)-3-phenylbicyclo[2.1.1]hex-2-en-2-yl)-*N*-cyclopropyl-4-methylbenzene sulfonamide (3u)**

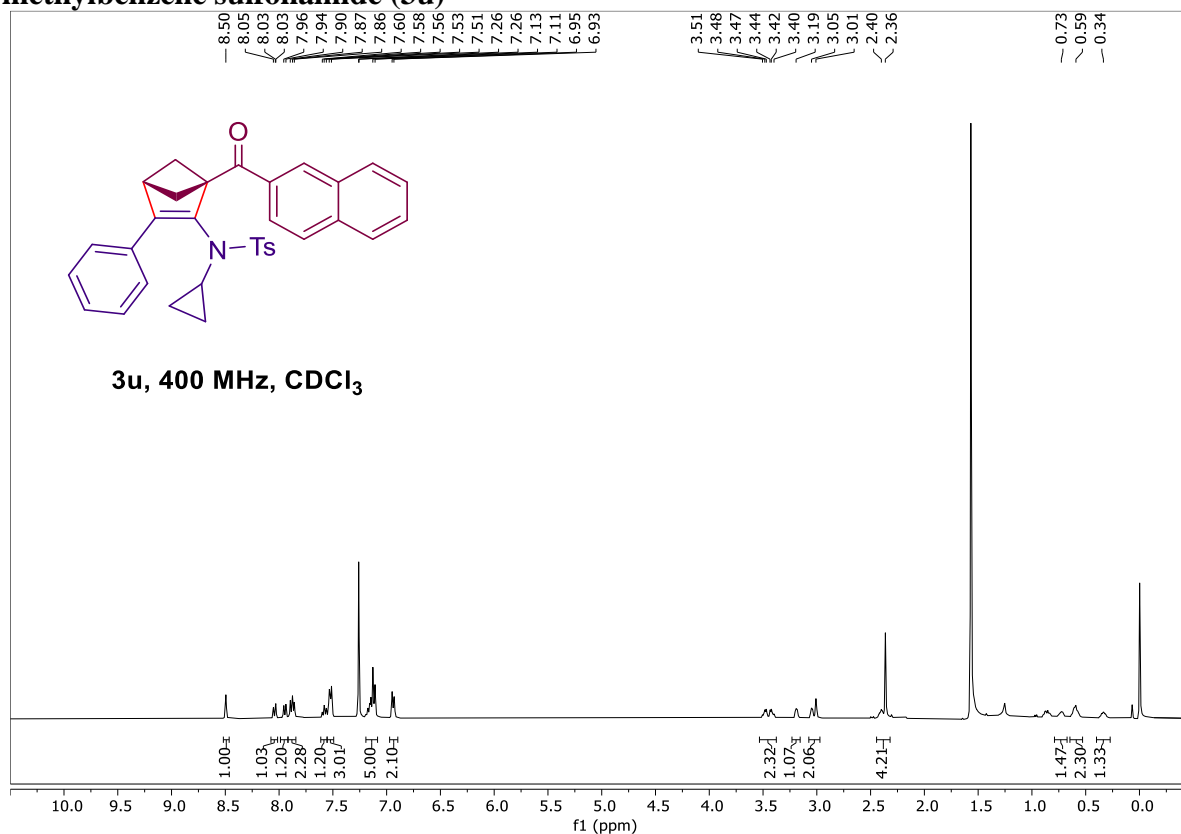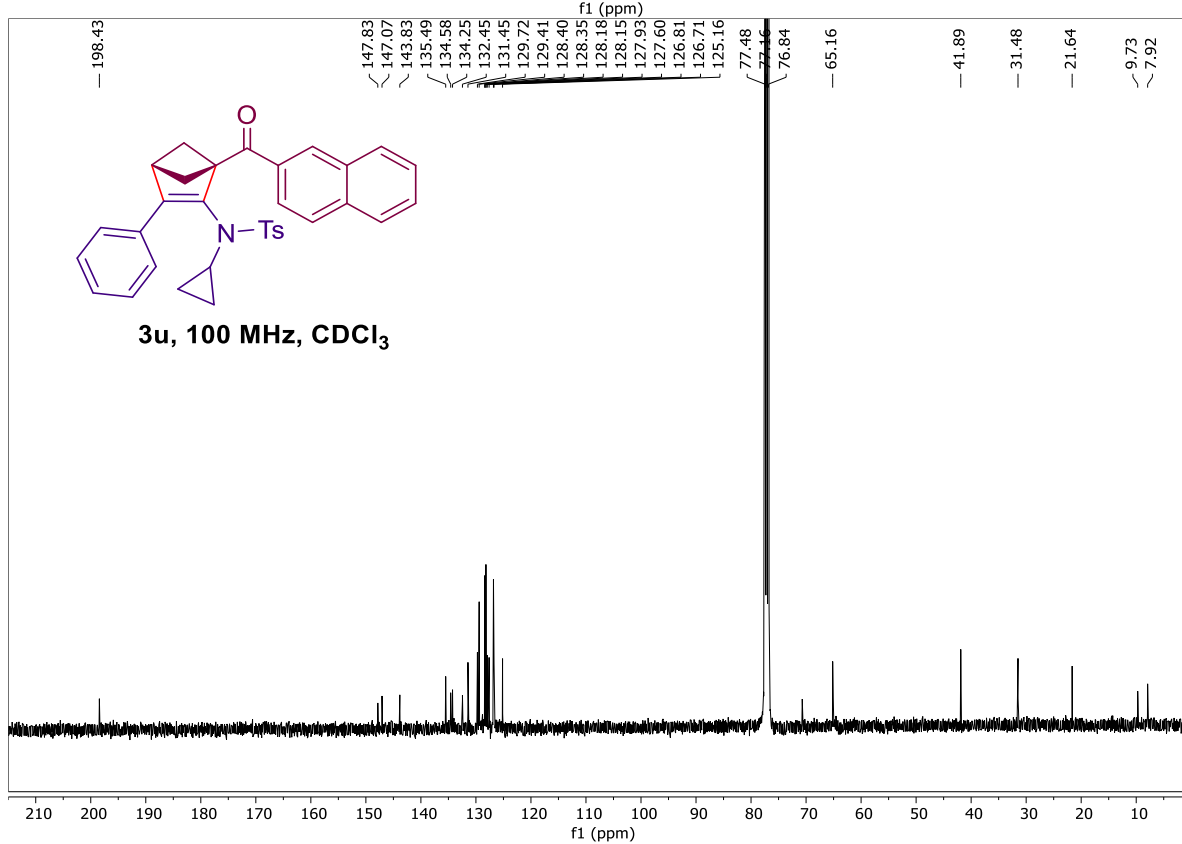

***N*-(1-(2-Naphthoyl)-3-phenylbicyclo[2.1.1]hex-2-en-2-yl)-*N*-cyclohexyl-4-methylbenzene sulfonamide (3v)**

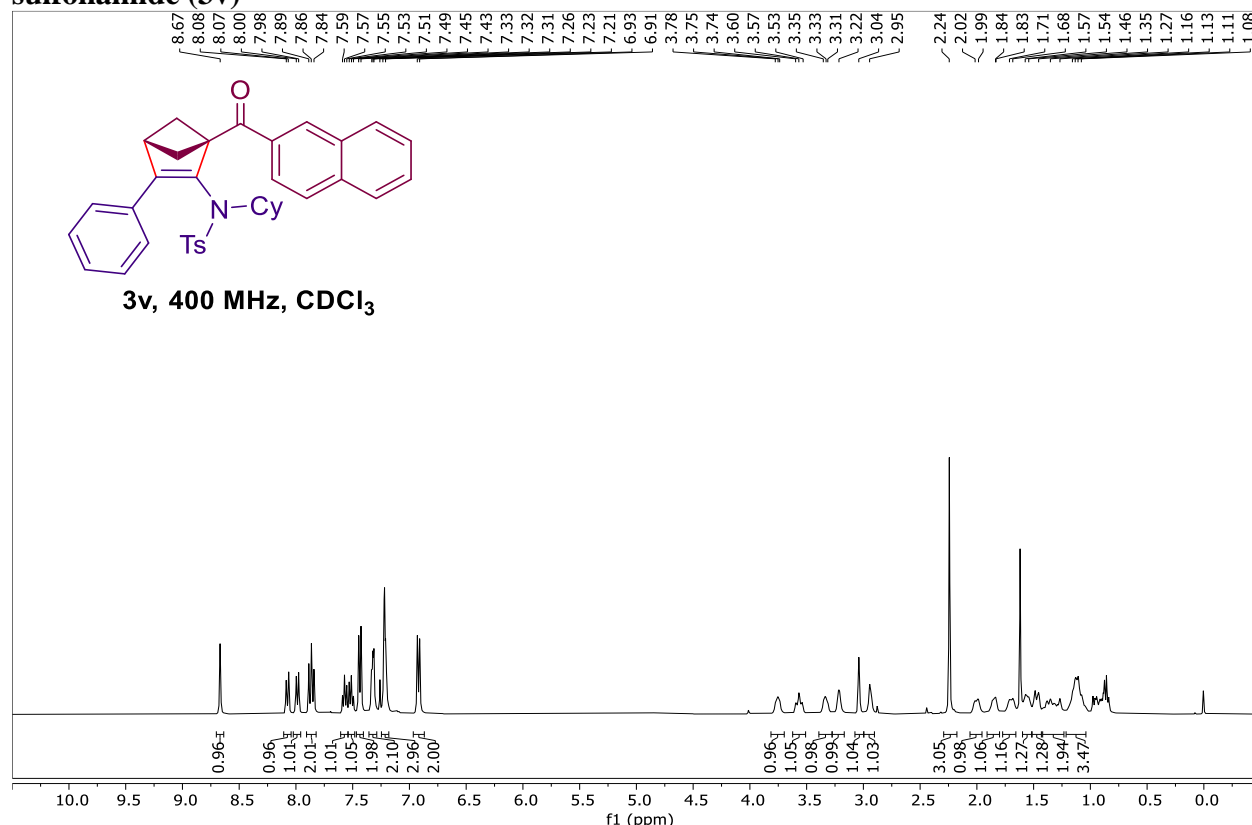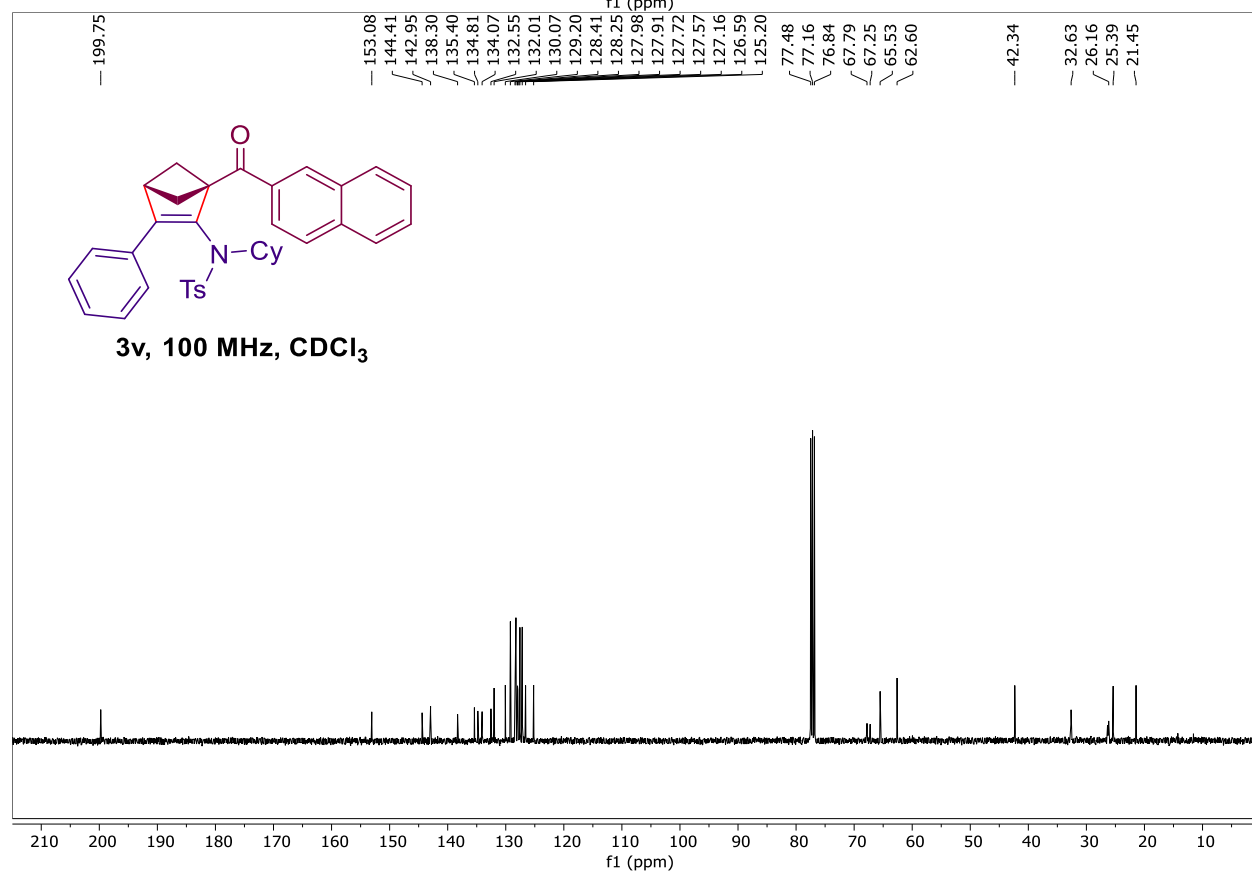

***N*-(1-(2-Naphthoyl)-3-phenylbicyclo[2.1.1]hex-2-en-2-yl)-4-methyl-*N*-phenylbenzene sulfonamide (3w)**

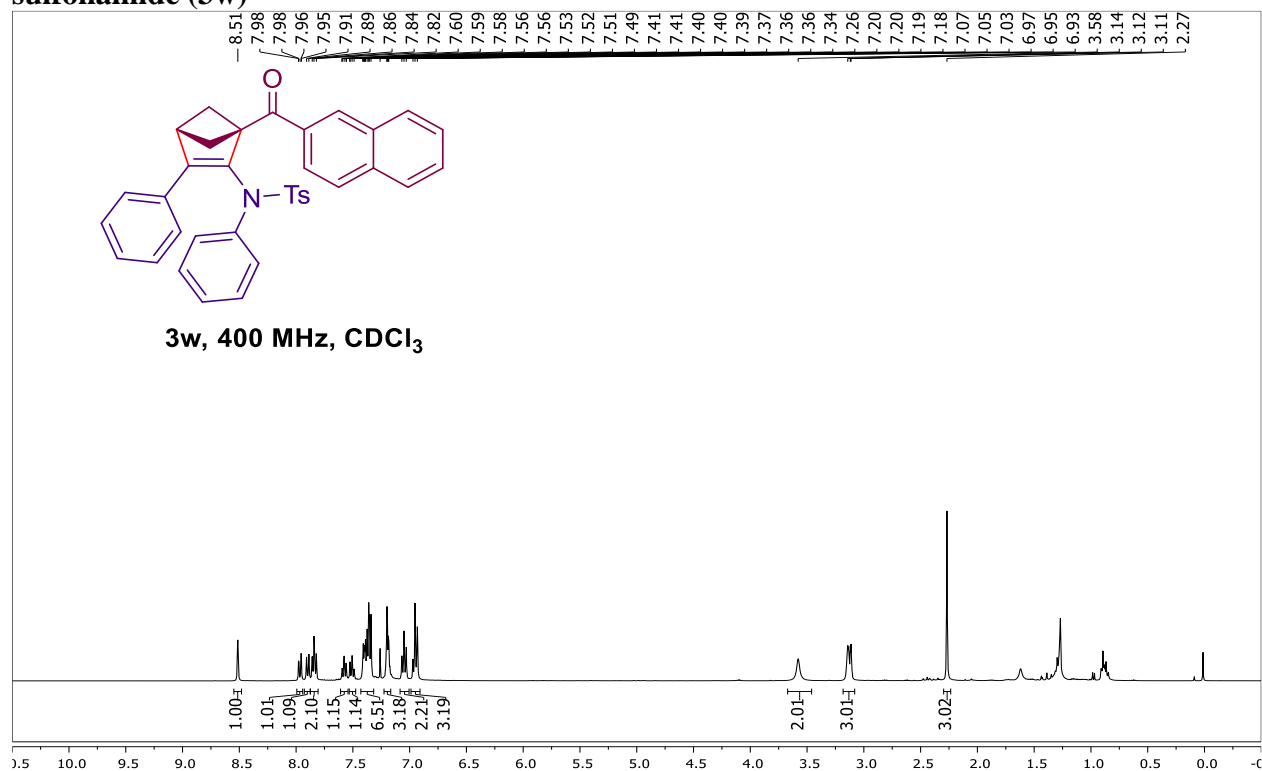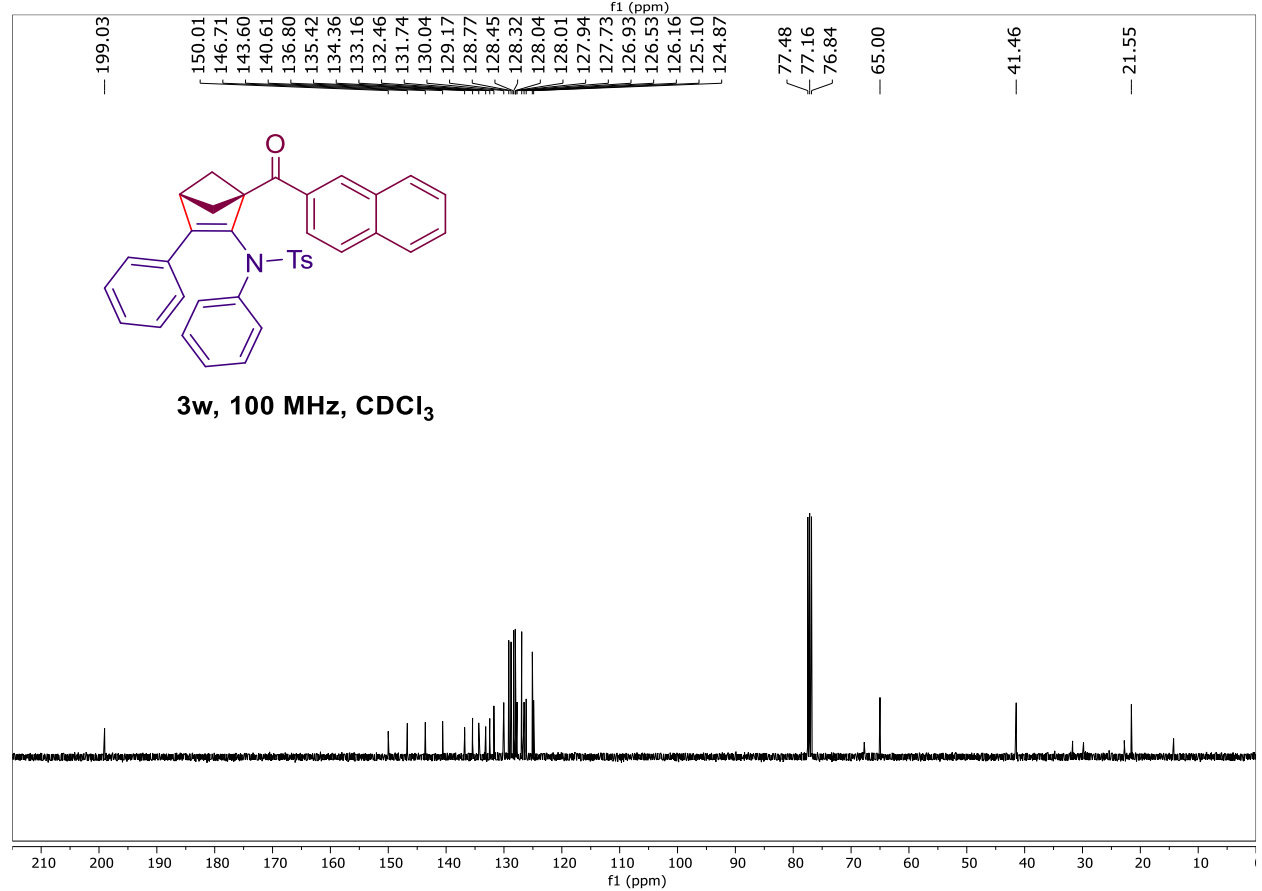

***N*-1-(2-Naphthoyl)-3-phenylbicyclo[2.1.1]hex-2-en-2-yl)-*N*-(4-methoxyphenyl)-4-methylbenzenesulfonamide (3x)**

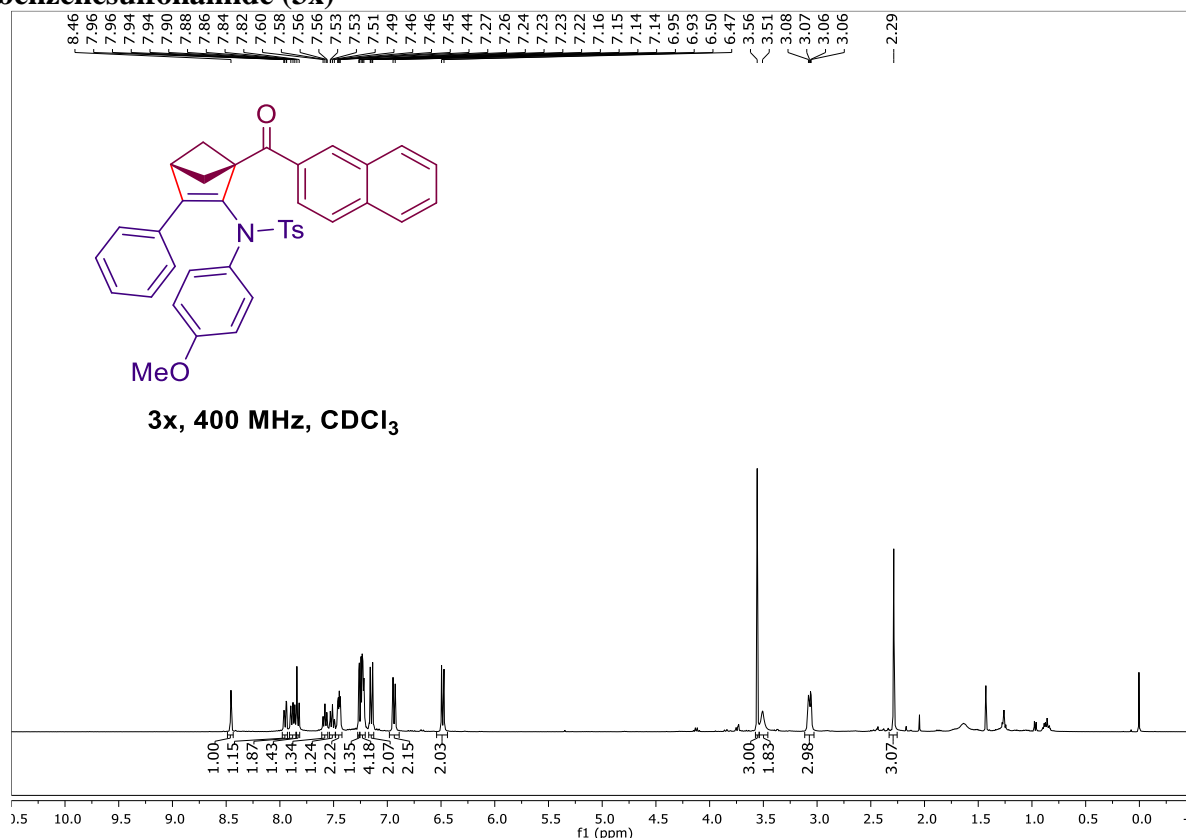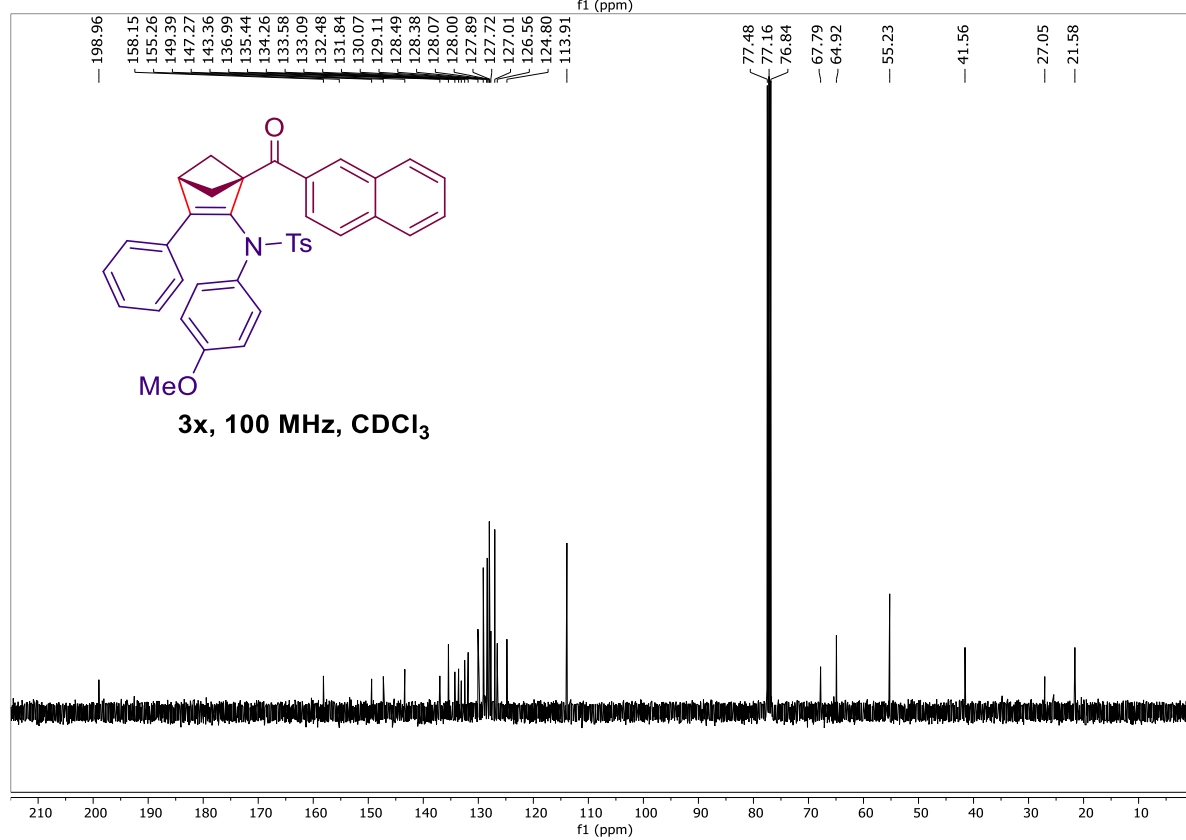

***N*-(1-(2-Naphthoyl)-3-phenylbicyclo[2.1.1]hex-2-en-2-yl)-4-methyl-*N*-(*p*-tolyl)benzene sulfonamide (**3y**)**

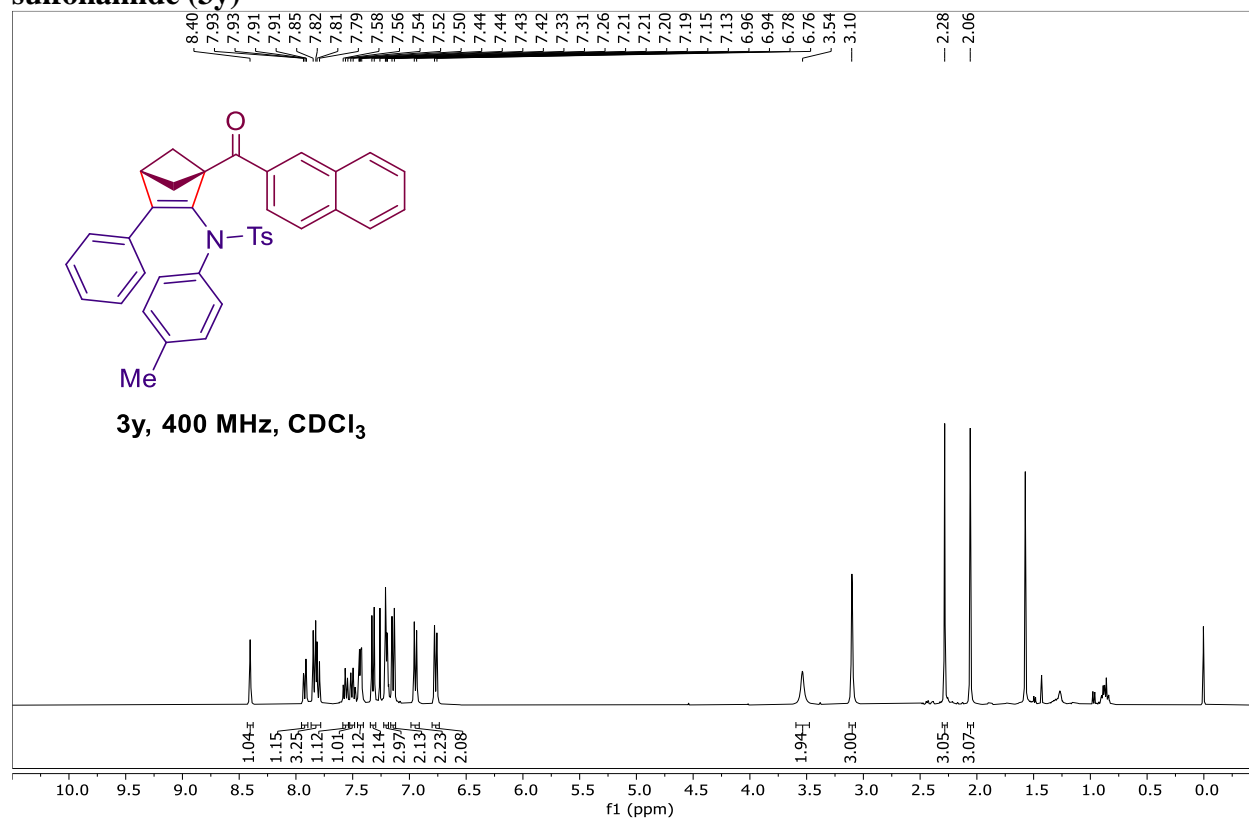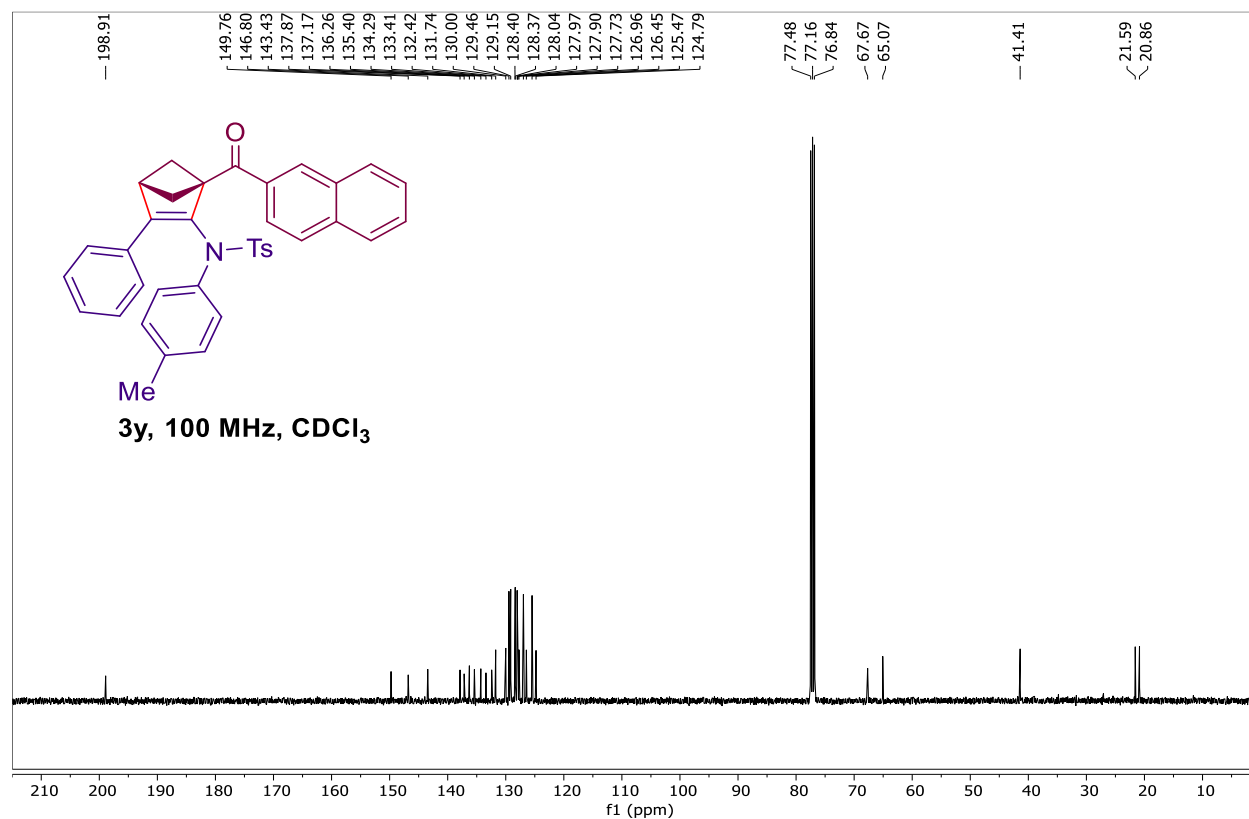

***N*-(1-(4-Methoxybenzoyl)-3-phenylbicyclo[2.1.1]hex-2-en-2-yl)-*N*,4-dimethyl benzene sulfonamide (**3z**)**

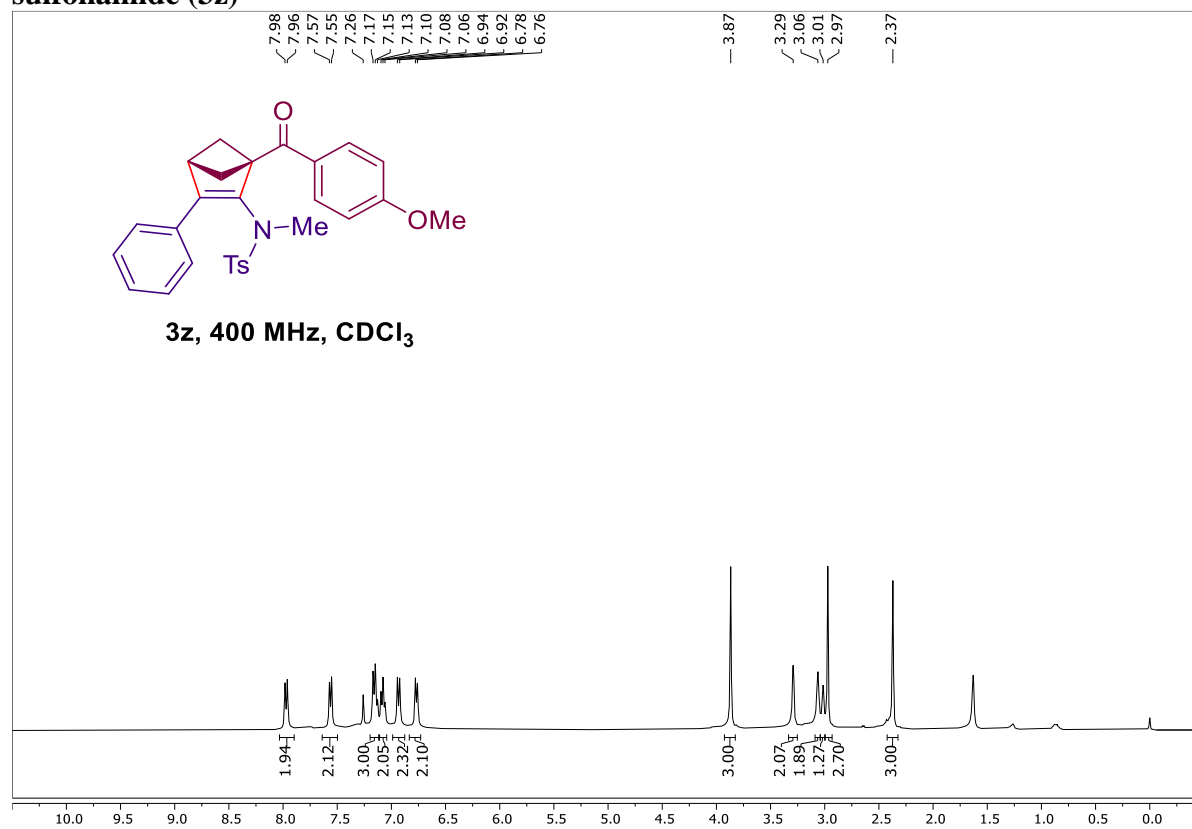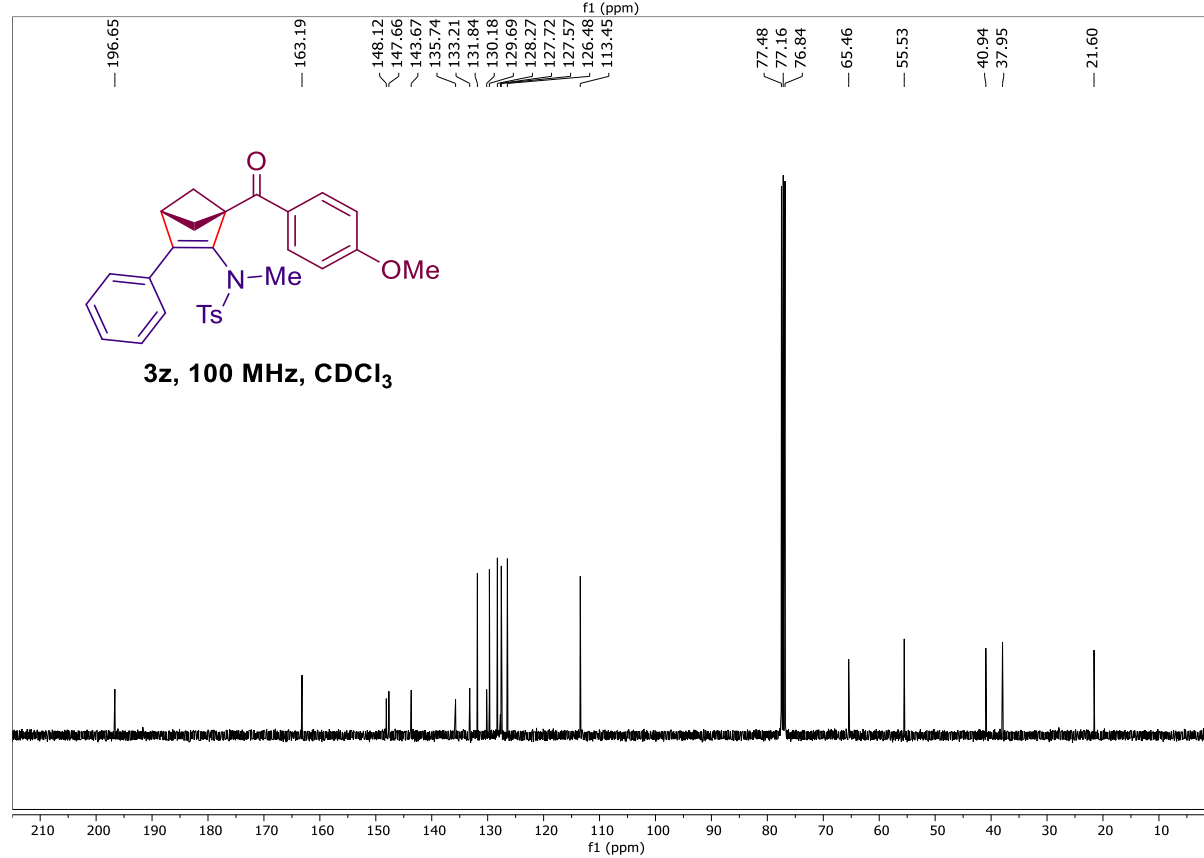



***N*,4-Dimethyl-*N*-(1-(4-methylbenzoyl)-3-phenylbicyclo[2.1.1]hex-2-en-2-yl)benzene sulfonamide (3aa)**

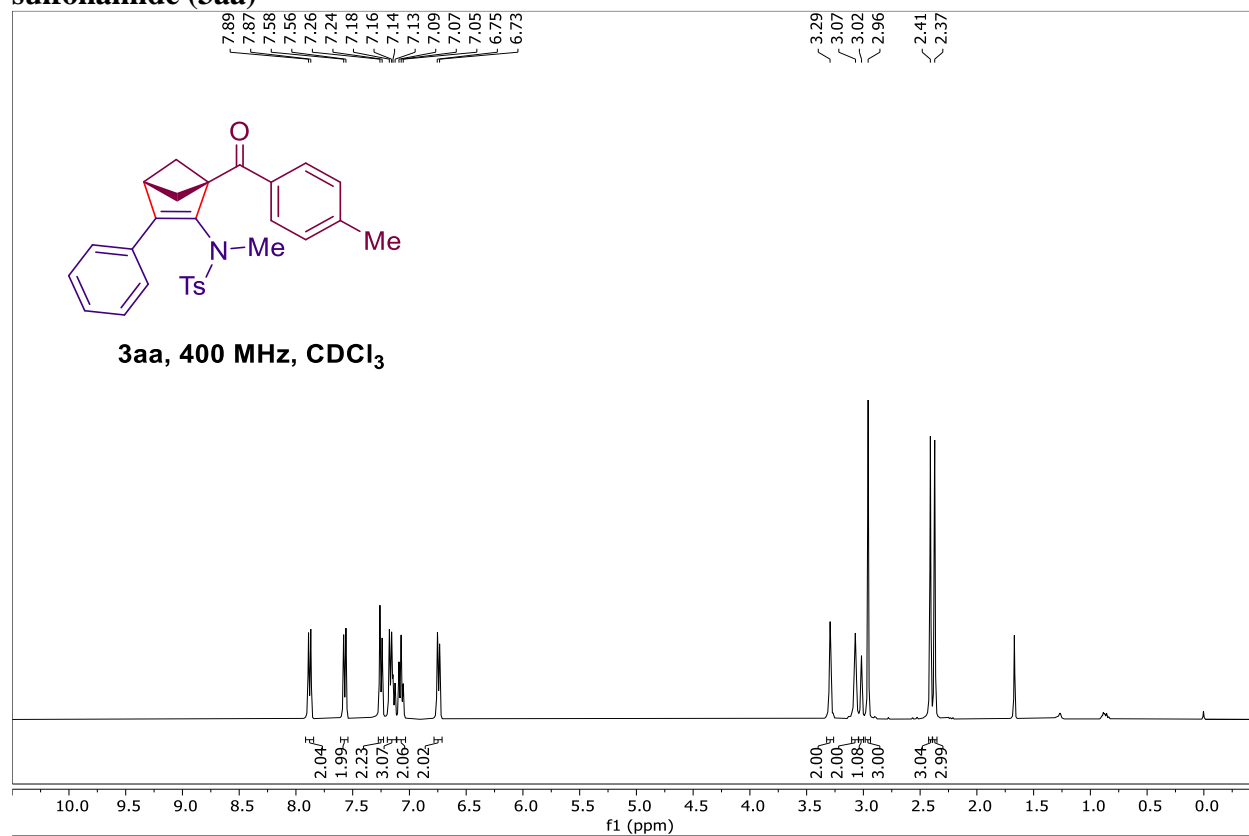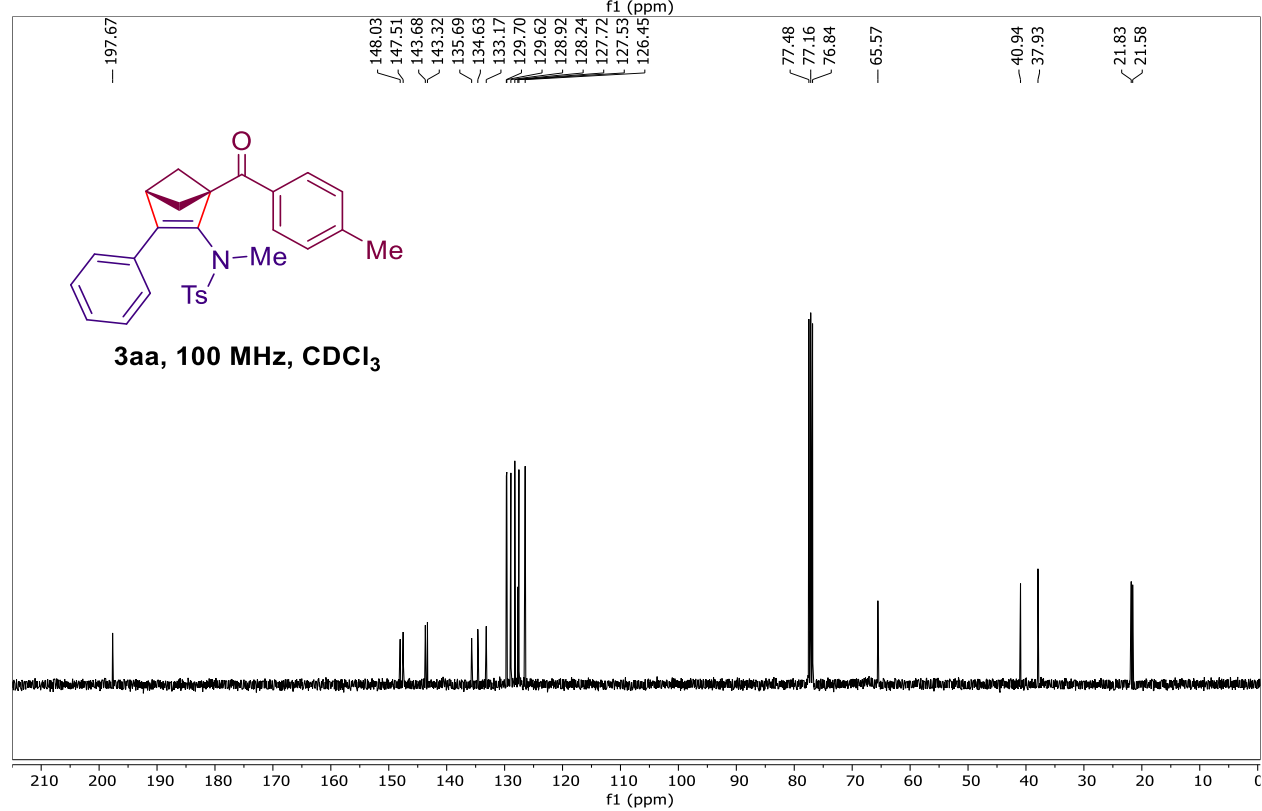

***N*-(1-(4-(*tert*-Butyl)benzoyl)-3-phenylbicyclo[2.1.1]hex-2-en-2-yl)-*N*,4-dimethylbenzene sulfonamide (**3ab**)**

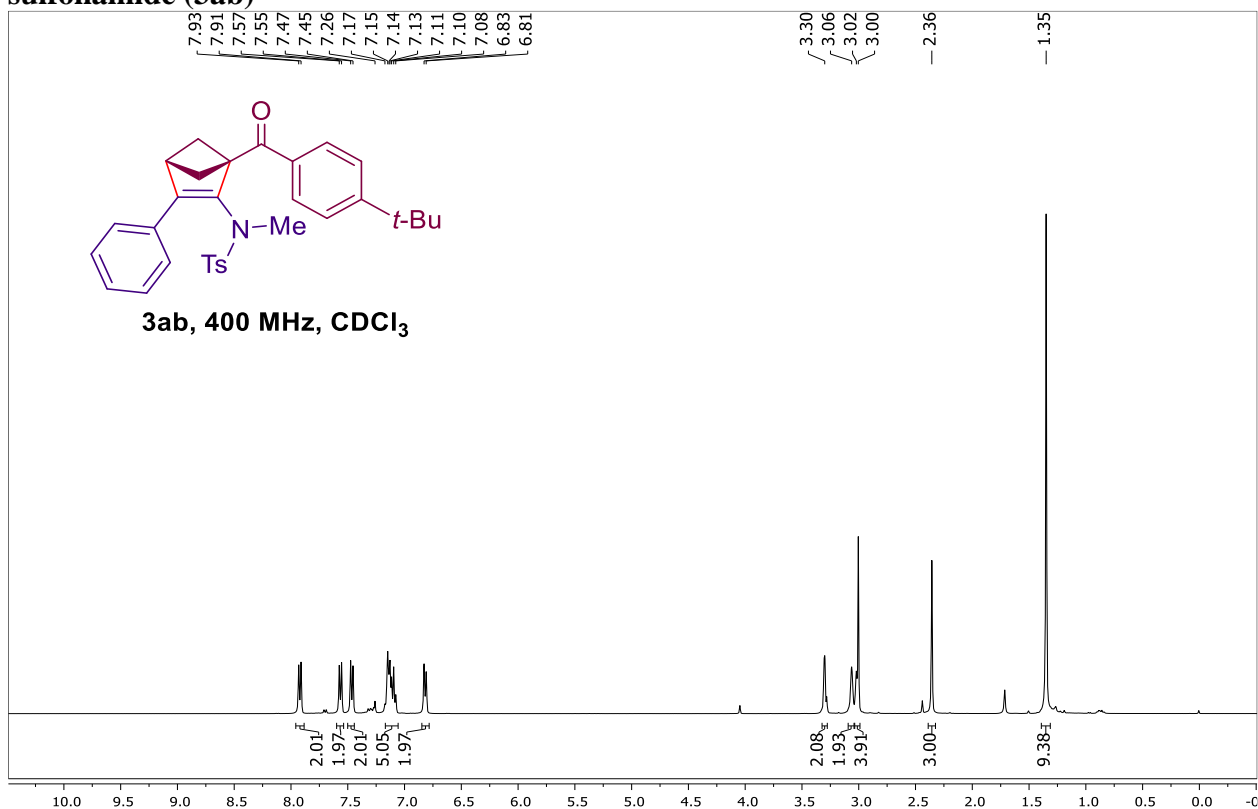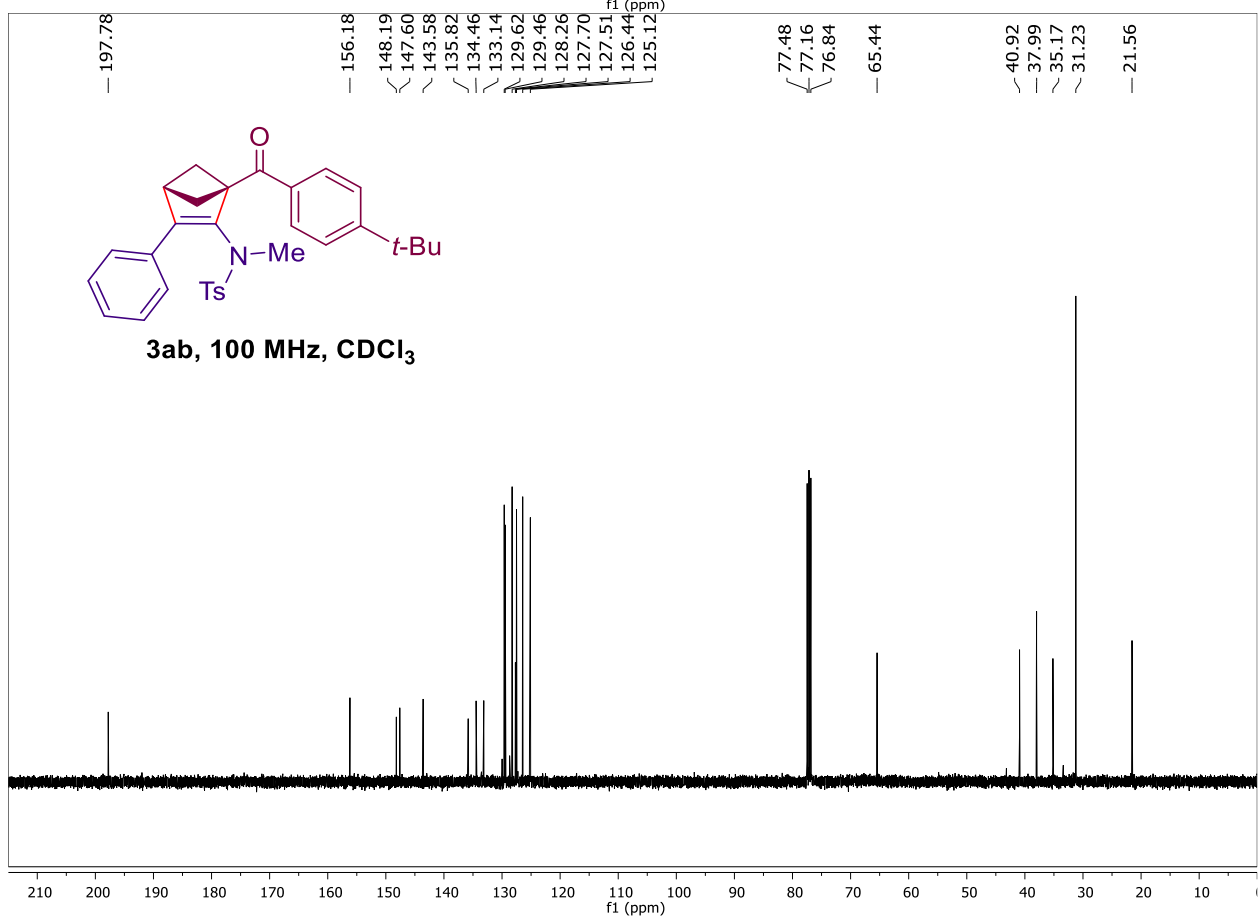

***N*-(1-Benzoyl-3-phenylbicyclo[2.1.1]hex-2-en-2-yl)-*N*,4-dimethylbenzenesulfonamide (3ac)**

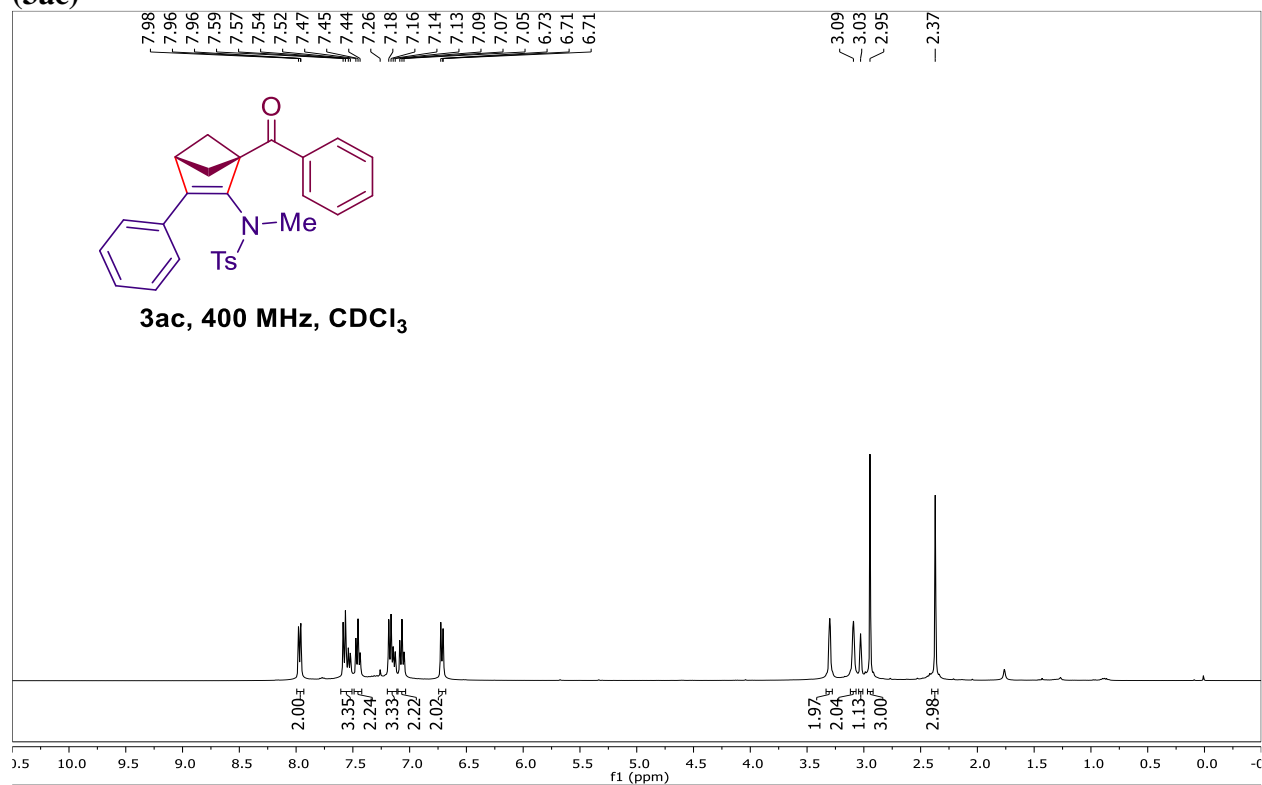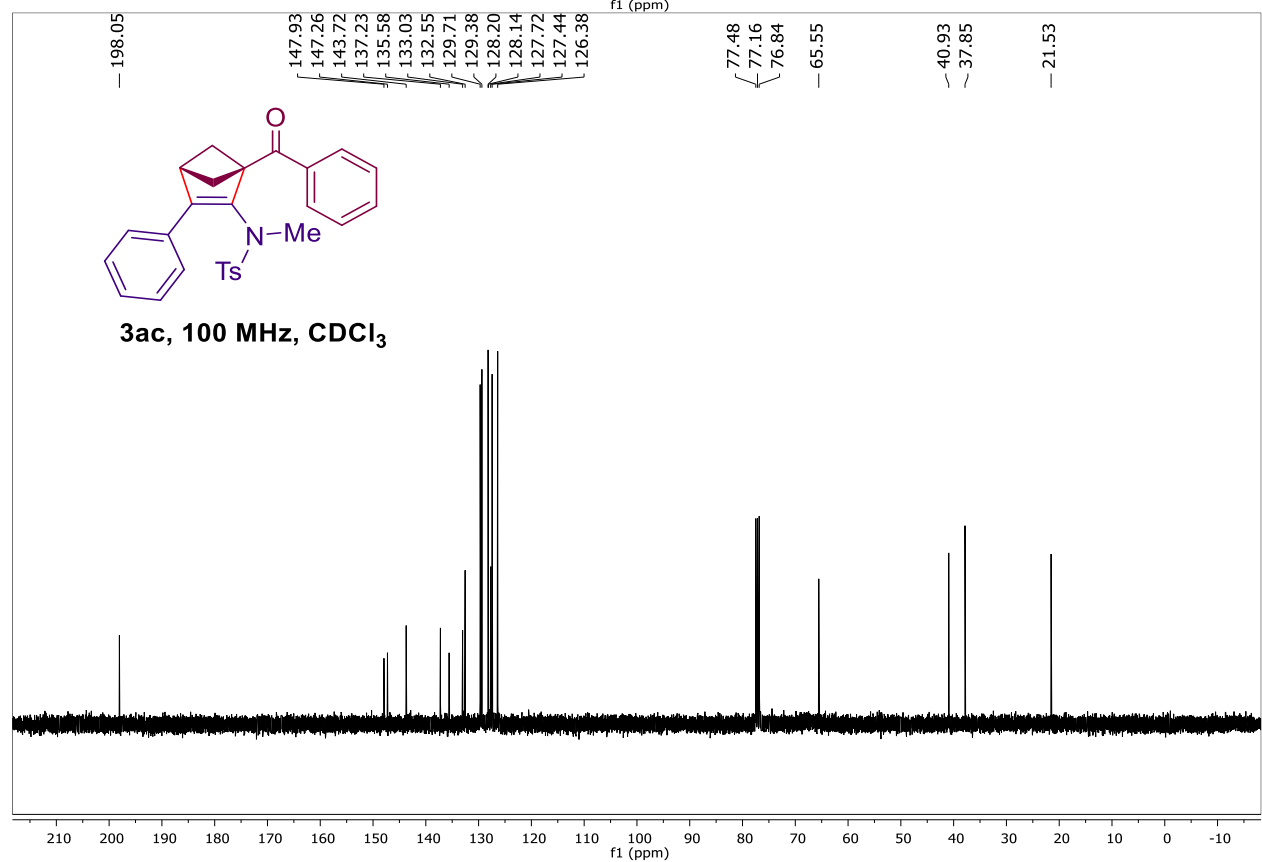

***N*-(1-(4-Bromobenzoyl)-3-phenylbicyclo[2.1.1]hex-2-en-2-yl)-*N*,4-dimethylbenzene sulfonamide (3ad)**

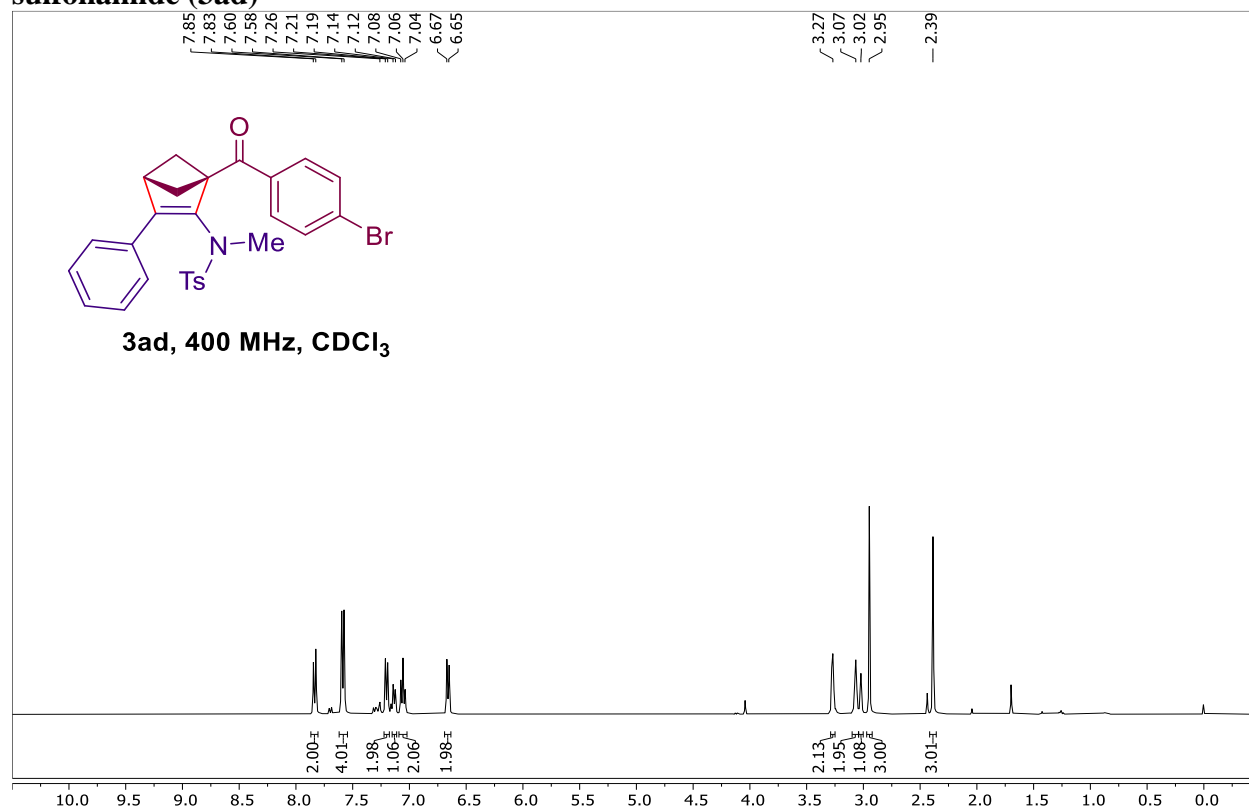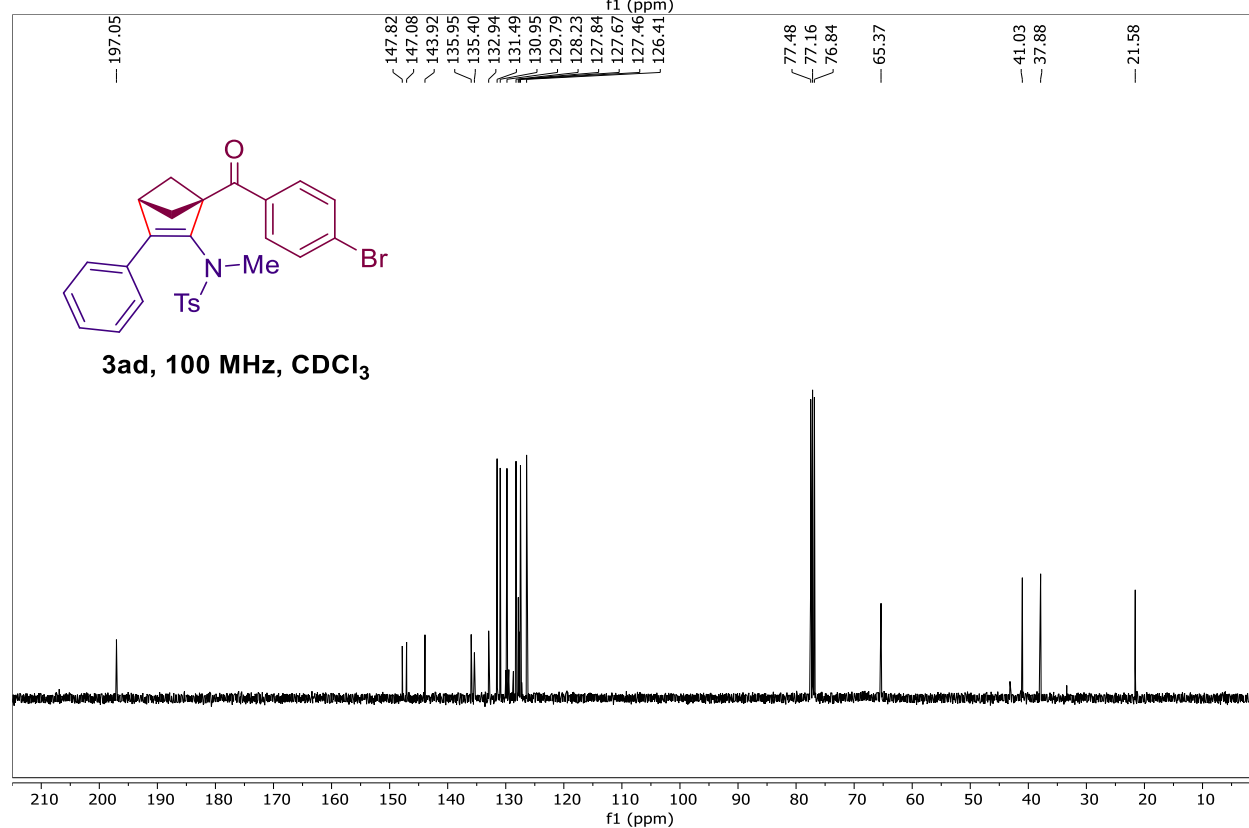

***N*-(1-(4-Chlorobenzoyl)-3-phenylbicyclo[2.1.1]hex-2-en-2-yl)-*N*,4-dimethylbenzene sulfonamide (3ae)**

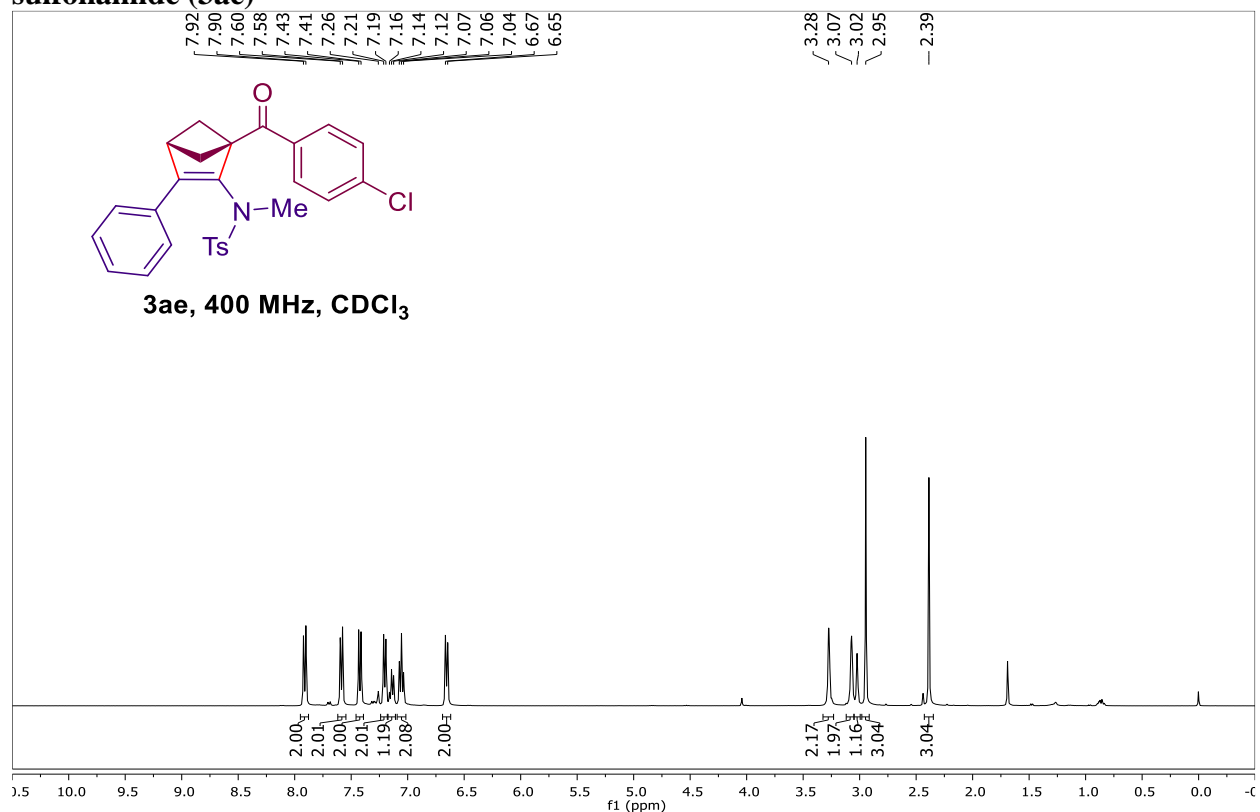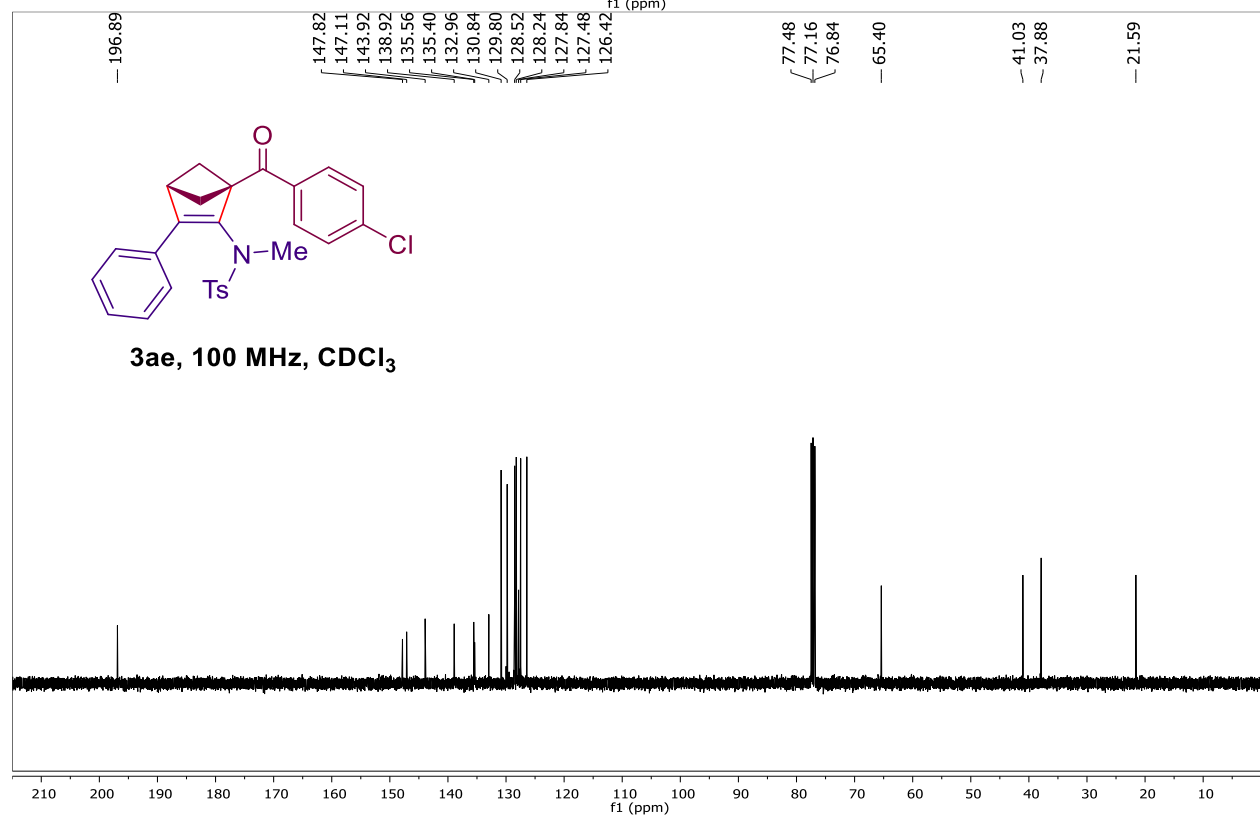

***N*-(1-(4-Fluorobenzoyl)-3-phenylbicyclo[2.1.1]hex-2-en-2-yl)-*N*,4-dimethylbenzene sulfonamide (3af)**

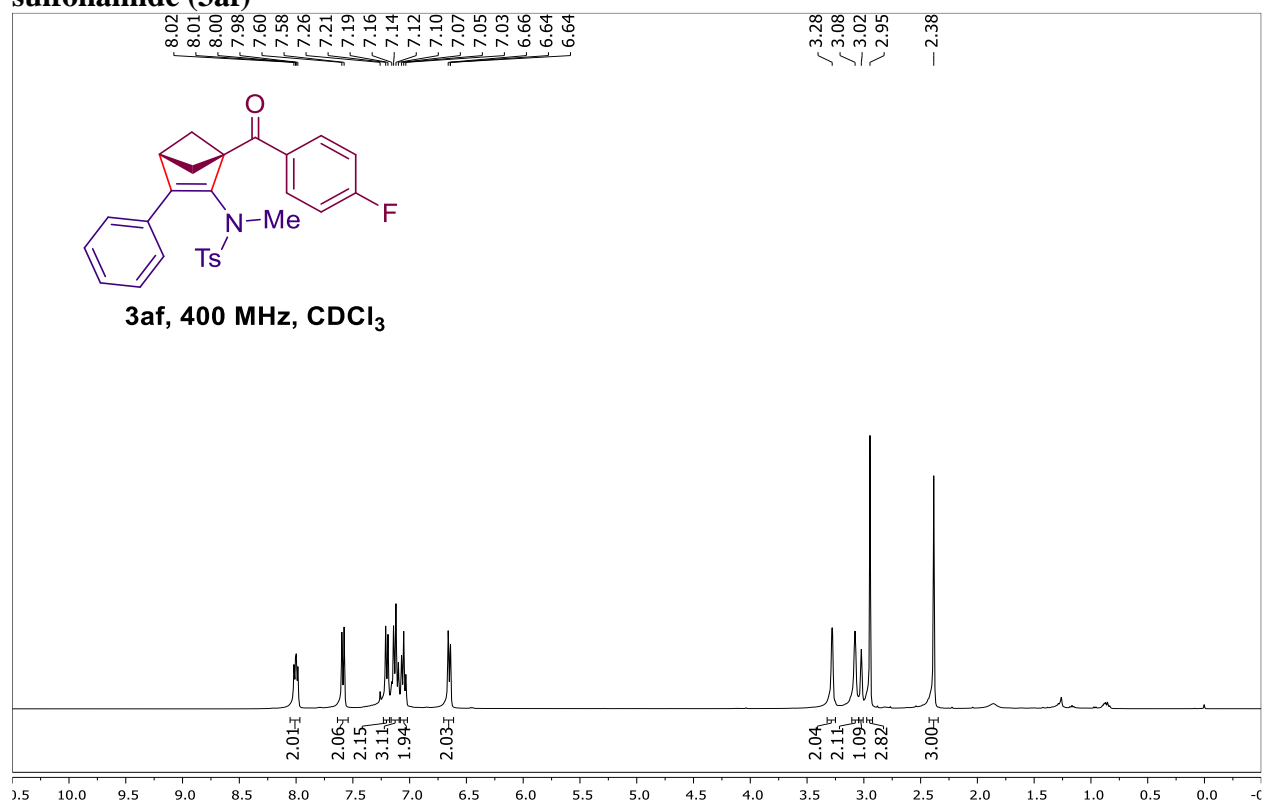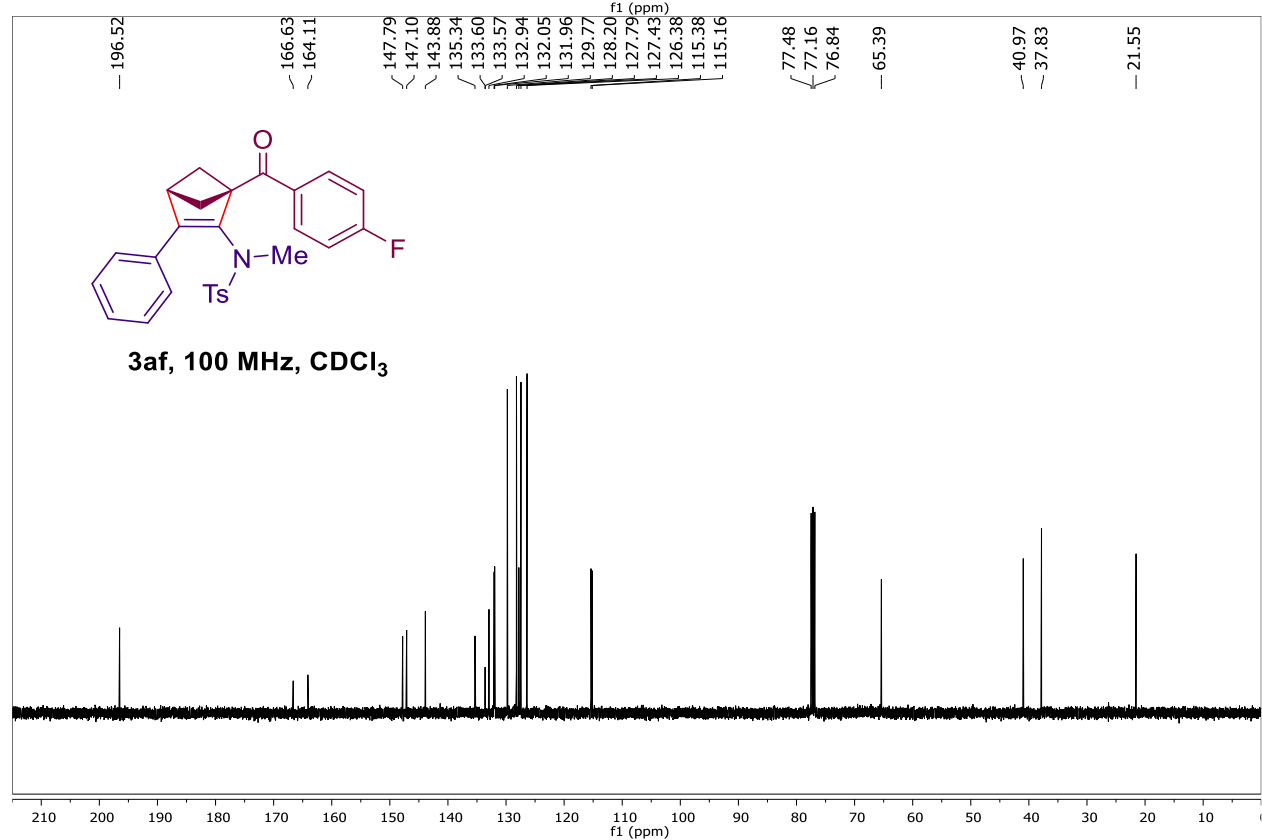

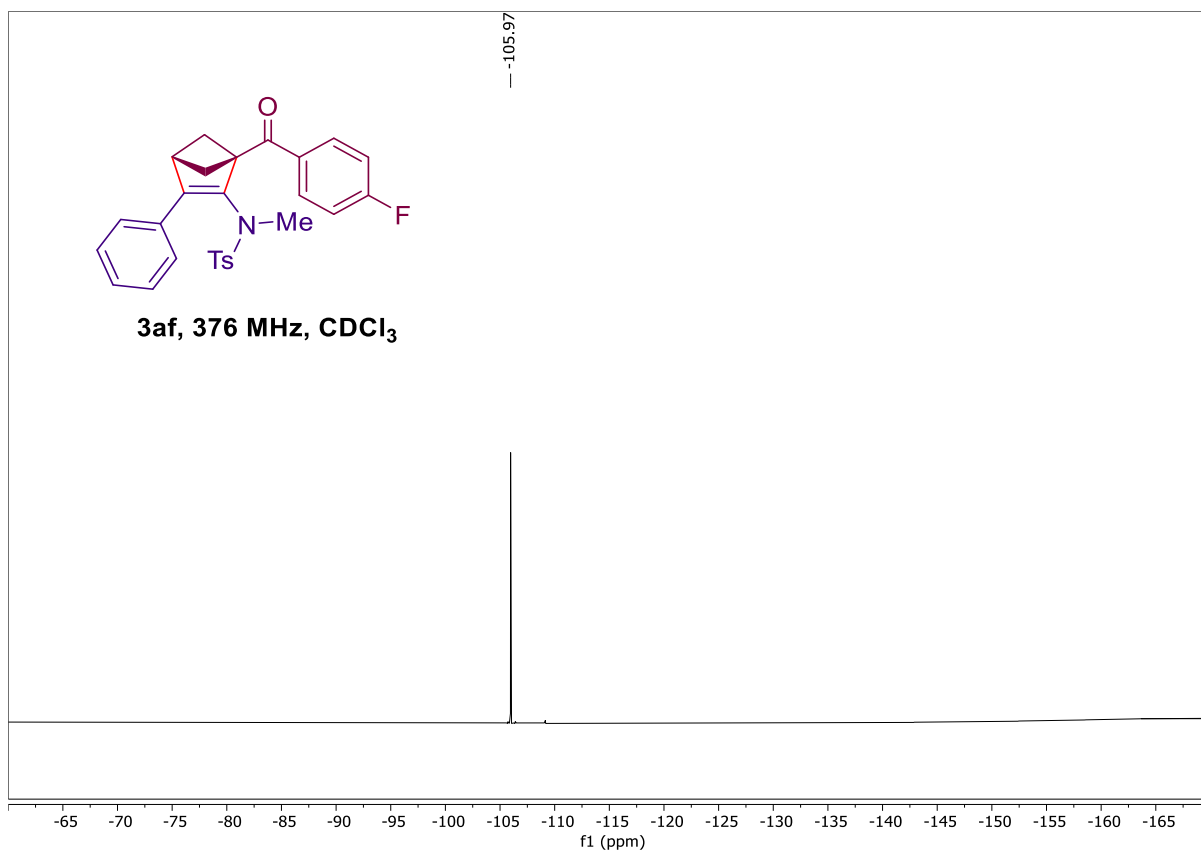

***N*-(1-(3-Methoxybenzoyl)-3-phenylbicyclo[2.1.1]hex-2-en-2-yl)-*N*,4-dimethylbenzene sulfonamide (3ag)**

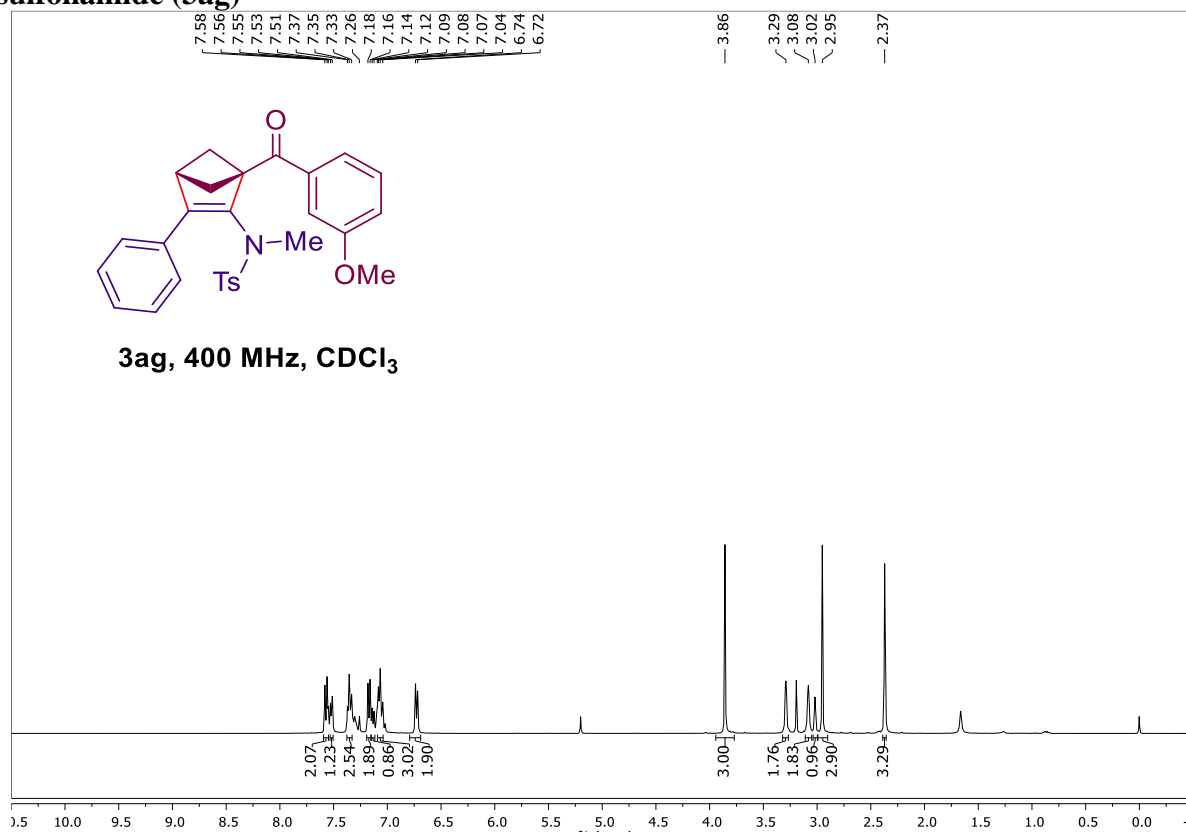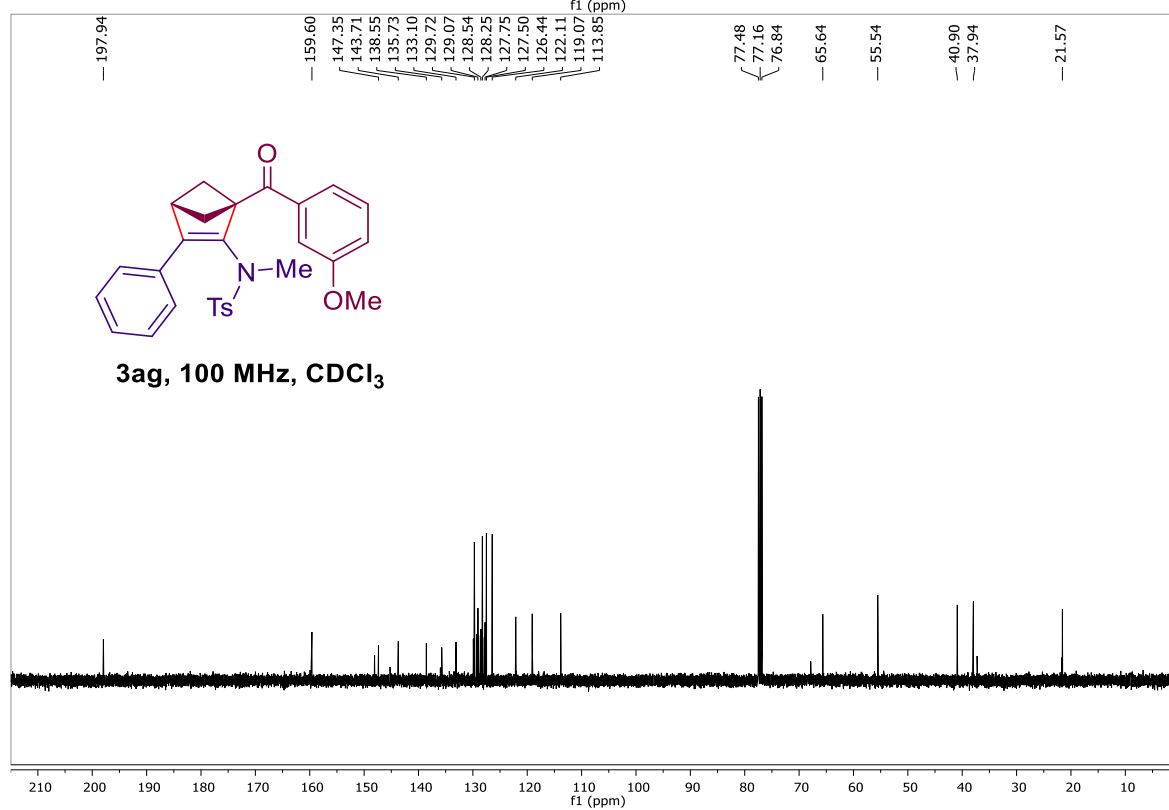



***N*,4-Dimethyl-*N*-(1-(3-methylbenzoyl)-3-phenylbicyclo[2.1.1]hex-2-en-2-yl)benzene sulfonamide (3ah)**

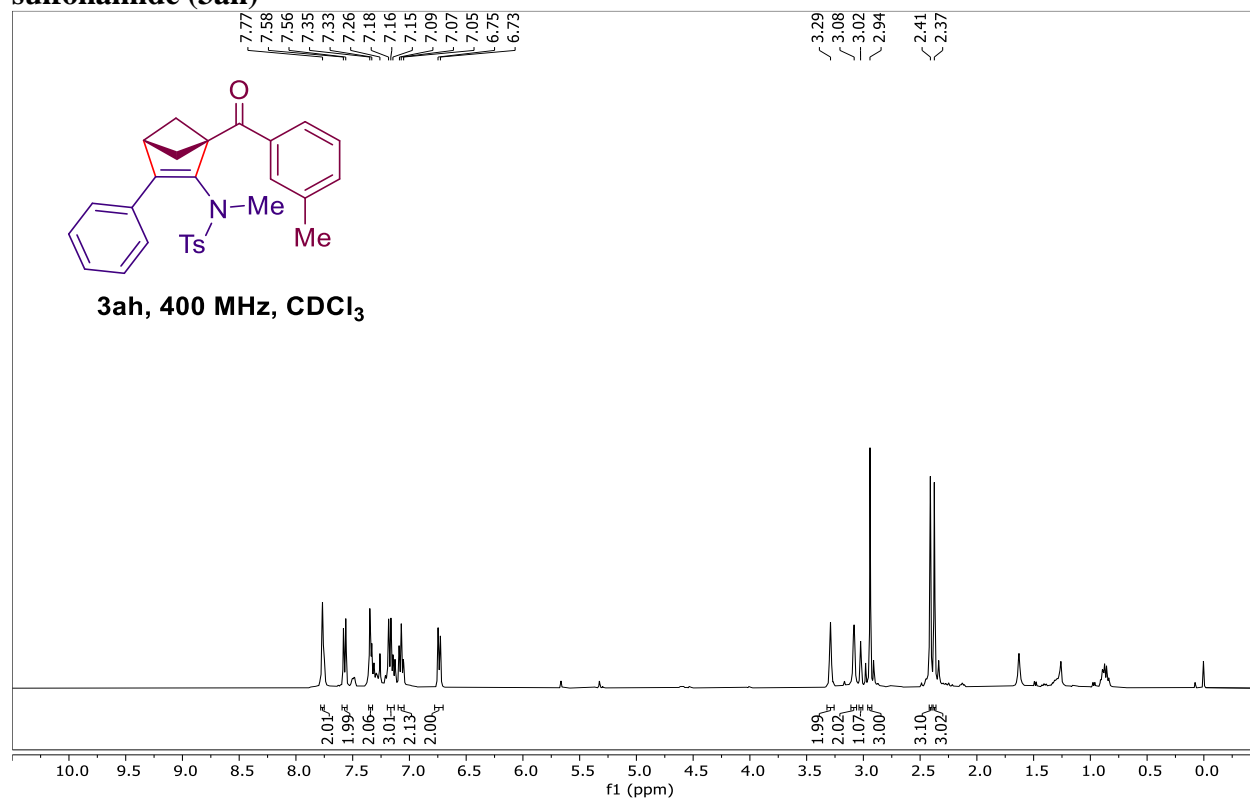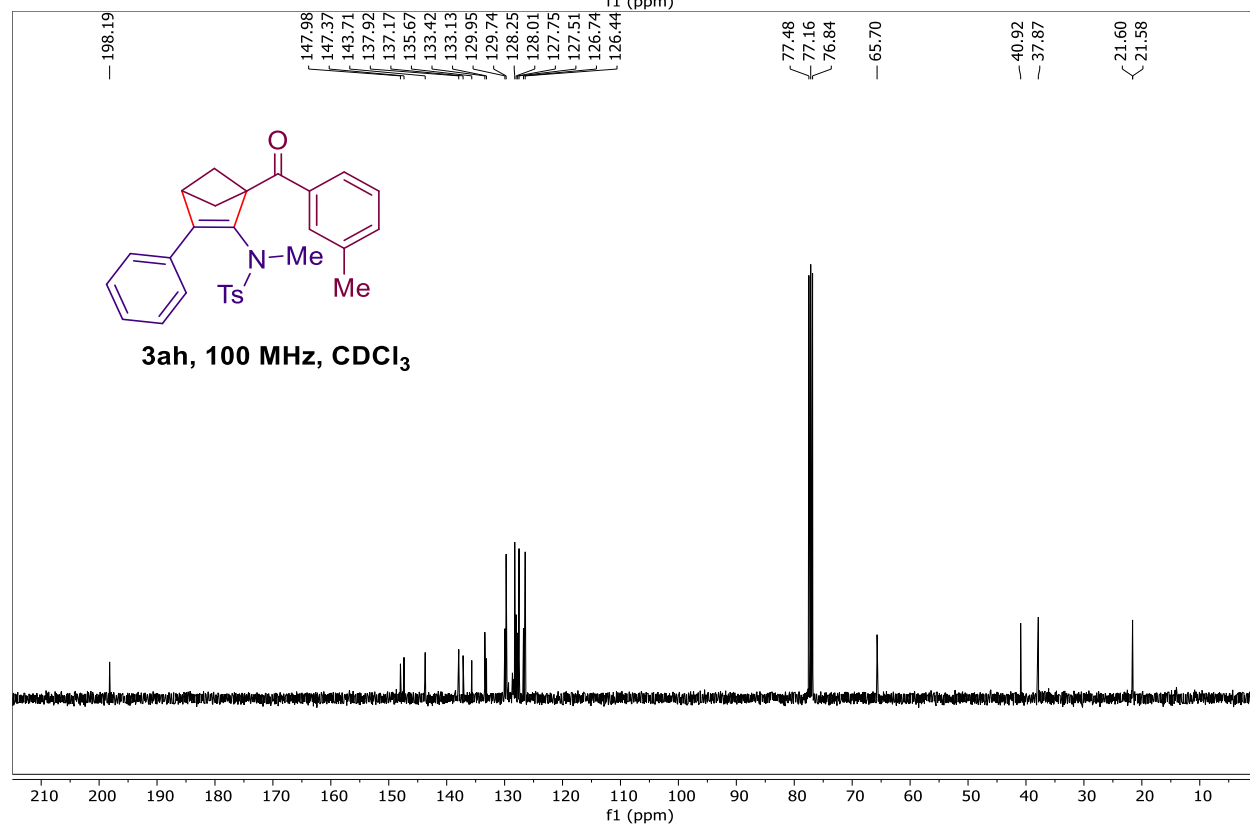

***N*-(1-(3-Fluorobenzoyl)-3-phenylbicyclo[2.1.1]hex-2-en-2-yl)-*N*,4-dimethylbenzene sulfonamide (3ai)**

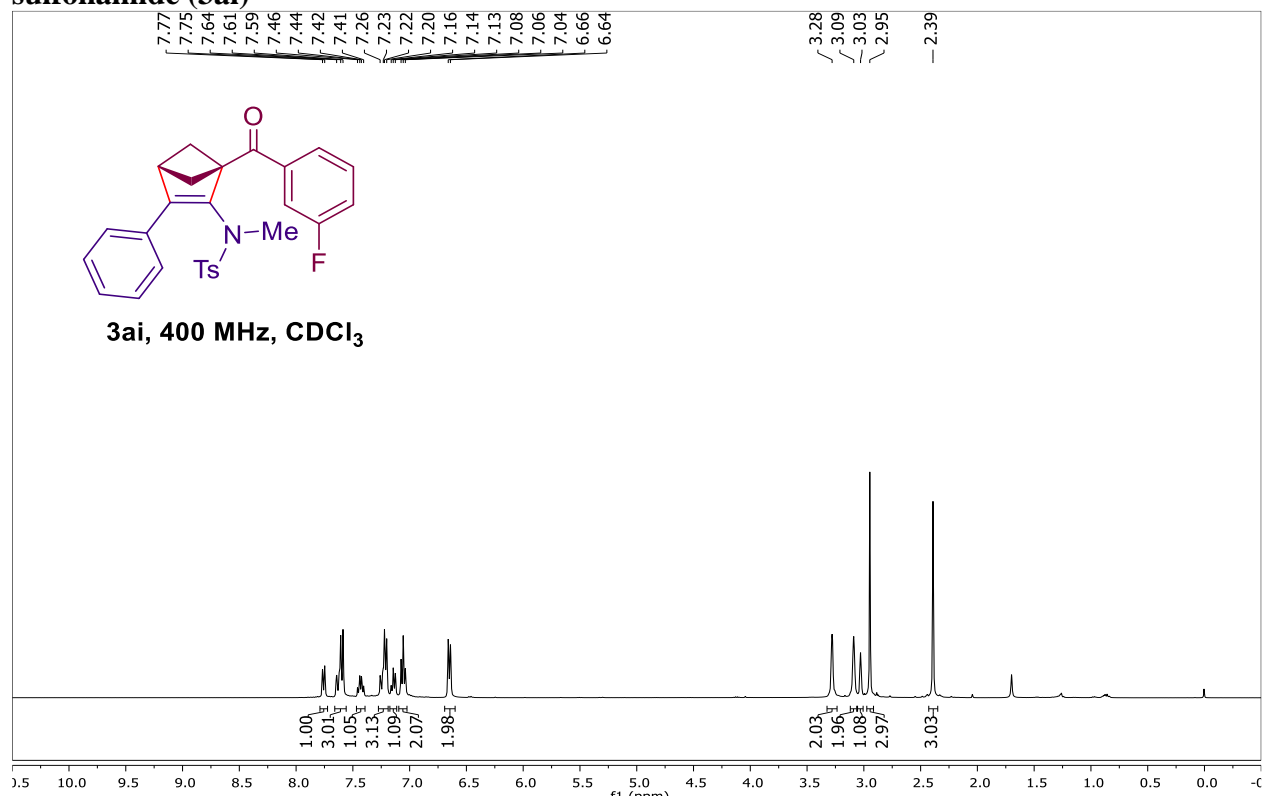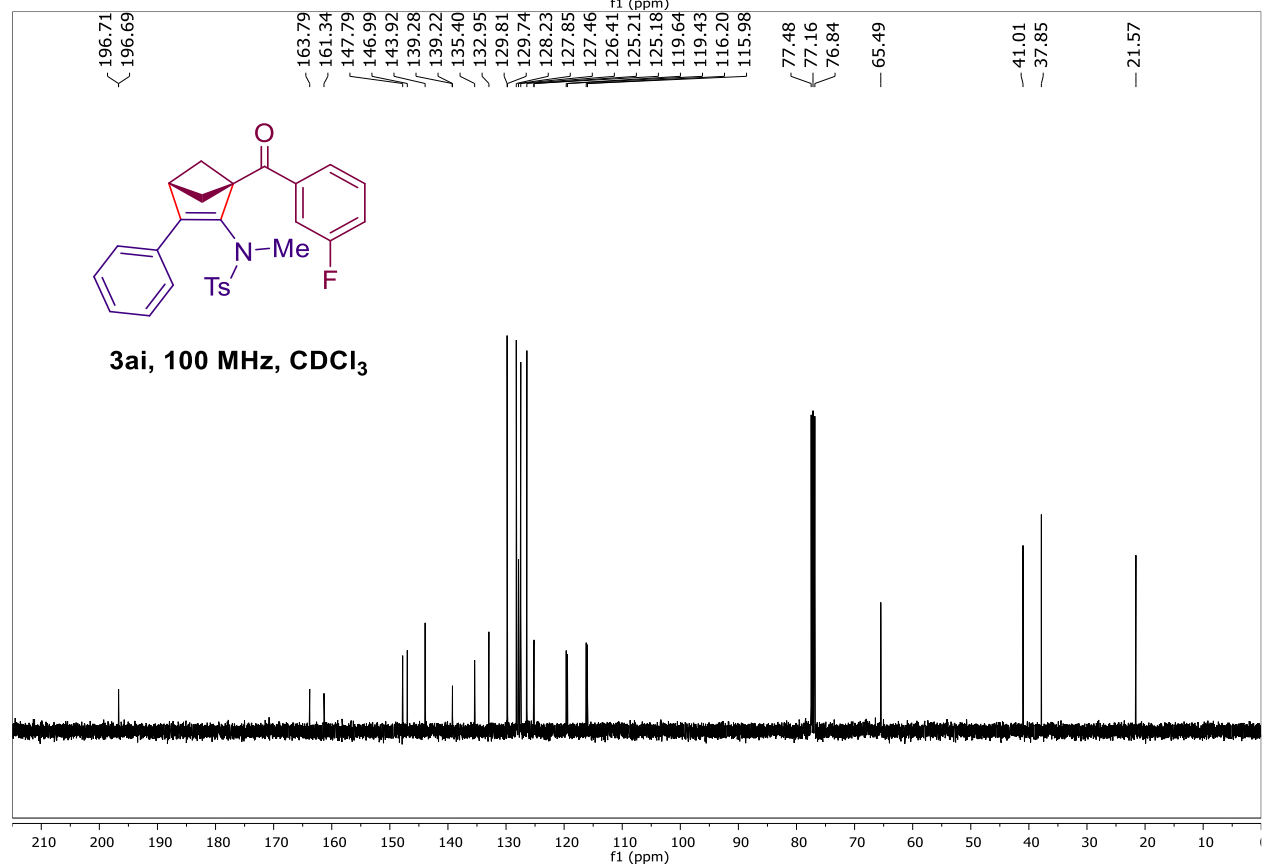

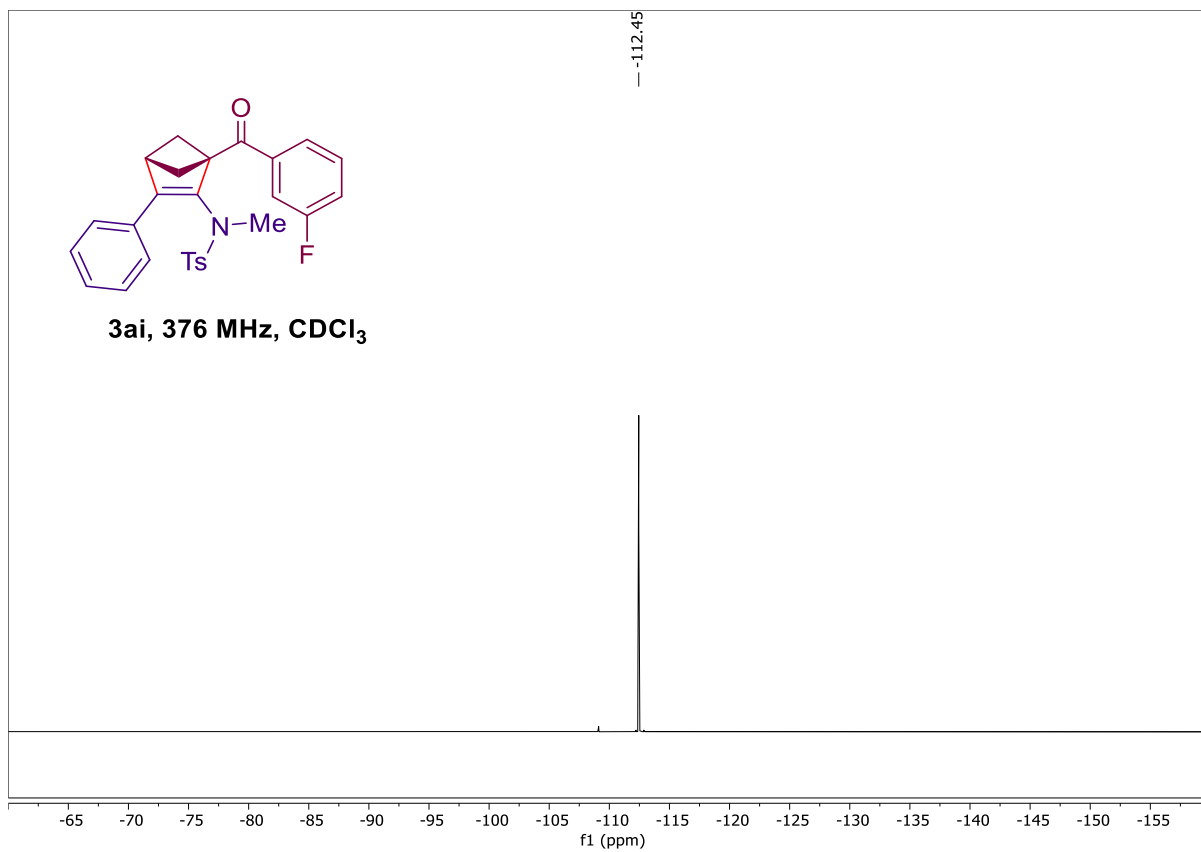

***N*-(1-(1-Naphthoyl)-3-phenylbicyclo[2.1.1]hex-2-en-2-yl)-*N*,4-dimethylbenzene sulfonamide (3aj)**

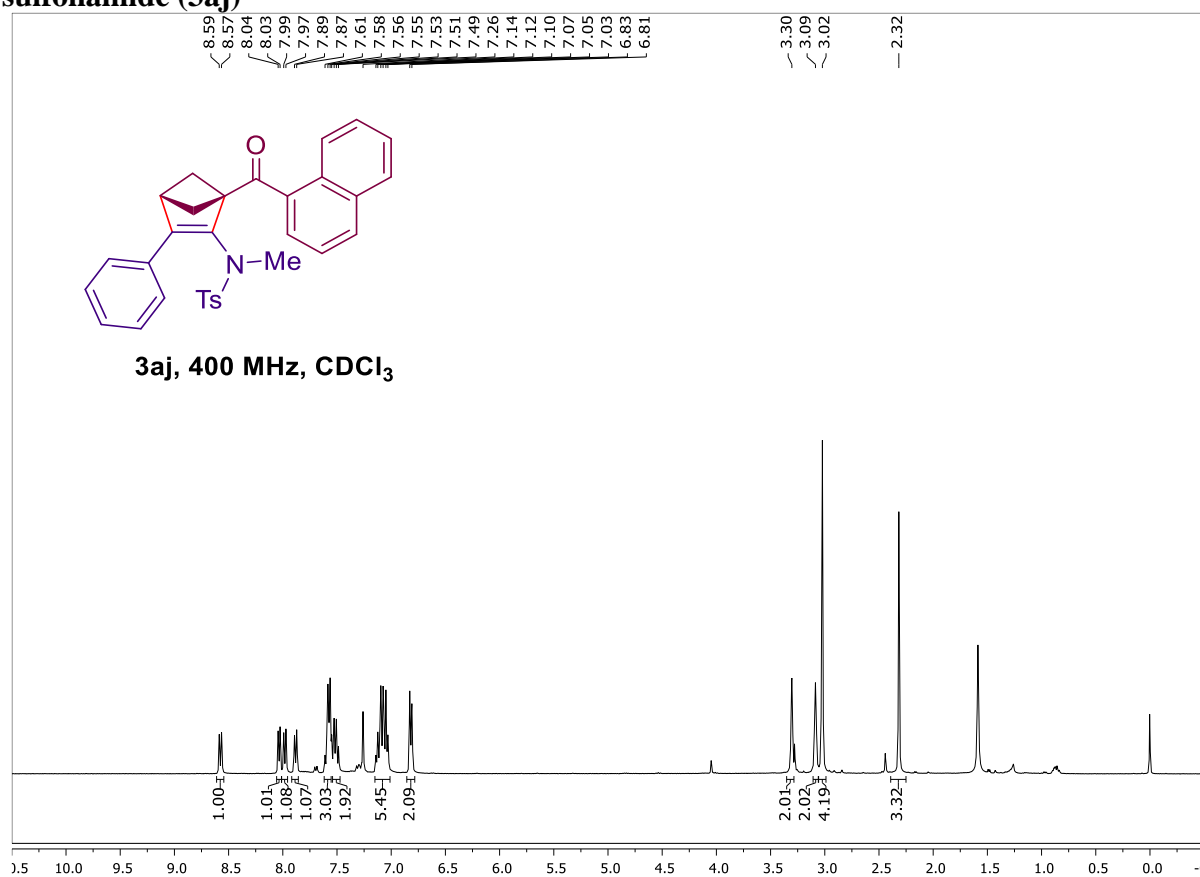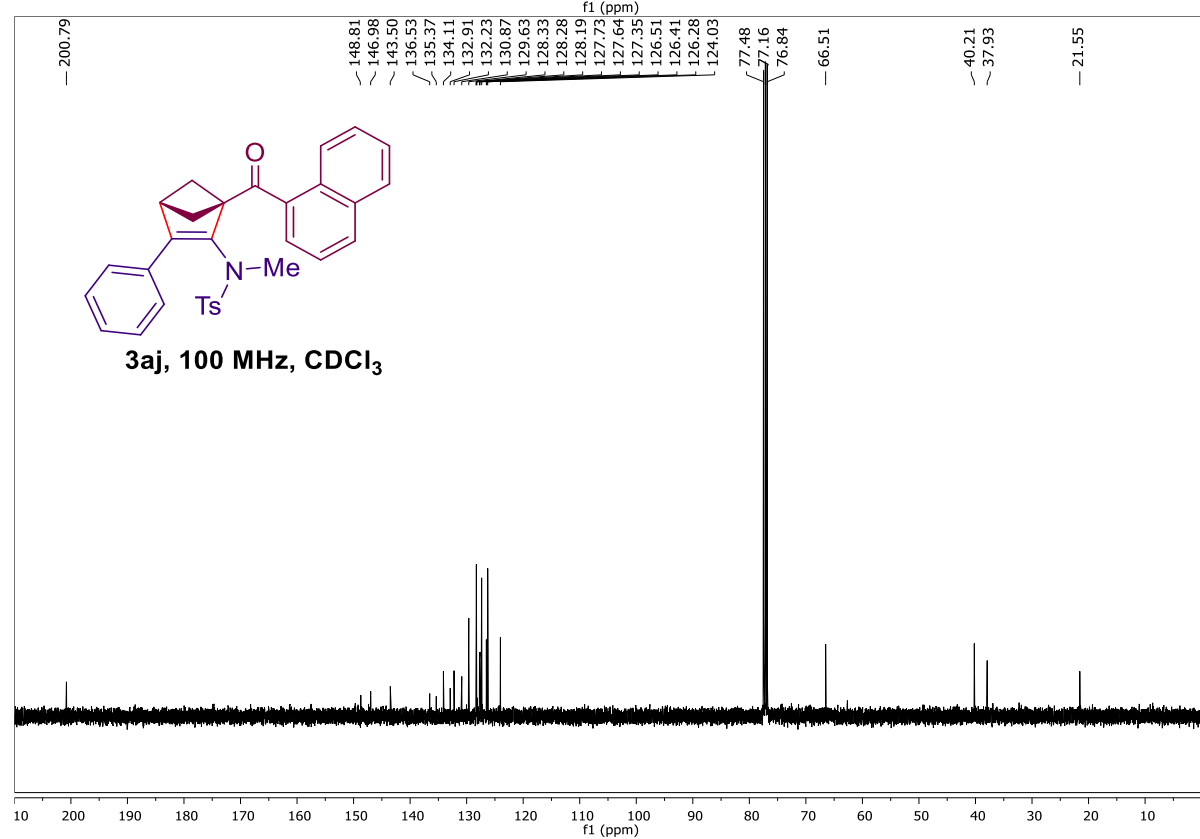

***N*-(1-(Benzo[*d*][1,3]dioxole-5-carbonyl)-3-phenylbicyclo[2.1.1]hex-2-en-2-yl)-*N*,4-dimethylbenzenesulfonamide (3ak)**

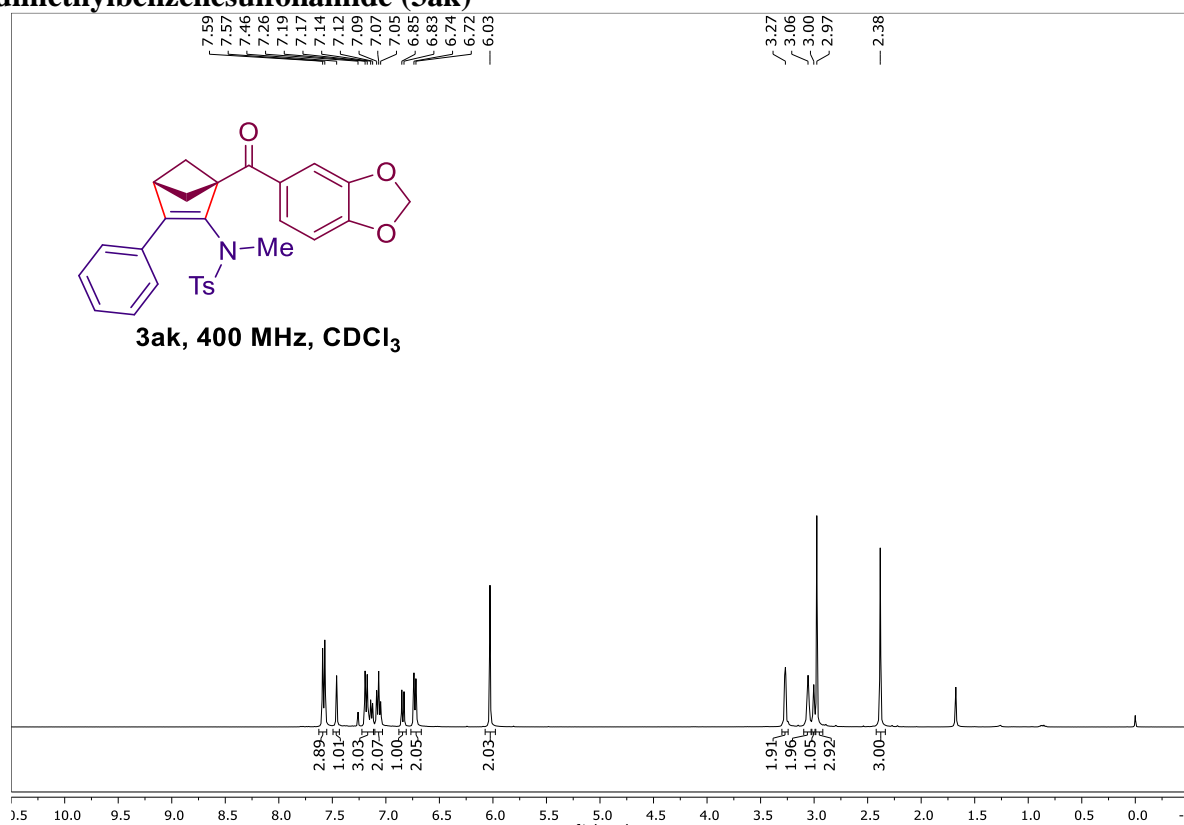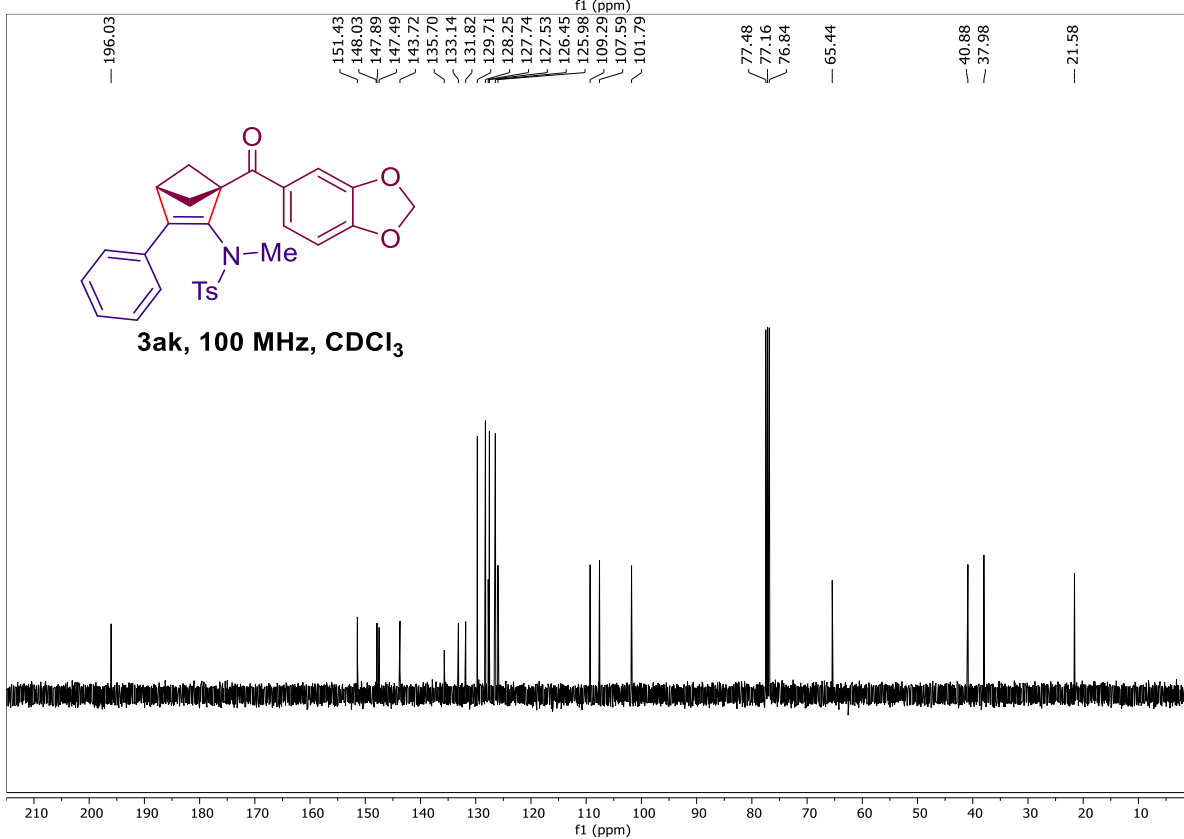

***N*,4-Dimethyl-*N*-(3-phenyl-1-(thiophene-2-carbonyl)bicyclo[2.1.1]hex-2-en-2-yl)benzene sulfonamide (3aI)**

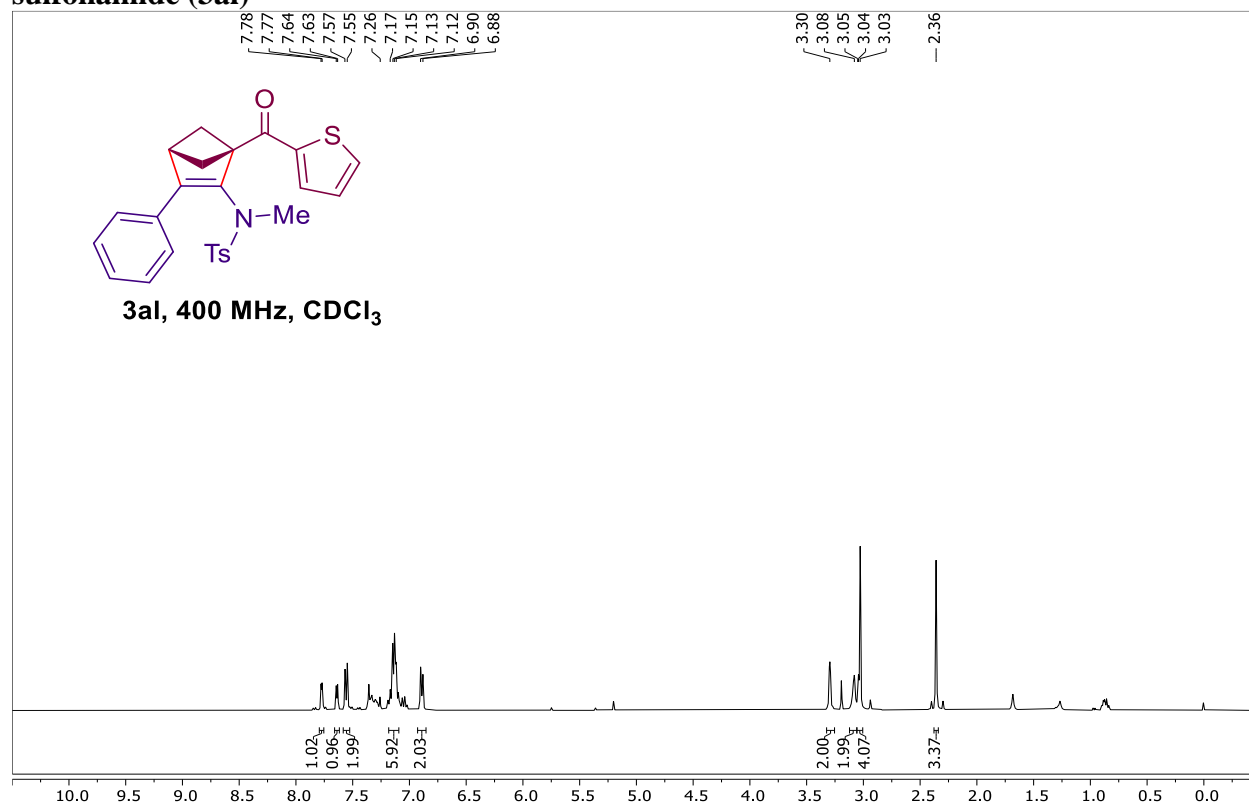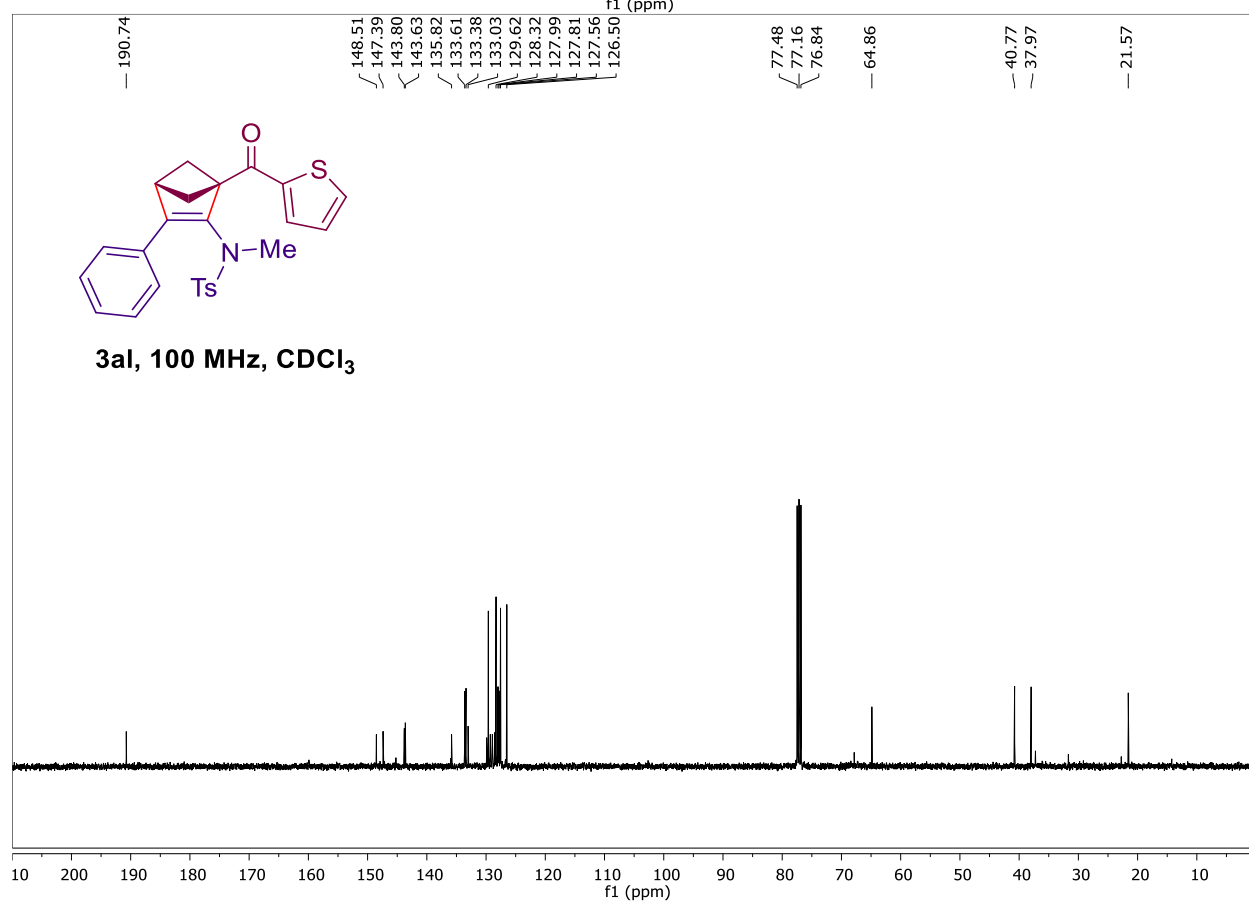

***N*-(1-(2-Naphthoyl)-3,4-diphenylbicyclo[2.1.1]hex-2-en-2-yl)-*N*,4-dimethylbenzene sulfonamide (3am)**

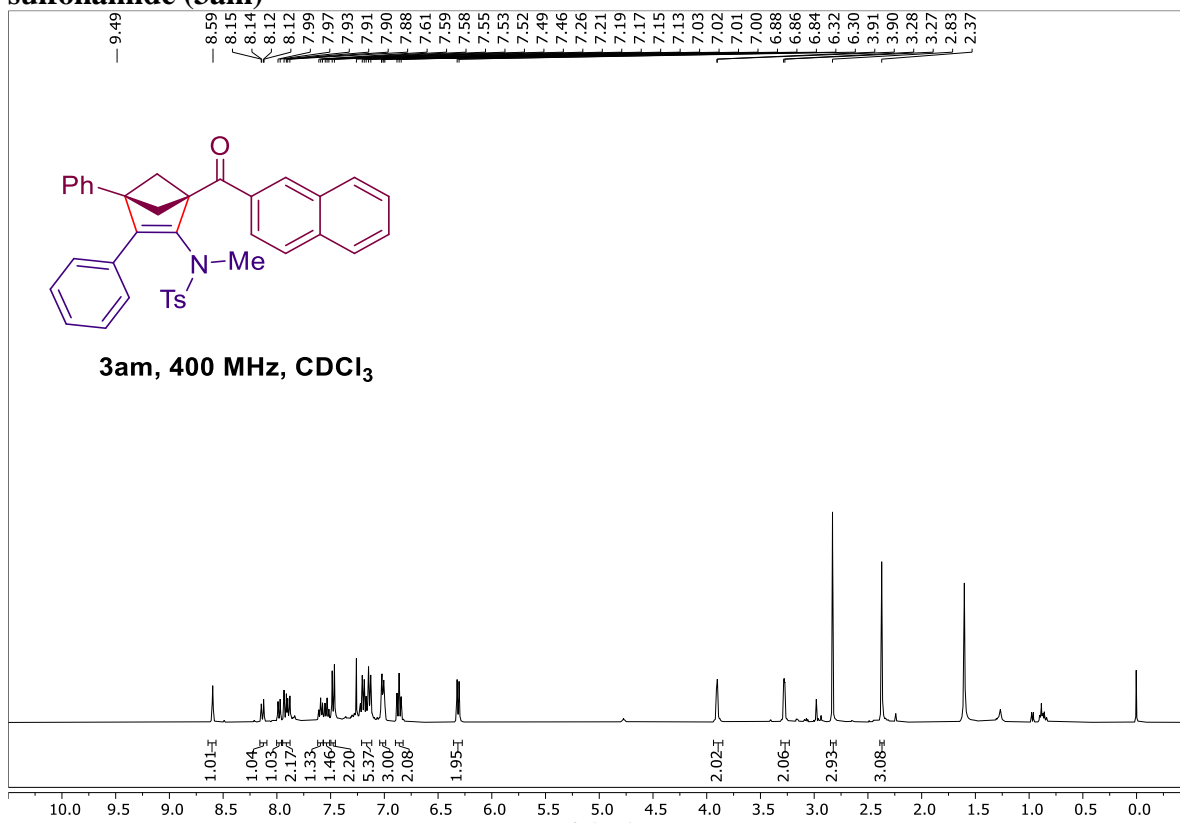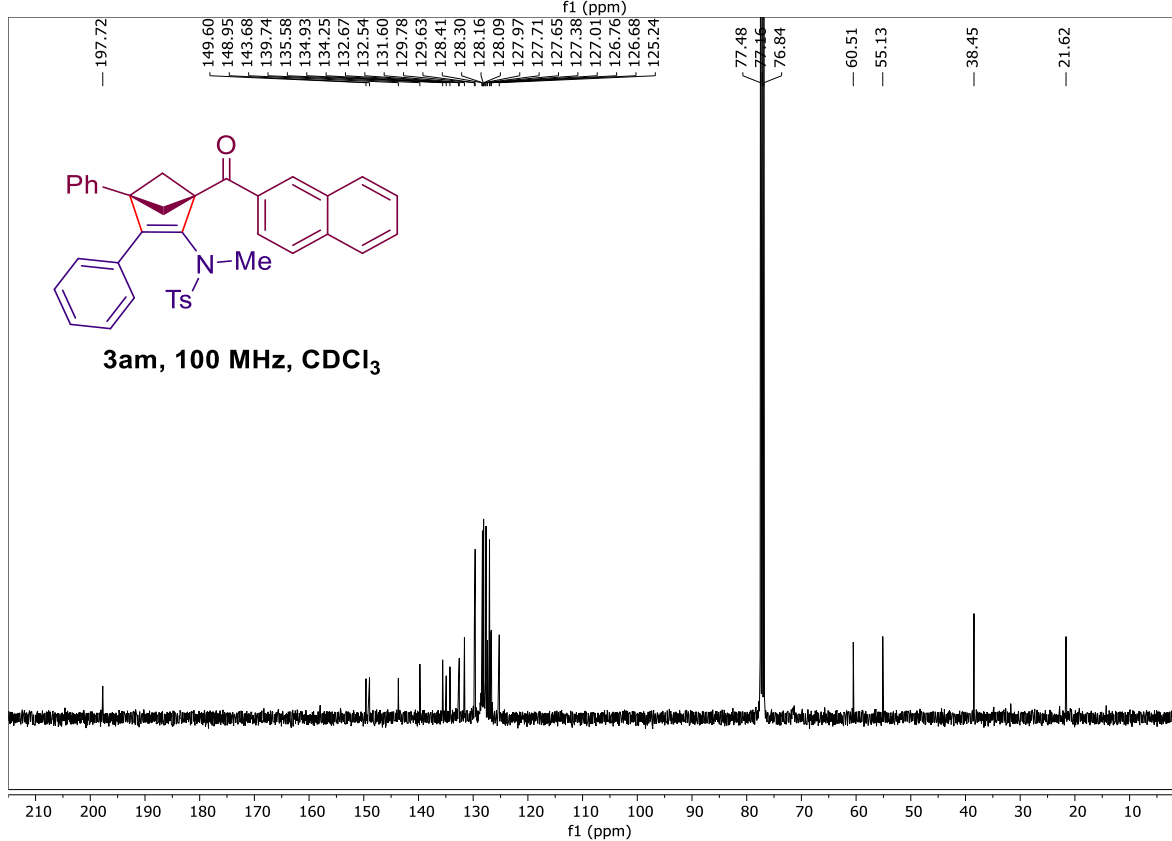

***N*-(3,4-Diphenyl-1-(thiophene-2-carbonyl)bicyclo[2.1.1]hex-2-en-2-yl)-*N*,4-dimethylbenzenesulfonamide (3an)**

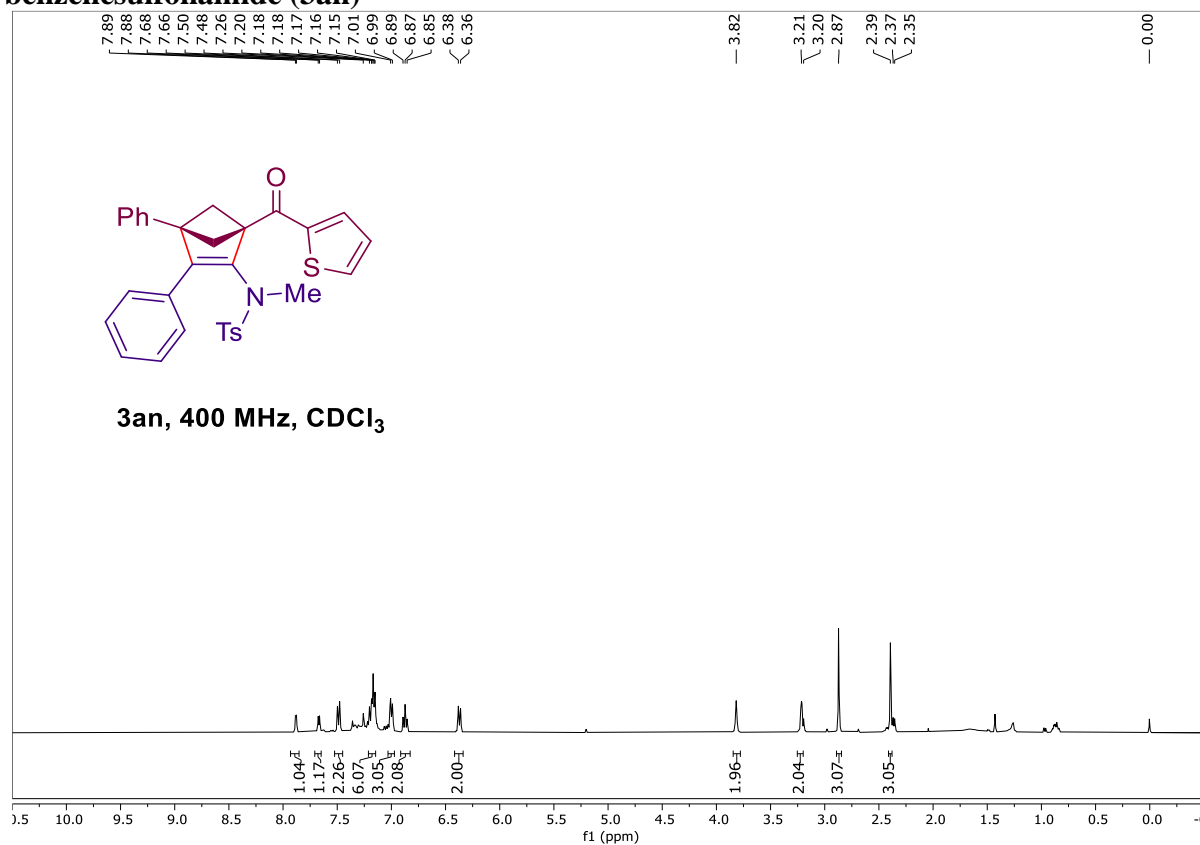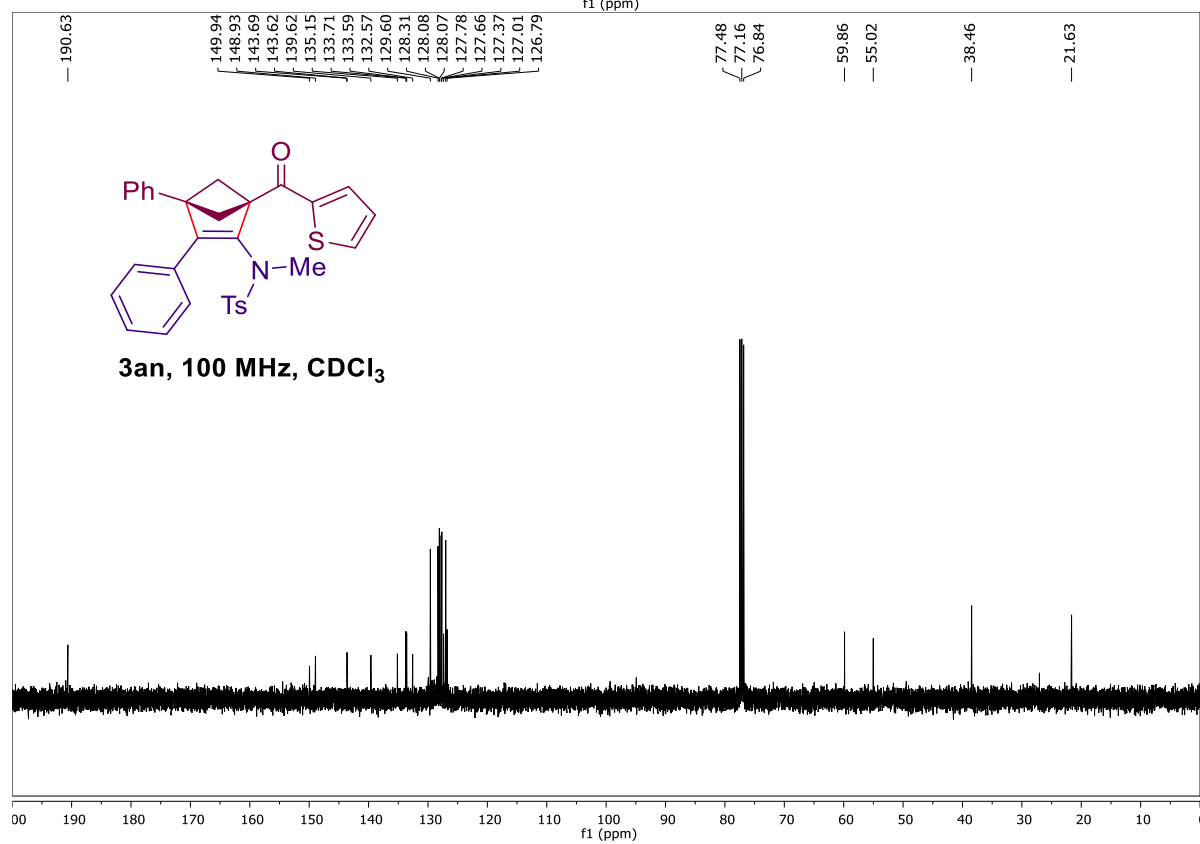



# 1-(2-Naphthoyl)-3-phenylbicyclo[2.1.1]hexan-2-one (8a)

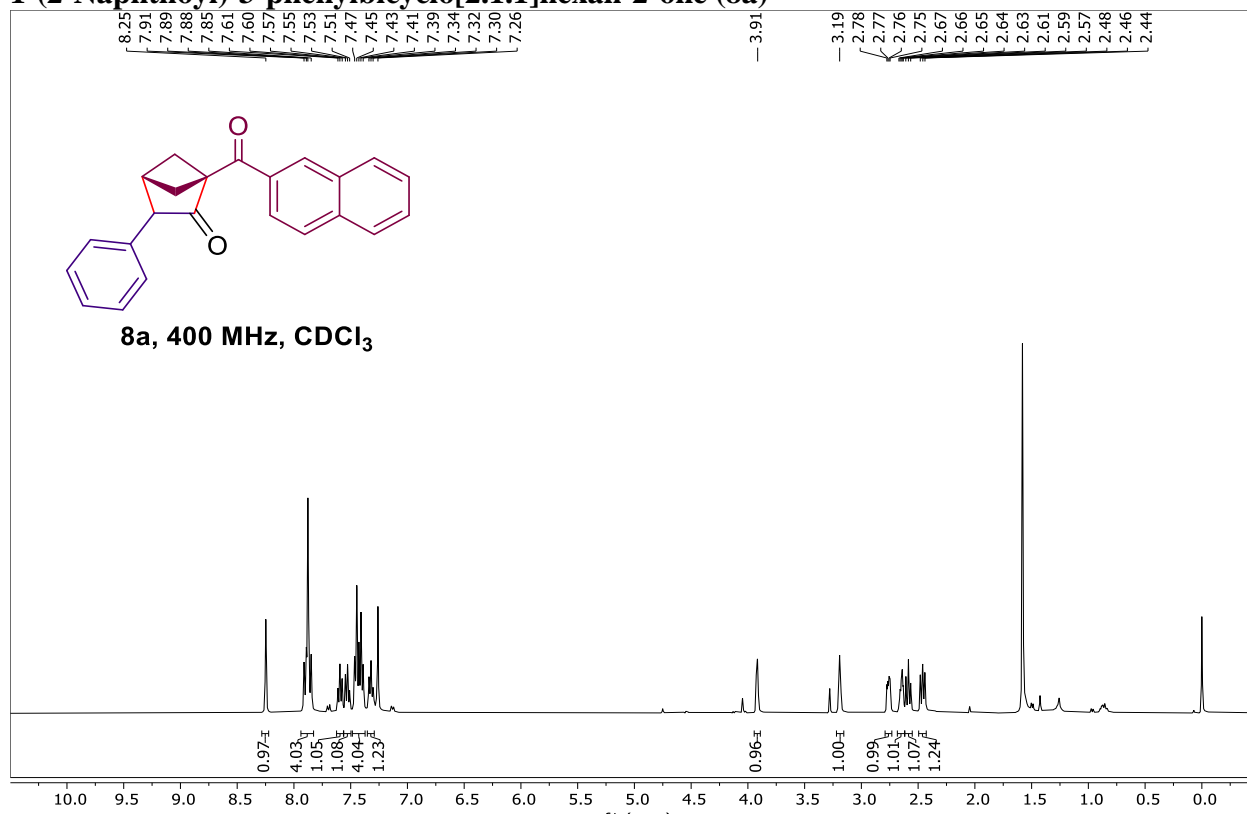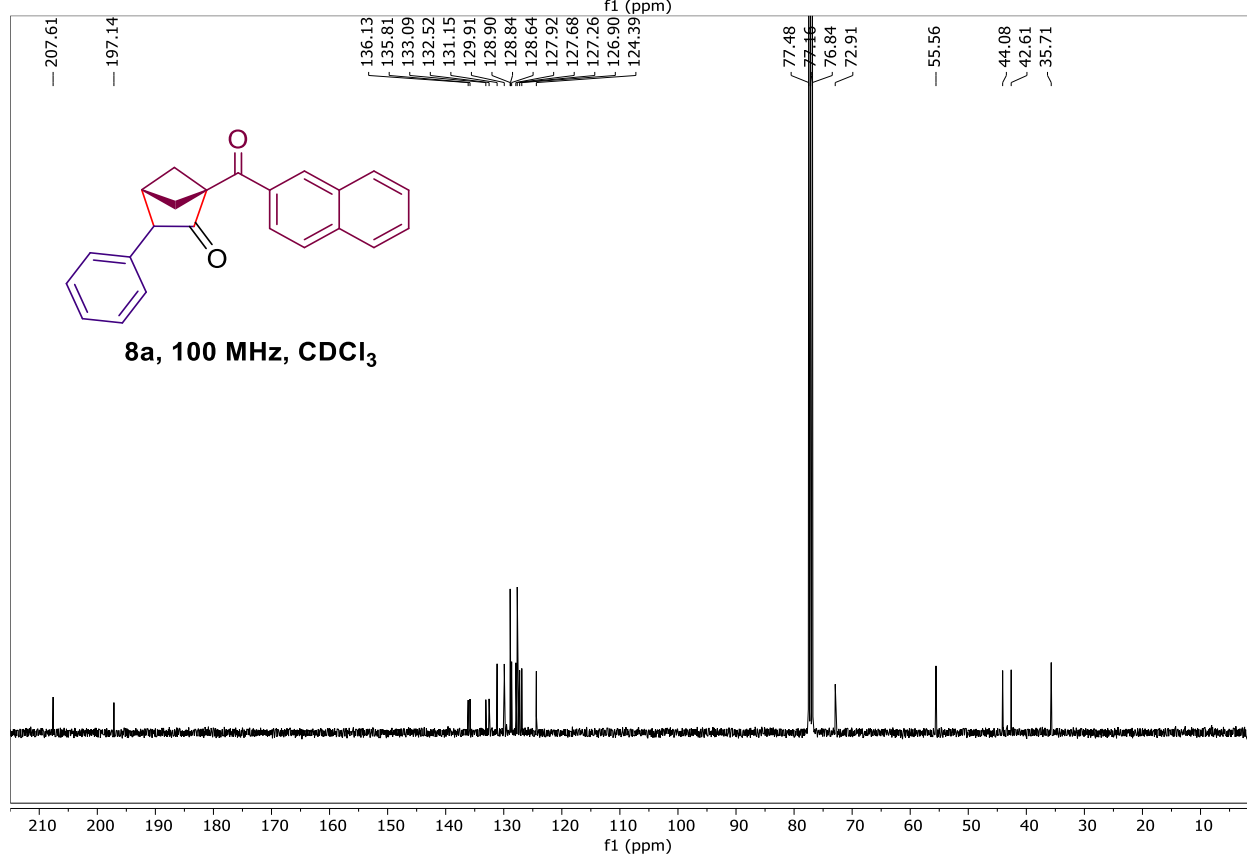

**(3-Bromo-2-(methylimino)-3-phenylbicyclo[2.1.1]hexan-1-yl)(naphthalen-2-yl) methanone (9a)**

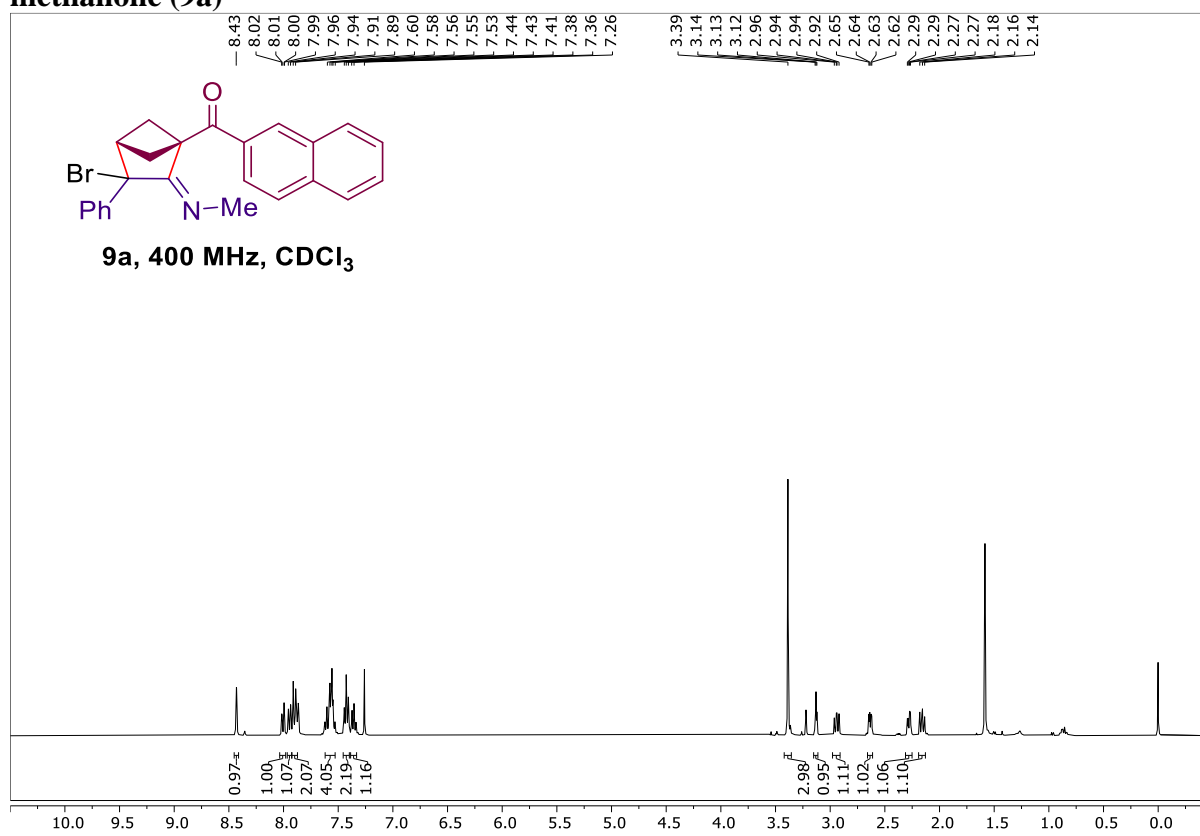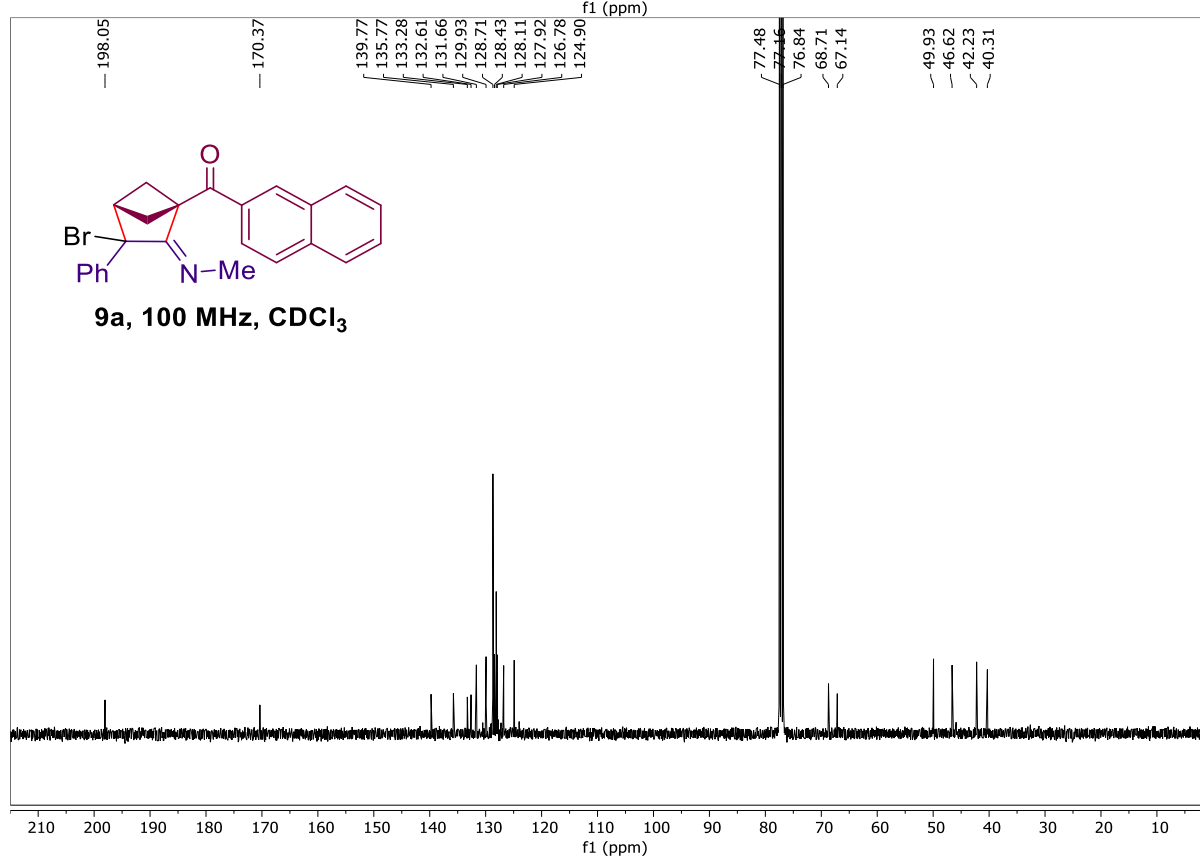

***N*,4-Dimethyl-*N*-(1-(naphthalen-2-yl(2-tosylhydrazineylidene)methyl)-3-phenylbicyclo[2.1.1]hex-2-en-2-yl)benzenesulfonamide (10a)**

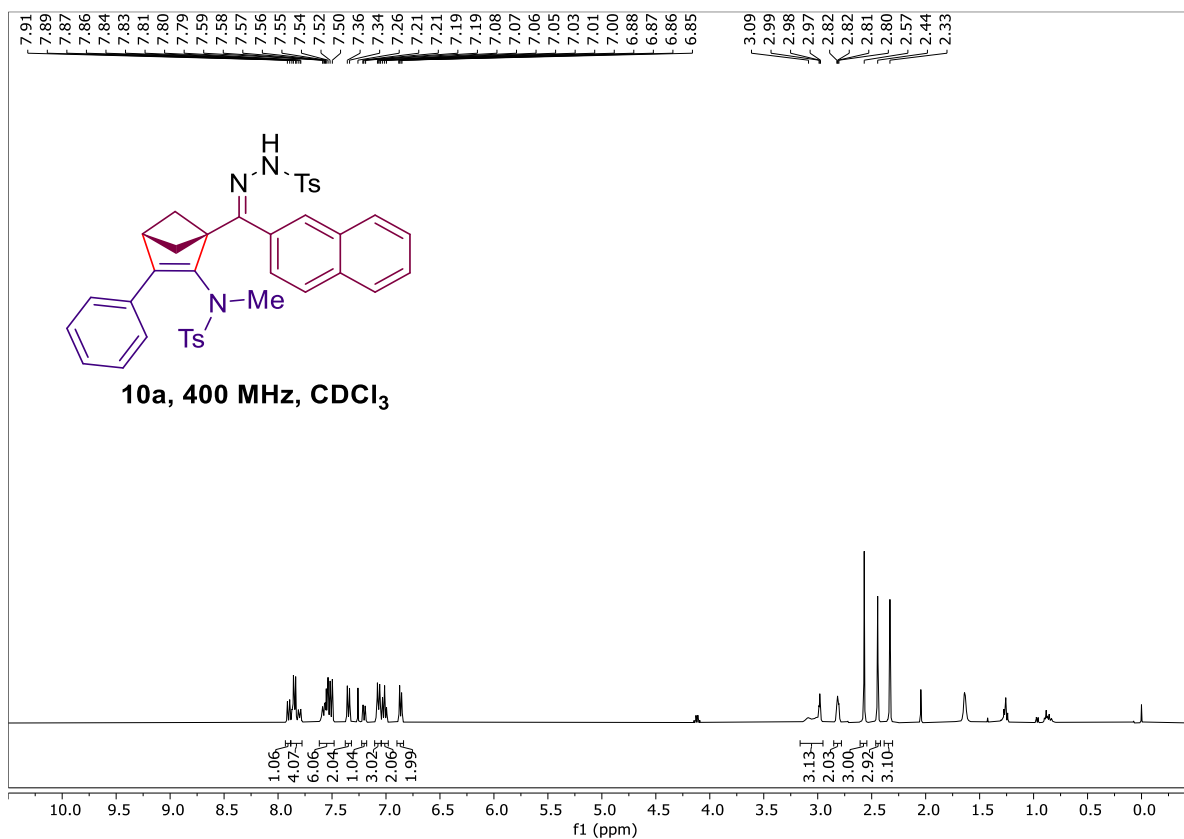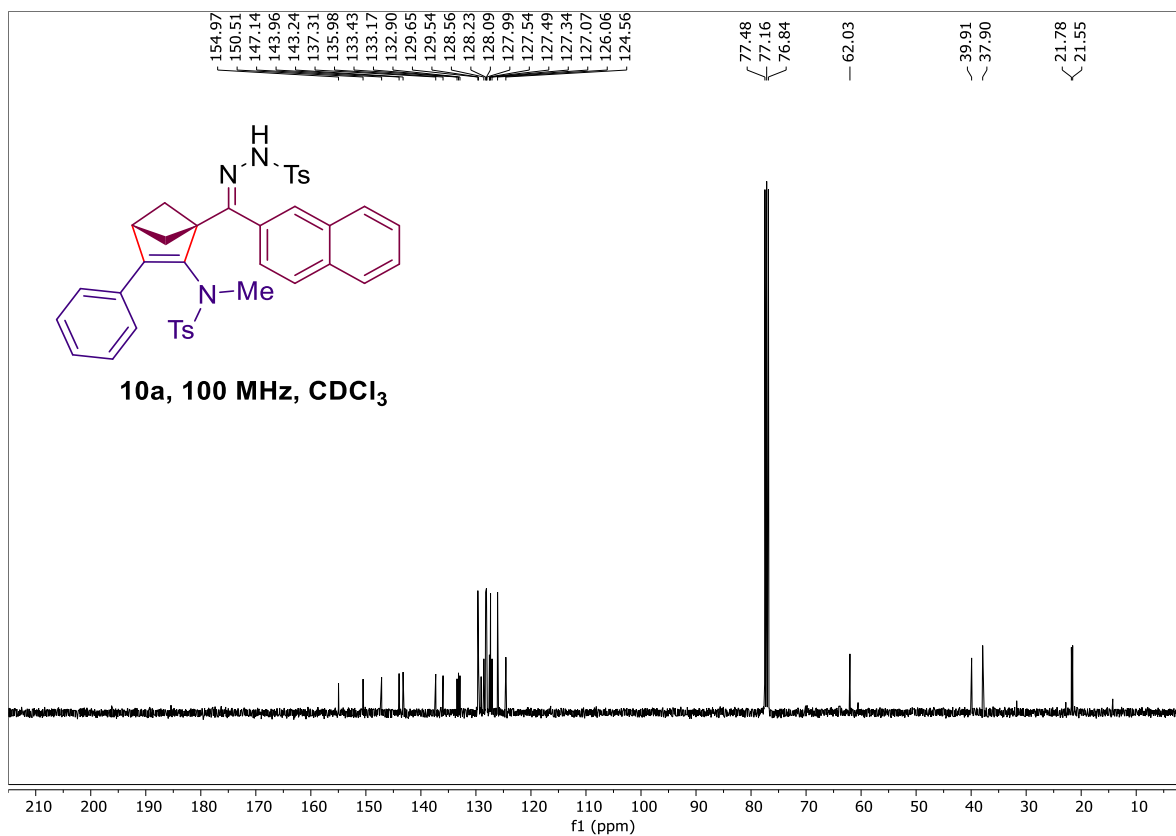

Supplement: d4sc03893b1.pdf [file d4sc03893b1.pdf]
